# Supplementary material for: Design and synthesis of novel pyrazolo[4,3-d]pyrimidines as potential therapeutic agents for acute lung injury
Source: PubMed Central journal article supplement (PMC6534230; doi:10.1080/14756366.2019.1618291), 2019-05-23

## Supporting Information

### Design and Synthesis of Novel Pyrazolo[4,3-*d*]pyrimidines as Potential Therapeutic Agents for Acute Lung Injury

#### Table of Contents

|                                                                                                       |    |
|-------------------------------------------------------------------------------------------------------|----|
| PART 1. General procedure for the synthesis of intermediates <b>C1~C4</b> .....                       | S1 |
| PART 2. <sup>1</sup> H NMR and <sup>13</sup> C NMR data of <b>1a~1j, 2a~2g, 3a~3g and 4a~4k</b> ..... | S2 |
| PART 3. HR-MS data of <b>1a~1j, 2a~2g, 3a~3g and 4a~4k</b> .....                                      | S3 |

## **PART 1. General procedure for the synthesis of intermediates C1~C4**

3,4,5-trimethoxybenzoic acid (1.06 g, 5 mmol), EDCI (1.438 g, 7.5 mmol), HOBT (1.013 g, 7.5 mmol), 4-amino-1-methyl-3-propyl-5-pyrazolecarboxamide (**SM**) (0.922 g, 5 mmol) and TEA (0.94 mL, 0.75 mmol) were dissolved in dry DCM (20 mL), and the mixture was stirred at room temperature for 18~20 h. DCM was removed under reduced pressure after the reaction was completed. Residue and sufficient water are mixed at room temperature, the intermediate **A1** was obtained as white solid by suction filtration. And intermediates **A2~A4** were obtained using the same procedure as intermediate **A1**.

To a solution of the sodium ethoxide (0.340 g, 5 mmol) was dissolved in ethanol (20 mL) and added intermediate **A1** (1.88 g, 5 mmol), and the reaction mixture were stirred at refluxed for 8~12 h. The resulting solution was concentrated under reduced pressure and the residue was acidified with hydrochloric acid (15%, v/v) to pH 7. The intermediate **B1** was obtained as white solid by suction filtration. And intermediate **B2~B4** were obtained using the same procedure as intermediate **B1**.

To a solution of intermediate **B1** (1.79 g, 5 mmol) were dissolved in phosphorus oxychloride (POCl<sub>3</sub>, 15 mL), and the reaction mixture were stirred at 95 °C, for 10~12 h under N<sub>2</sub> atmosphere. The excess POCl<sub>3</sub> was removed under reduced pressure after the reaction was completed. Slowly pour the oily residue into ice water and mix quickly and extracted with DCM (50 mL×3). The organic layer was washed with saturated NaHCO<sub>3</sub> solution and saturated brine solution, dried over Na<sub>2</sub>SO<sub>4</sub>, and concentrated under reduced pressure. The intermediate **C1** was obtained as yellow solid. And intermediates **C2~C4** were obtained using the same procedure as intermediate **C1**.

## PART 2. <sup>1</sup>H NMR and <sup>13</sup>C NMR data of 1a~1j, 2a~2g, 3a~3g and 4a~4k.

### <sup>1</sup>H NMR and <sup>13</sup>C NMR for 1a

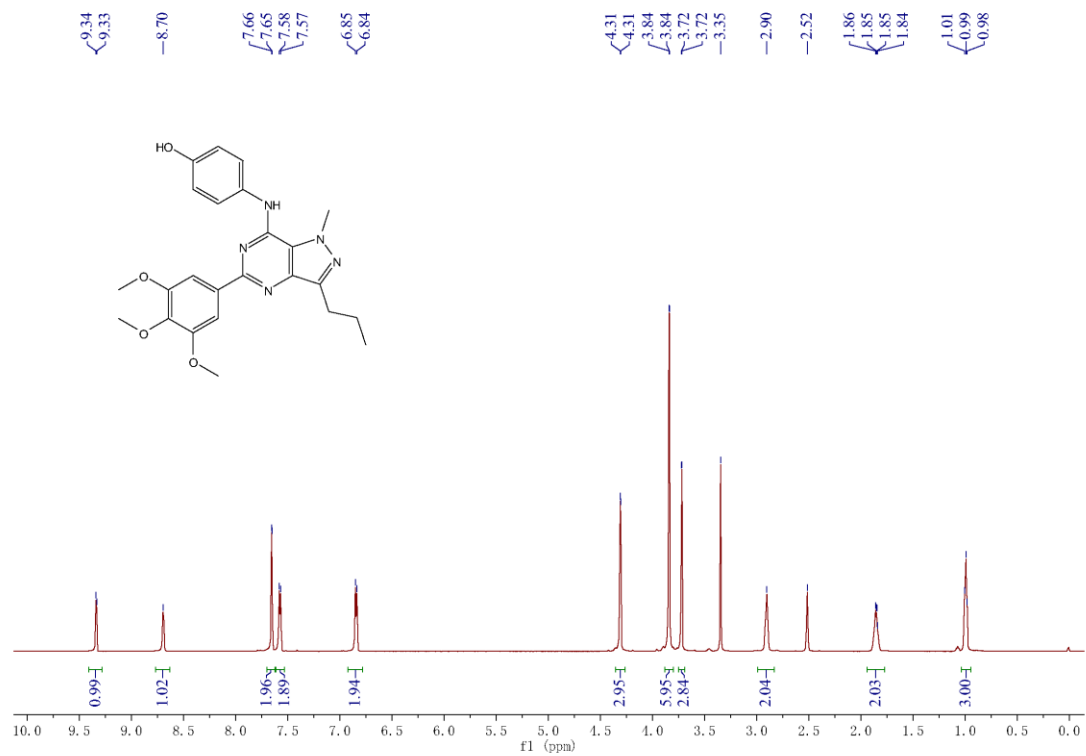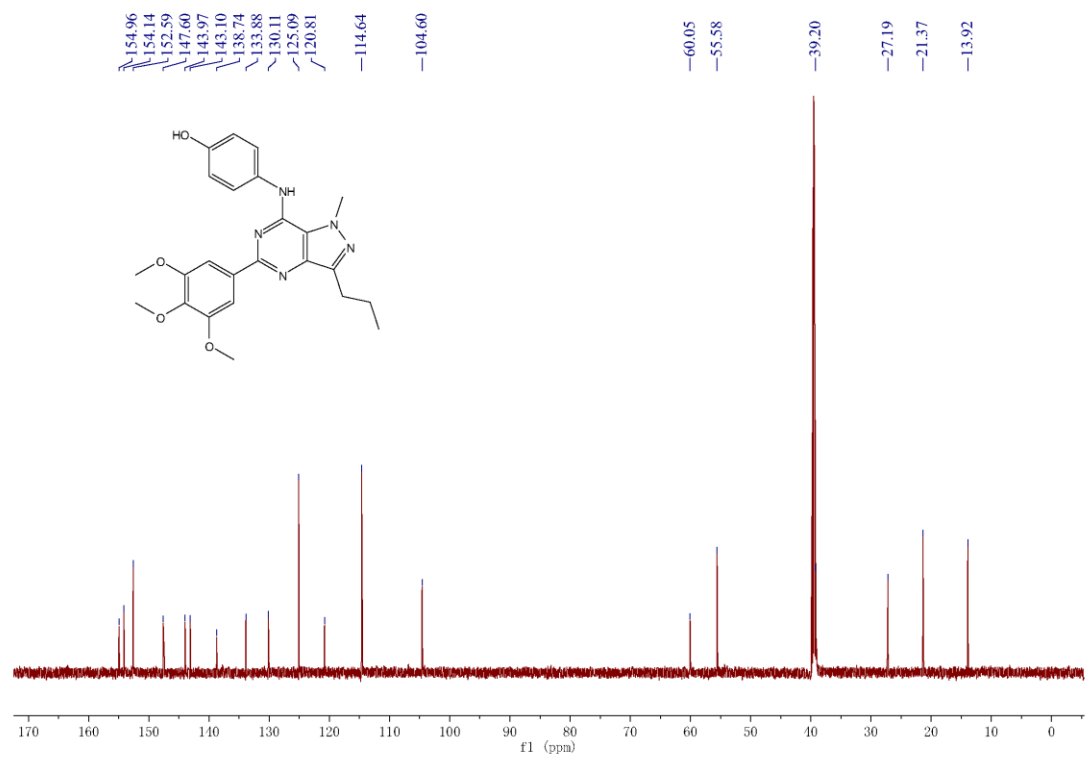

### $^1\text{H}$ NMR for *1b*

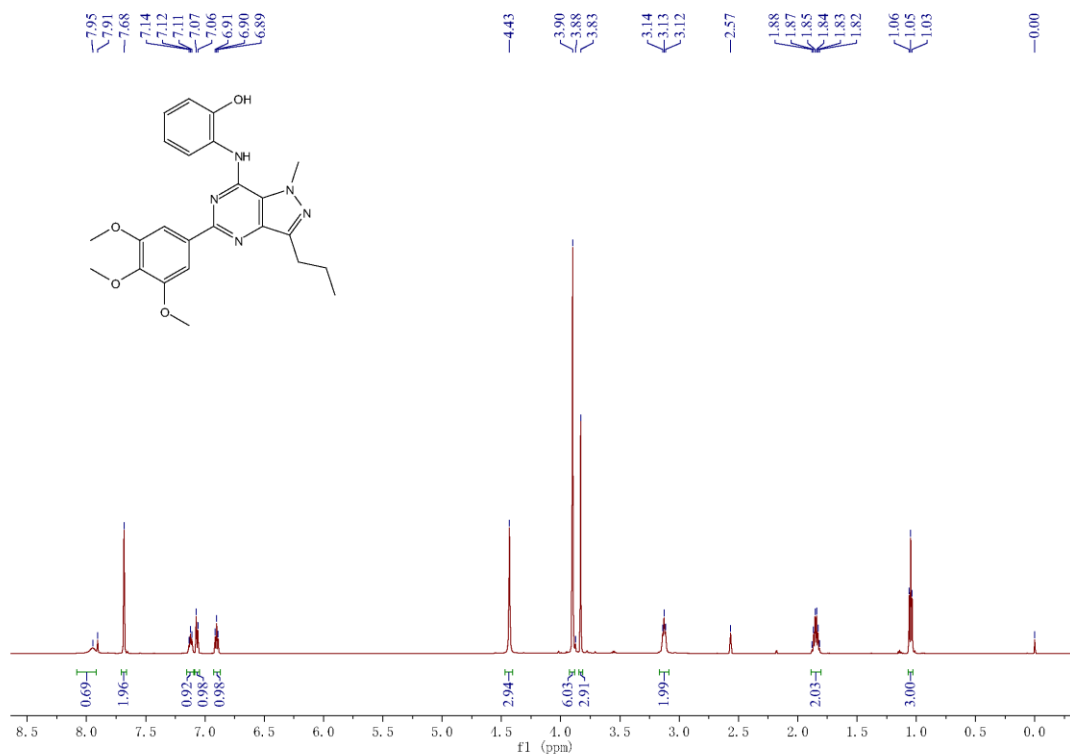

### $^1\text{H}$ NMR and $^{13}\text{C}$ NMR for *1c*

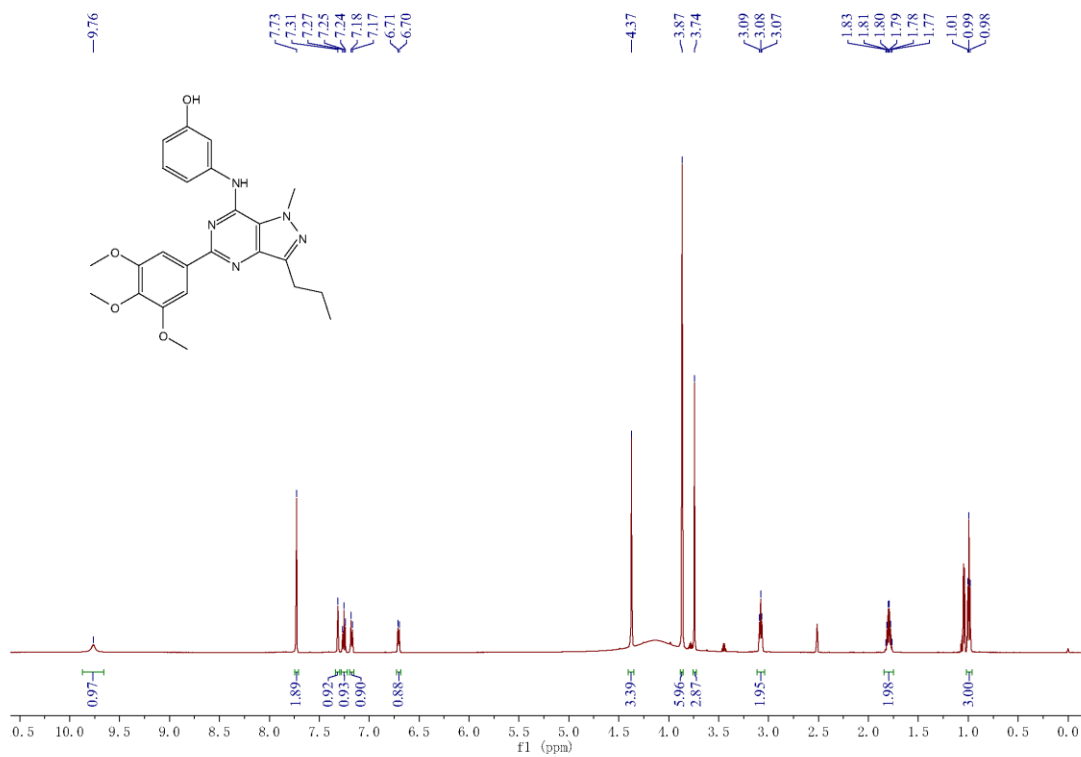

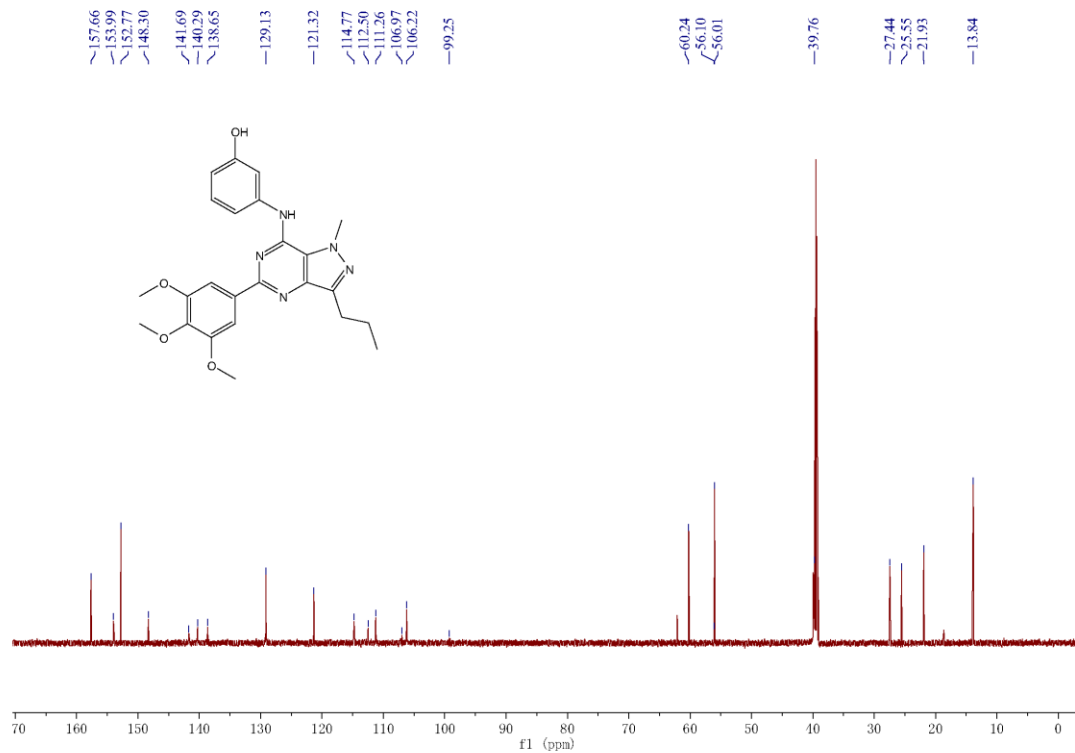

**<sup>1</sup>H NMR and <sup>13</sup>C NMR for 1d**

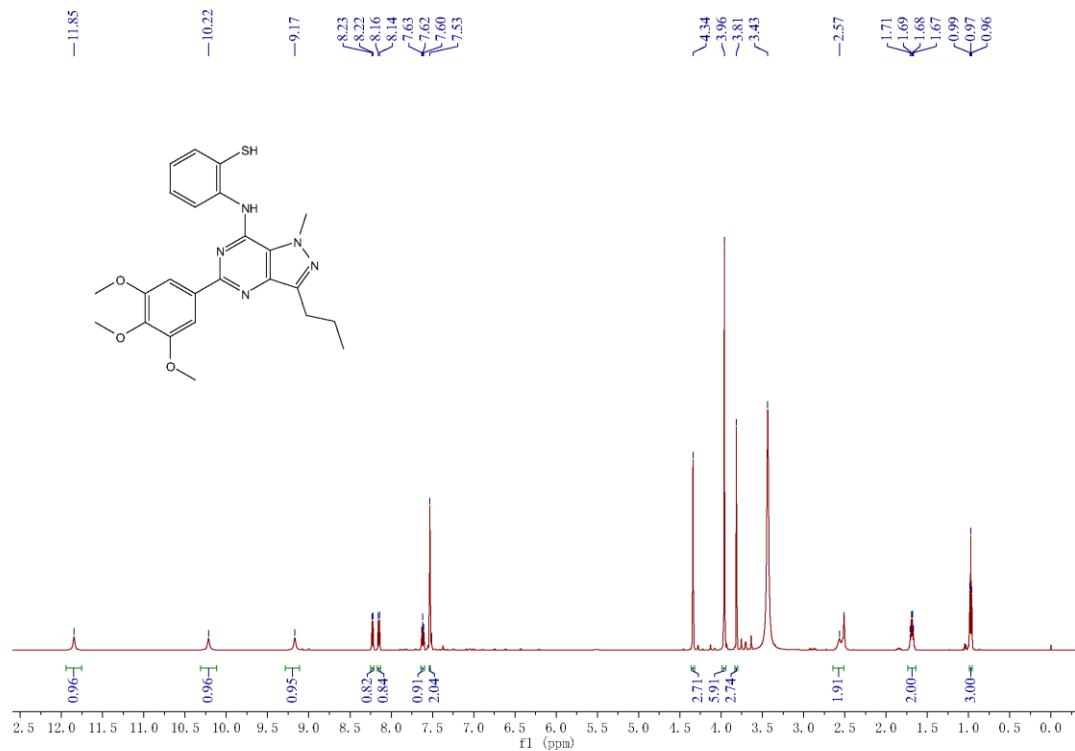

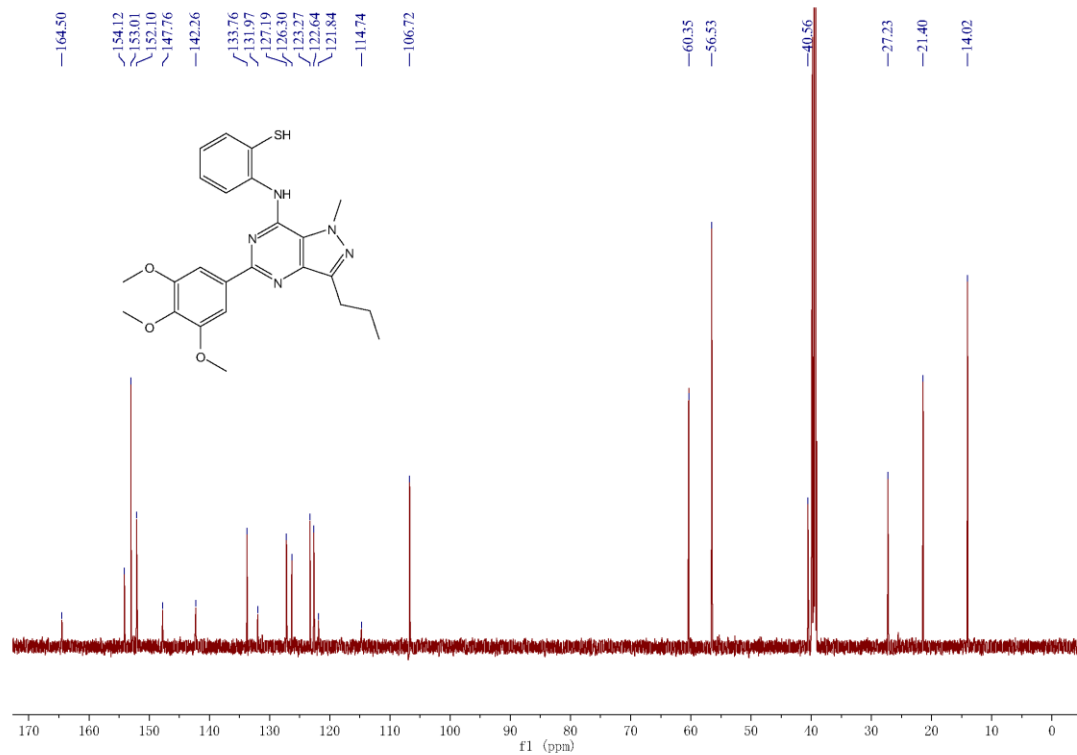

### <sup>1</sup>H NMR for 1e

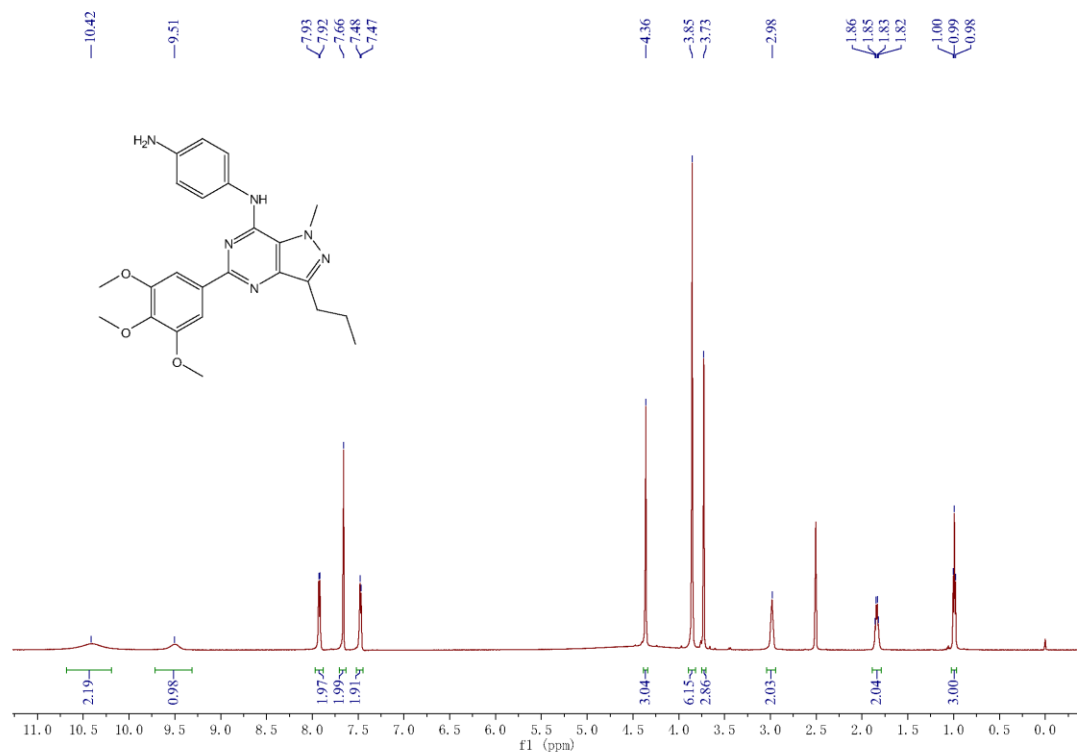

# $^1\text{H}$ NMR and $^{13}\text{C}$ NMR for *1f*

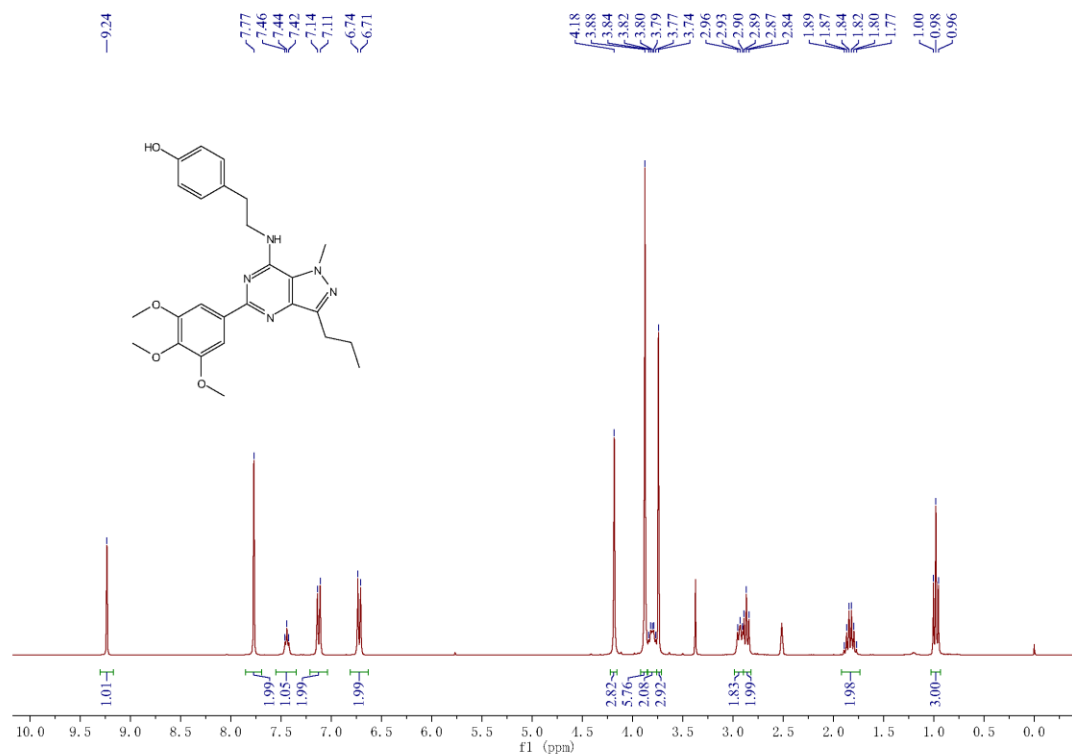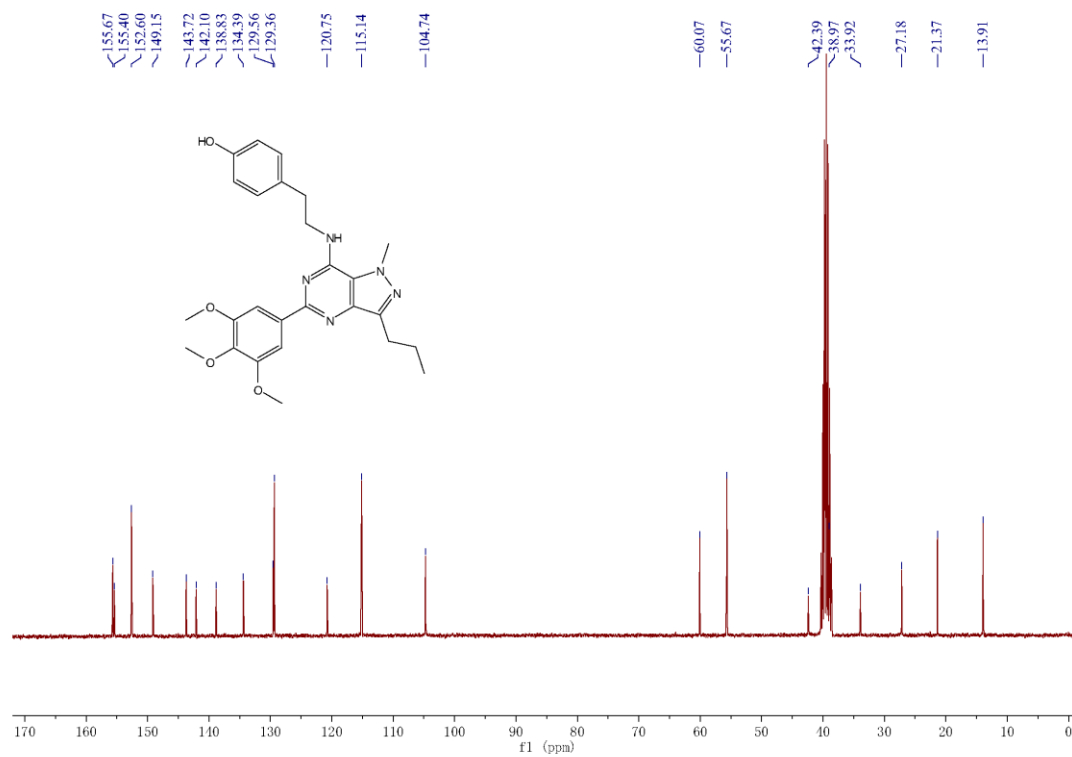

### $^1\text{H}$ NMR for *1g*

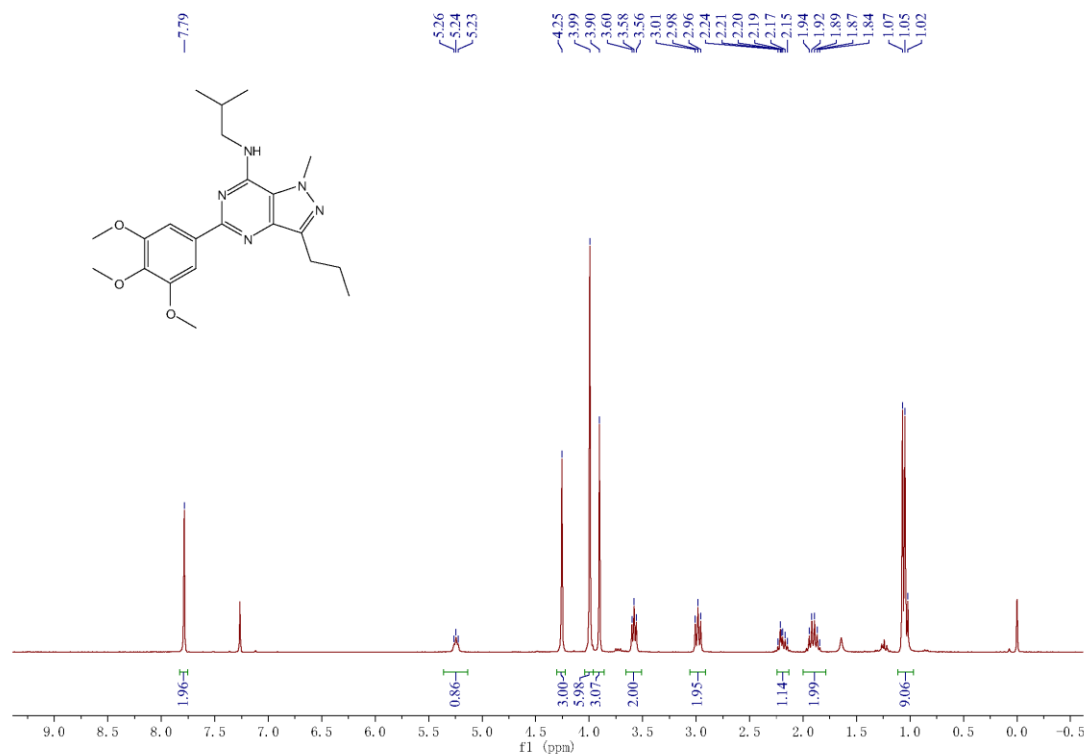

### $^1\text{H}$ NMR and $^{13}\text{C}$ NMR for *1h*

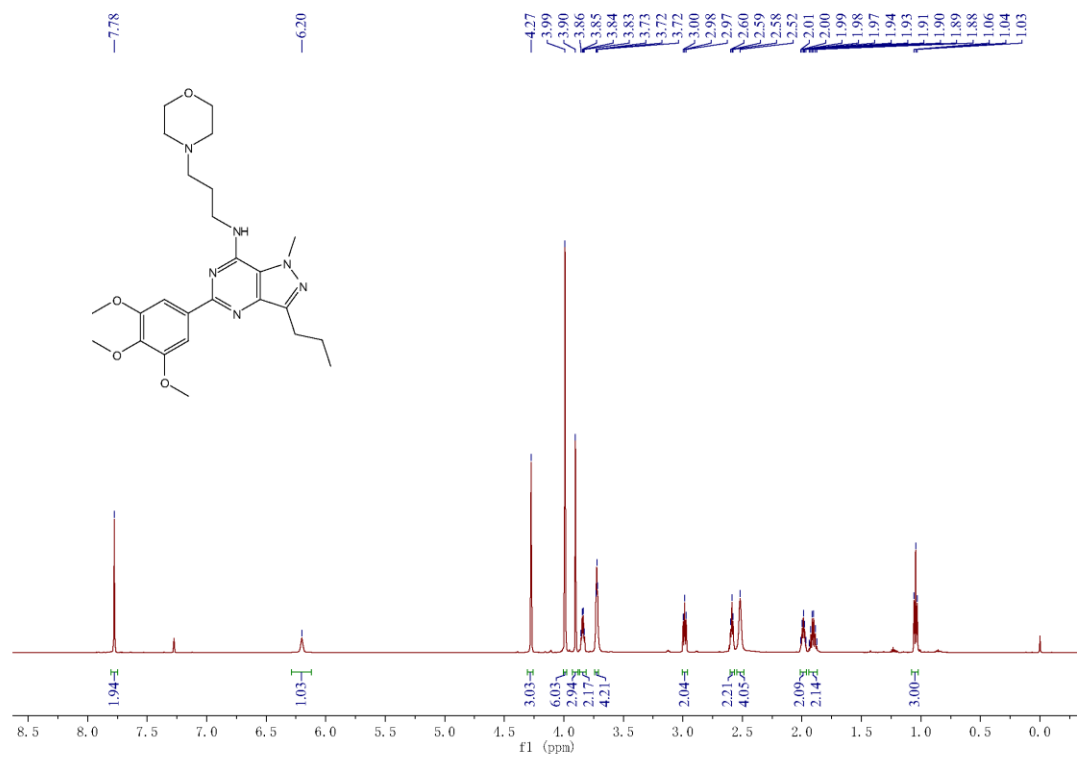



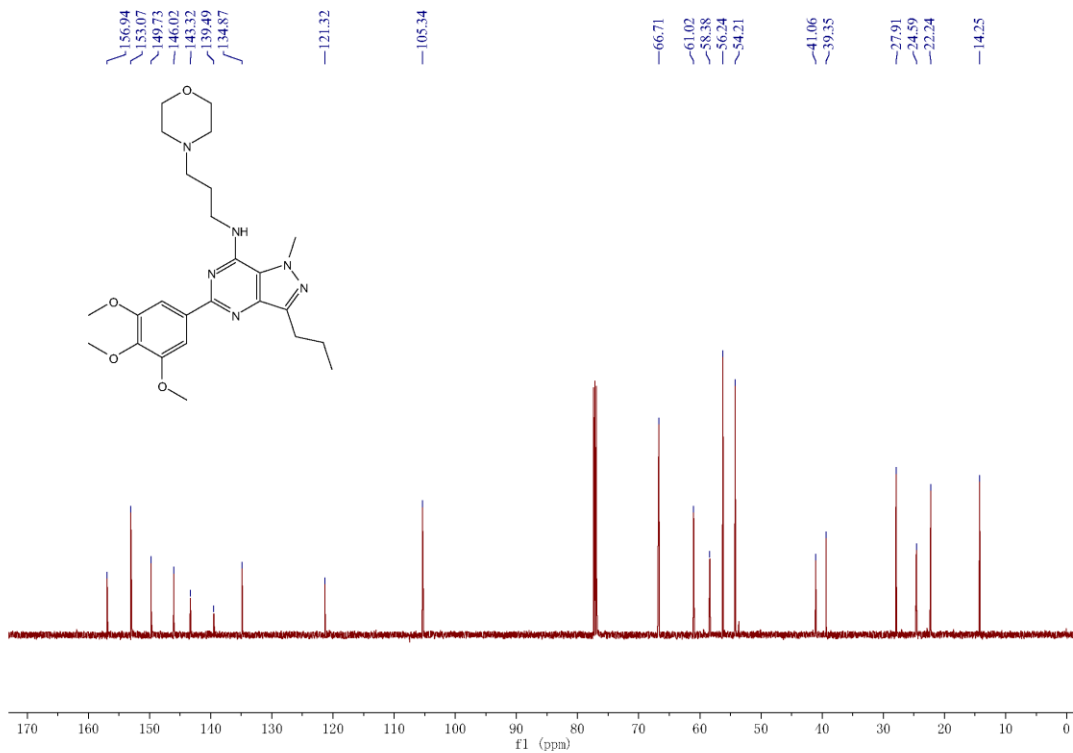

### <sup>1</sup>H NMR and <sup>13</sup>C NMR for **1i**

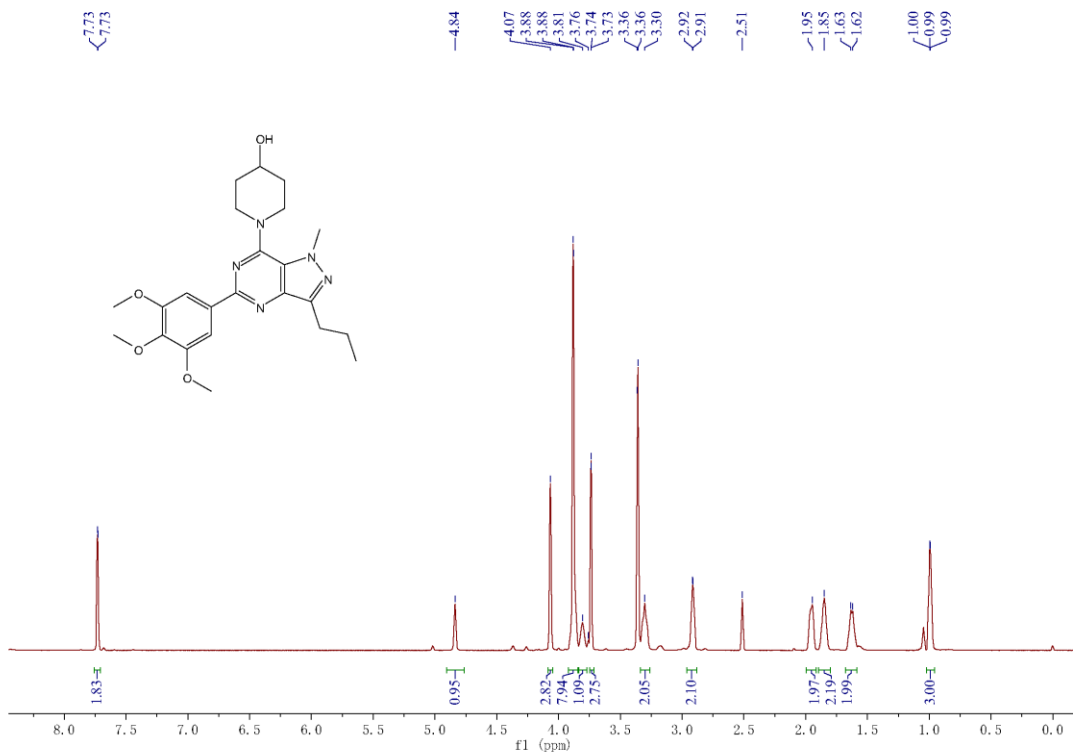

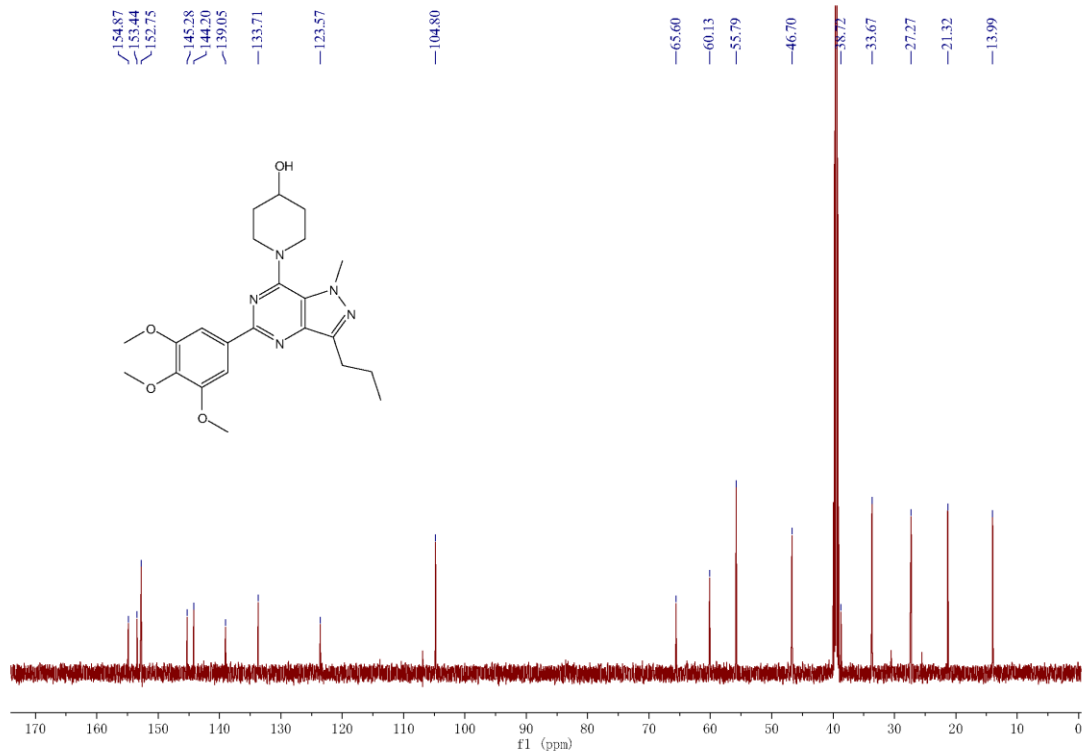

### <sup>1</sup>H NMR and <sup>13</sup>C NMR for **1j**

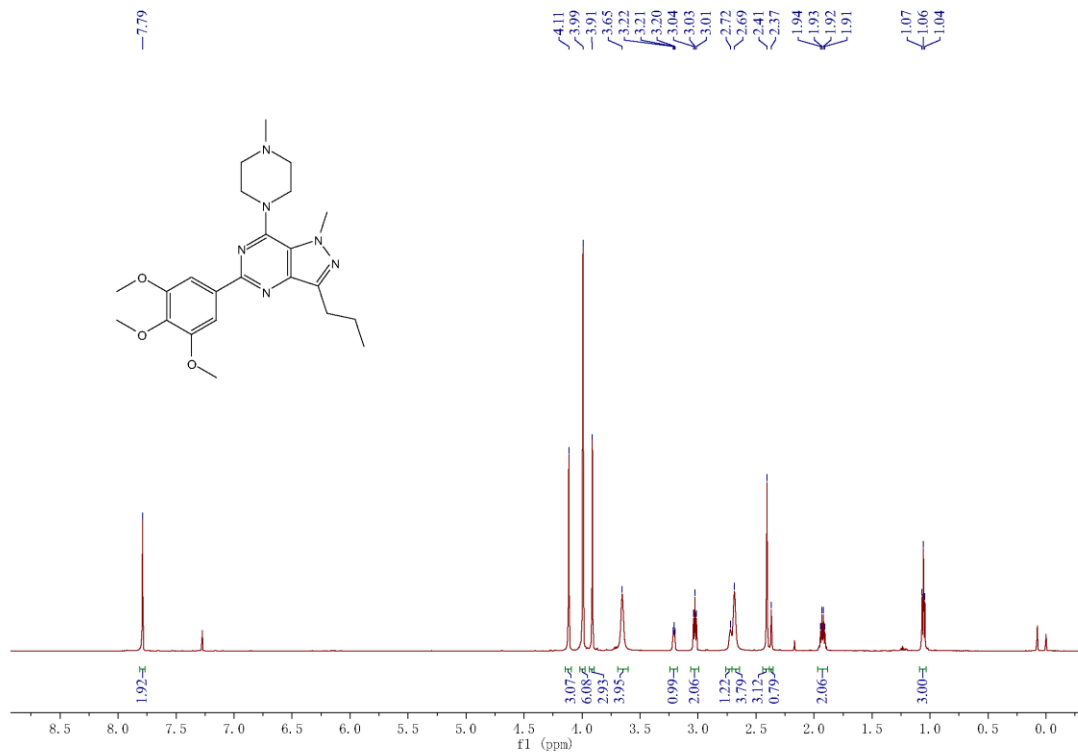

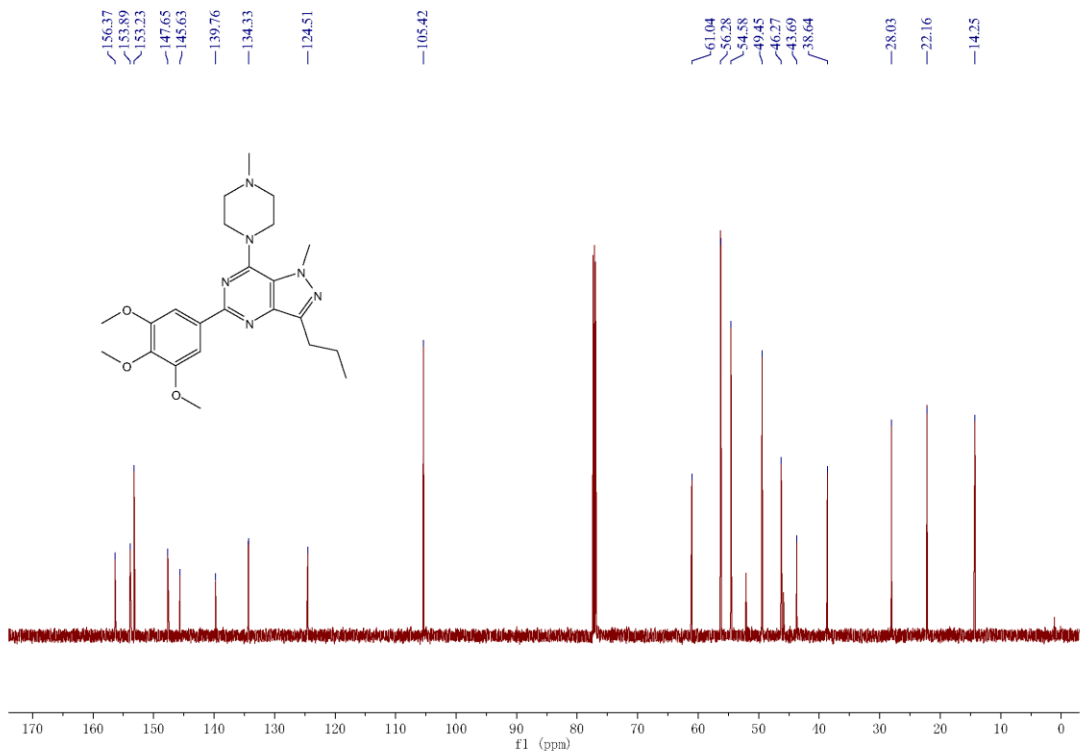

### <sup>1</sup>H NMR and <sup>13</sup>C NMR for **2a**

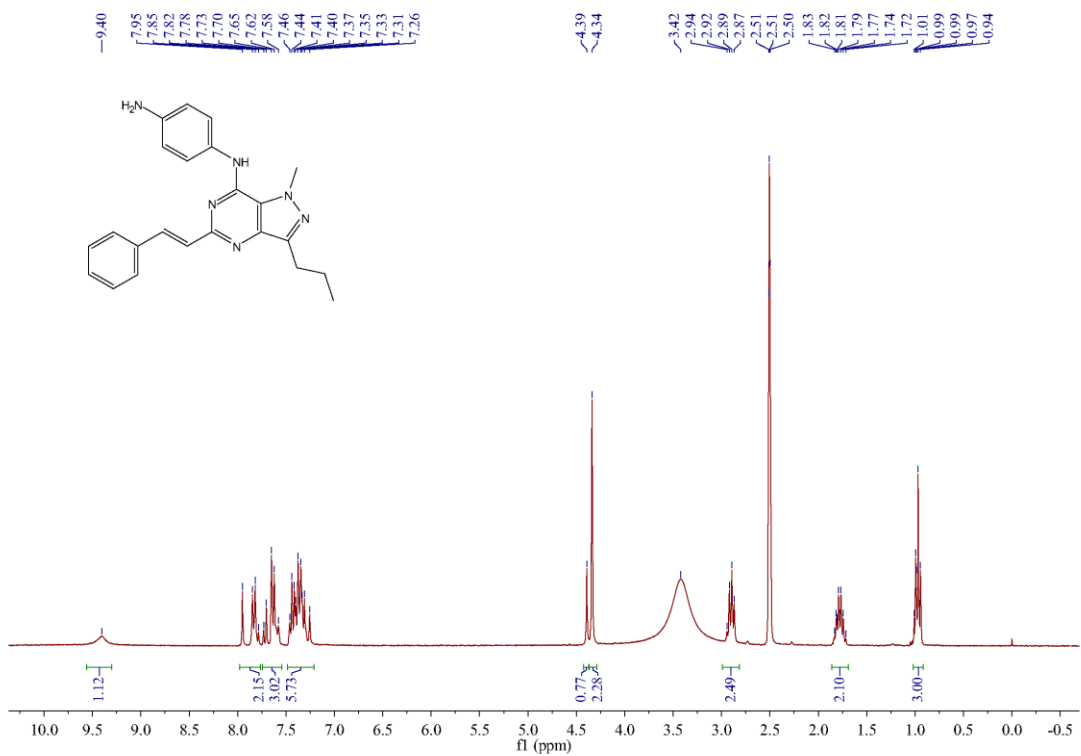

# $^1\text{H}$ NMR and $^{13}\text{C}$ NMR for **2b**

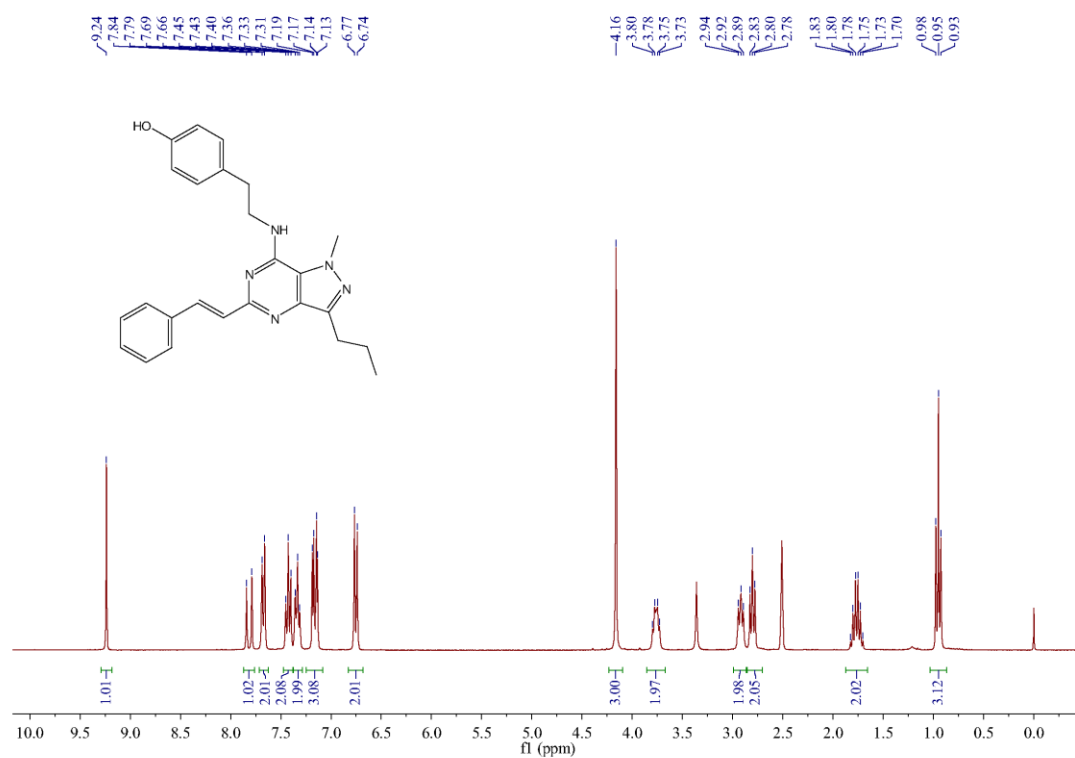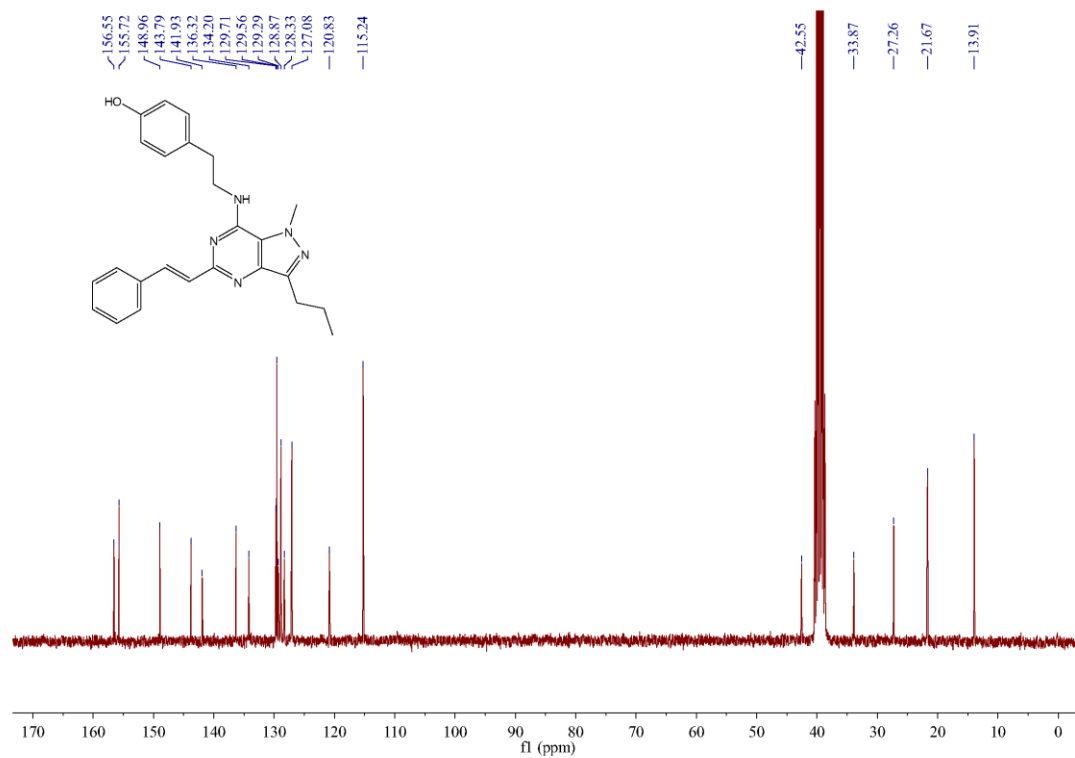

# $^1\text{H}$ NMR and $^{13}\text{C}$ NMR for 2c

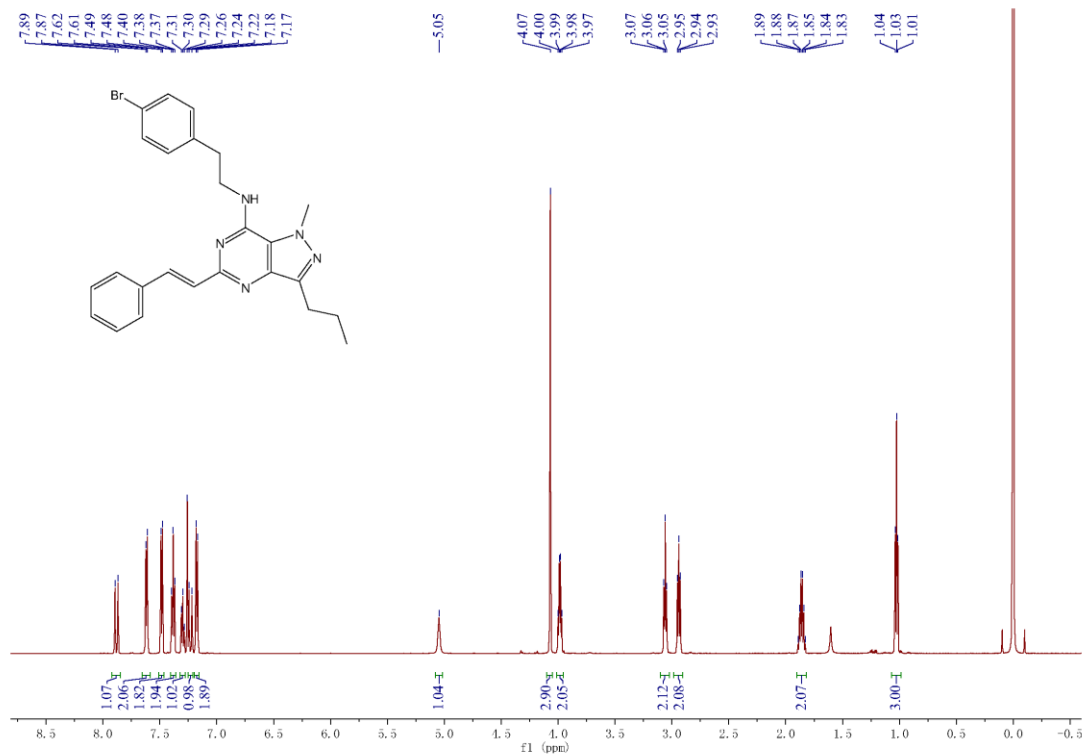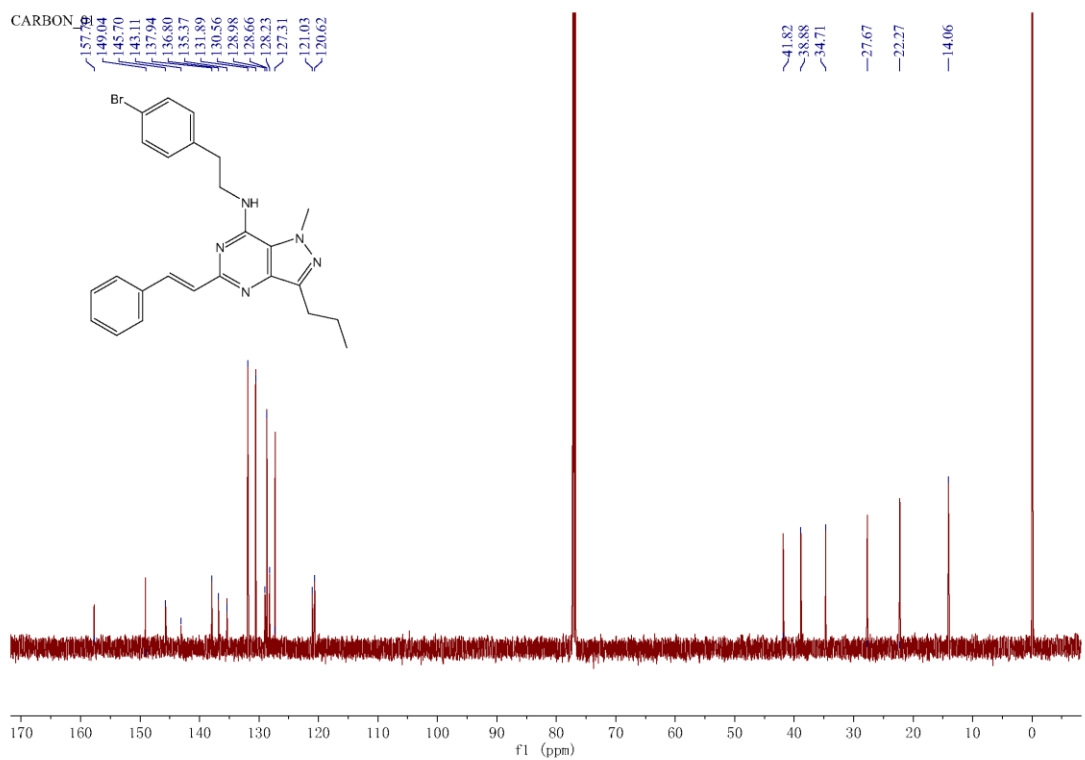

# $^1\text{H}$ NMR and $^{13}\text{C}$ NMR for *2d*

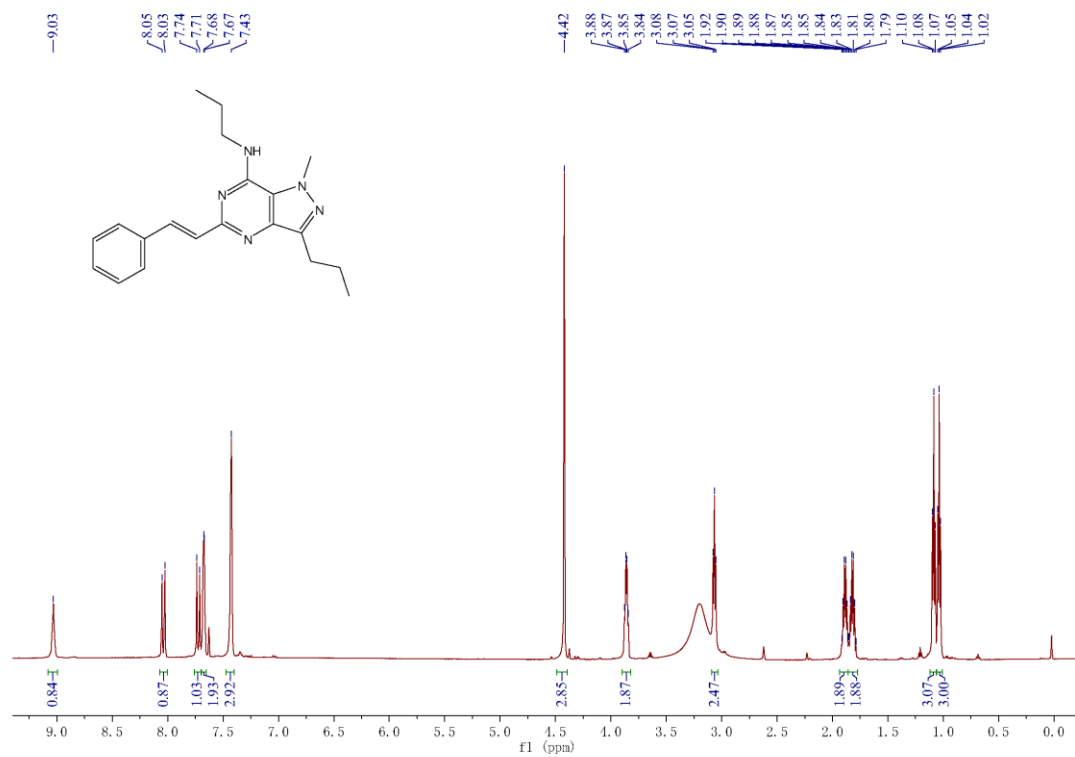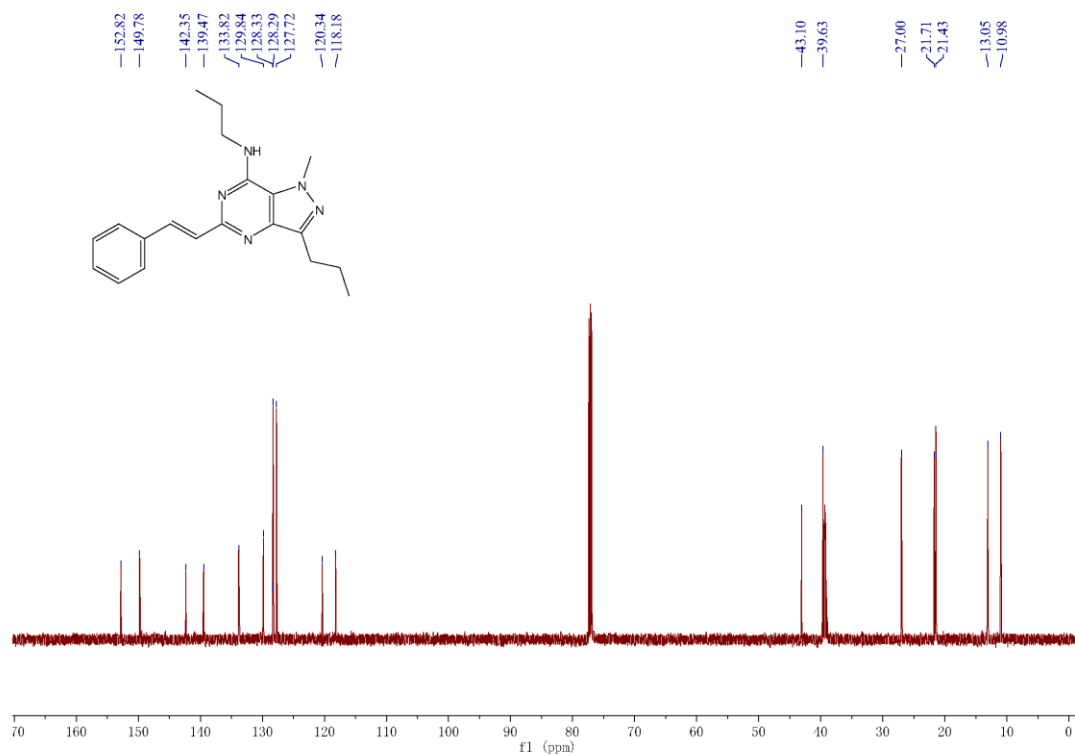

### <sup>1</sup>H NMR for 2e

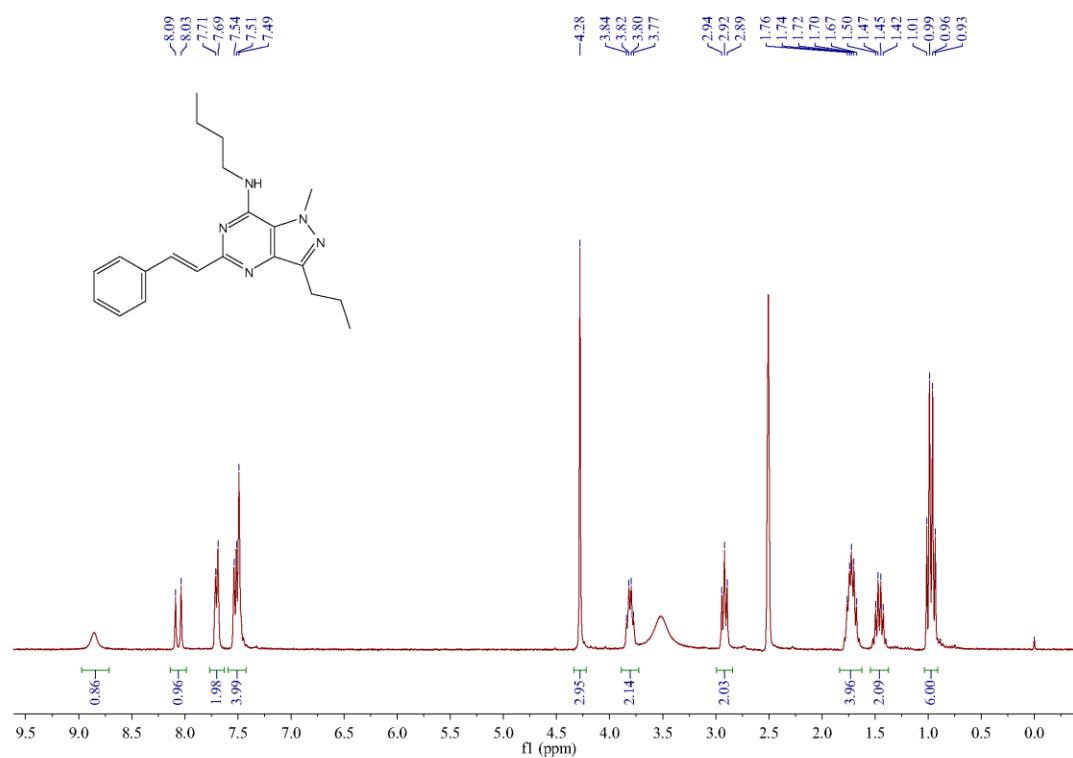

### <sup>1</sup>H NMR for 2f

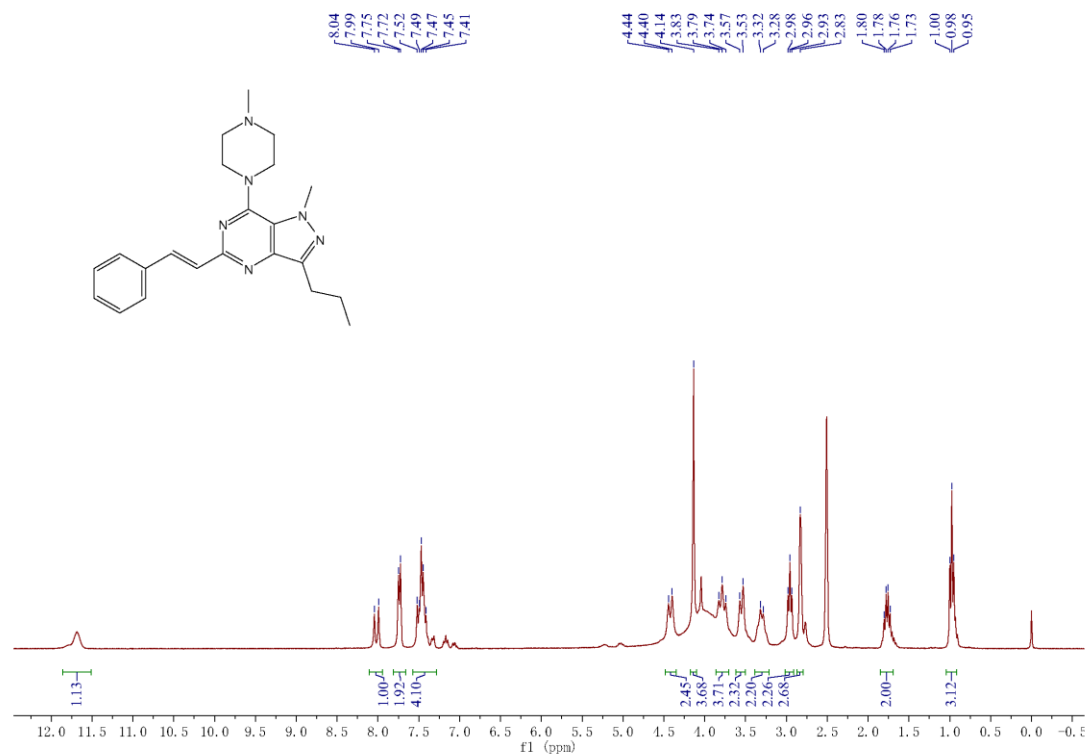

# $^1\text{H}$ NMR and $^{13}\text{C}$ NMR for 2g

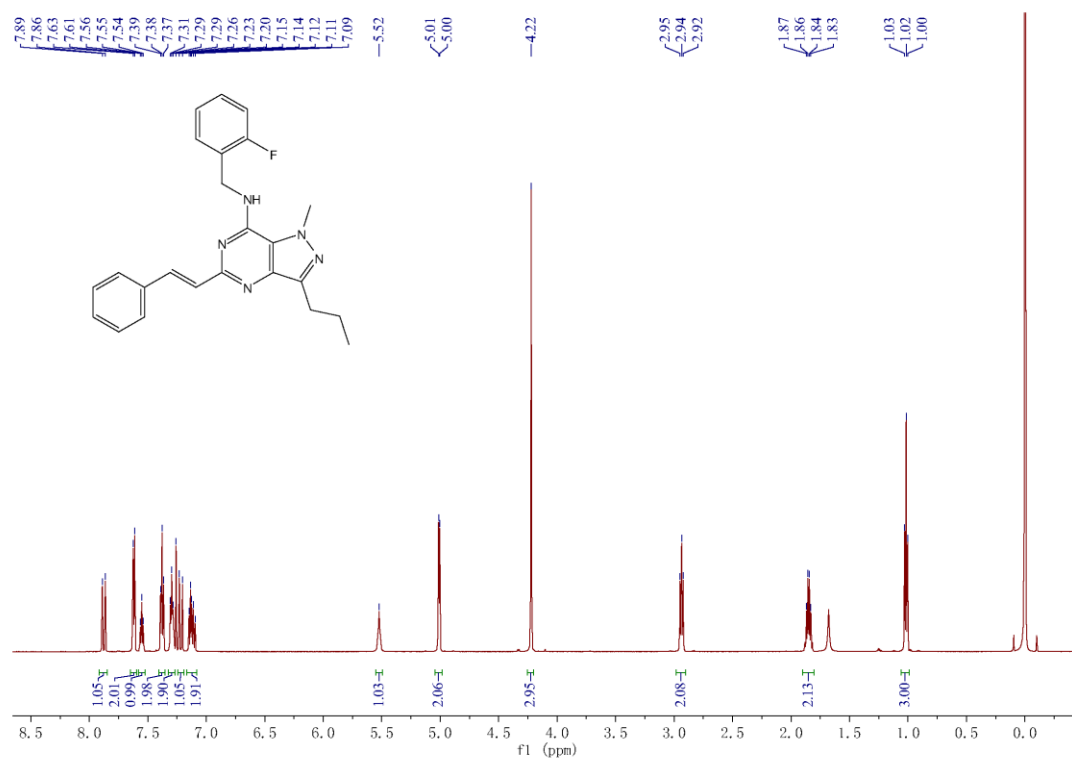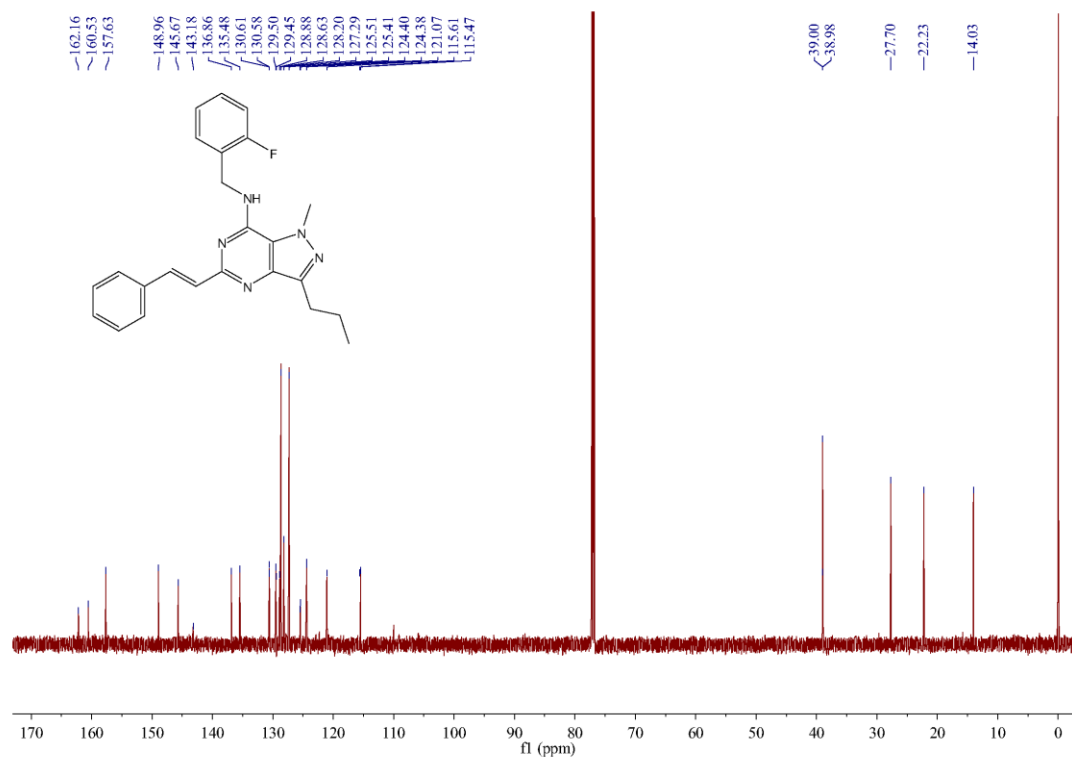



# $^1\text{H}$ NMR and $^{13}\text{C}$ NMR for *3a*

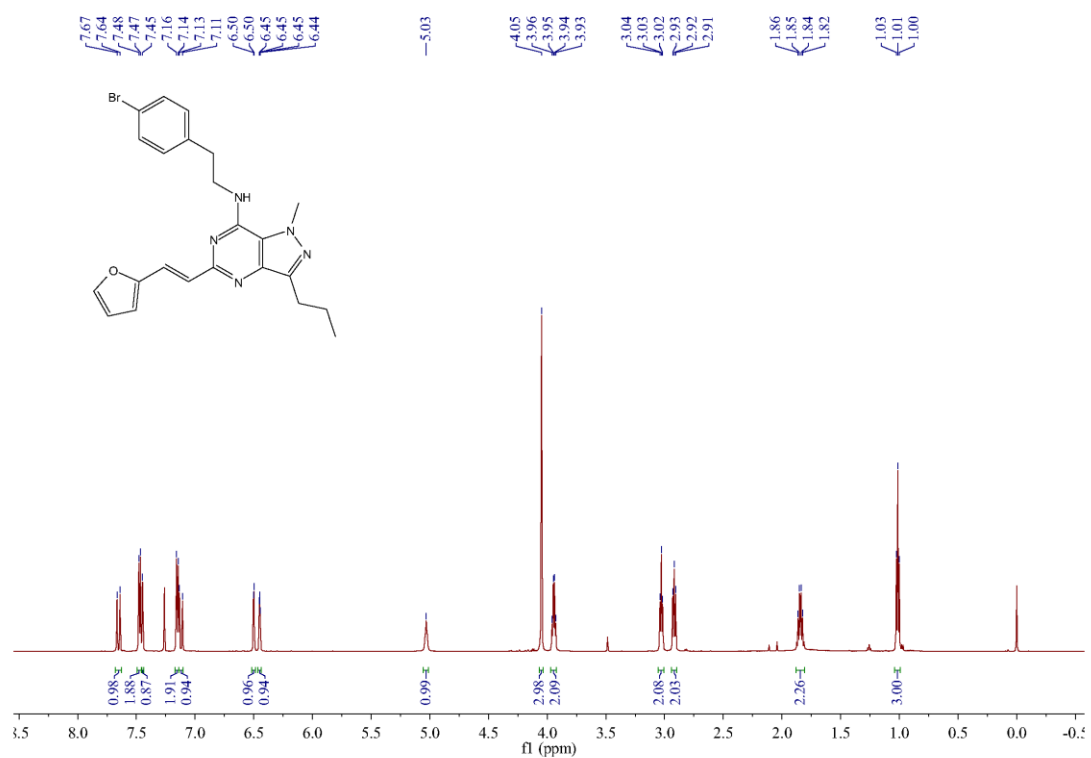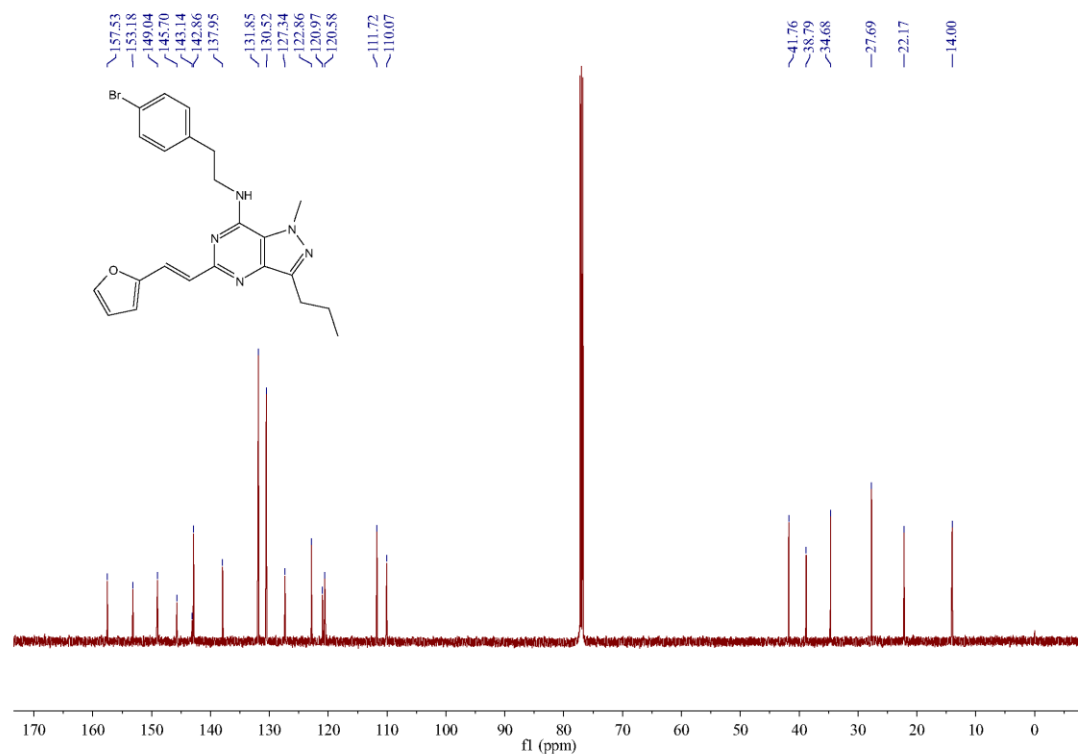

# $^1\text{H}$ NMR and $^{13}\text{C}$ NMR for **3b**

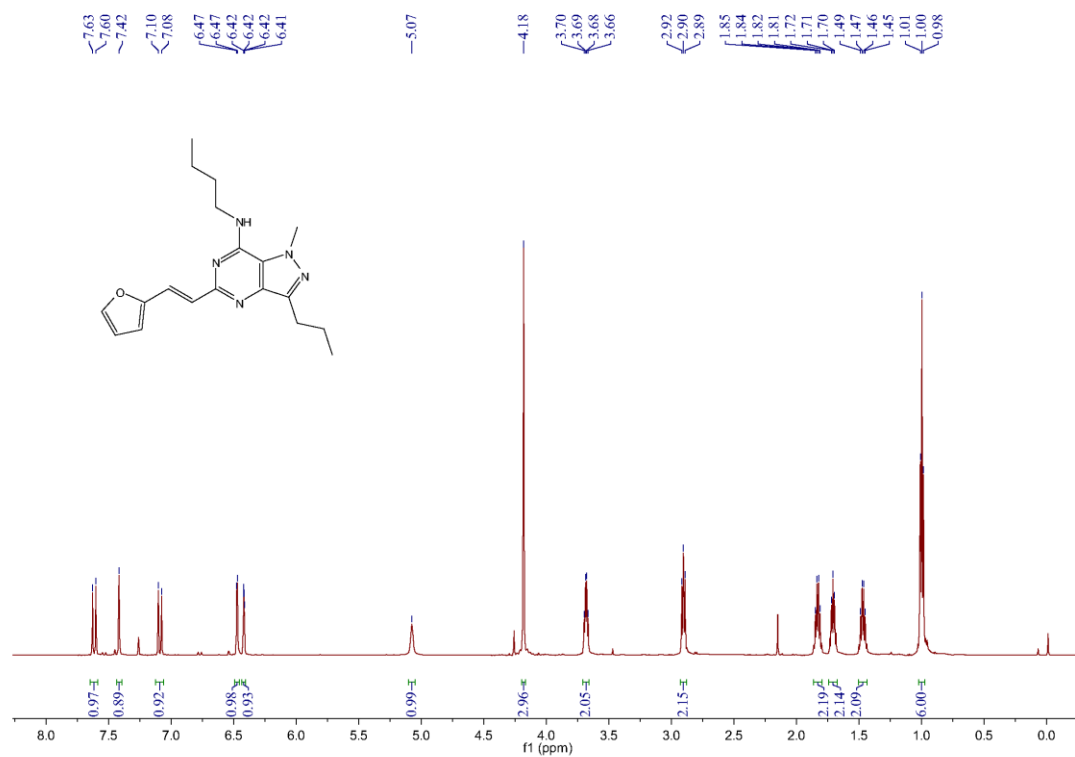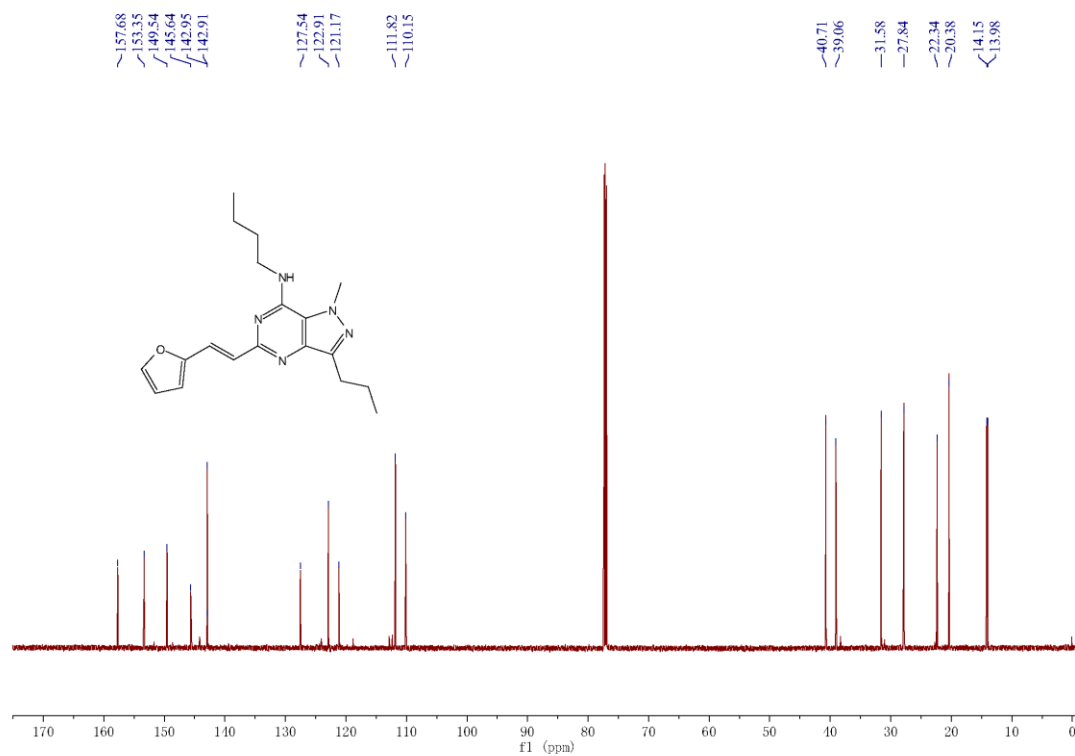

# $^1\text{H}$ NMR and $^{13}\text{C}$ NMR for 3c

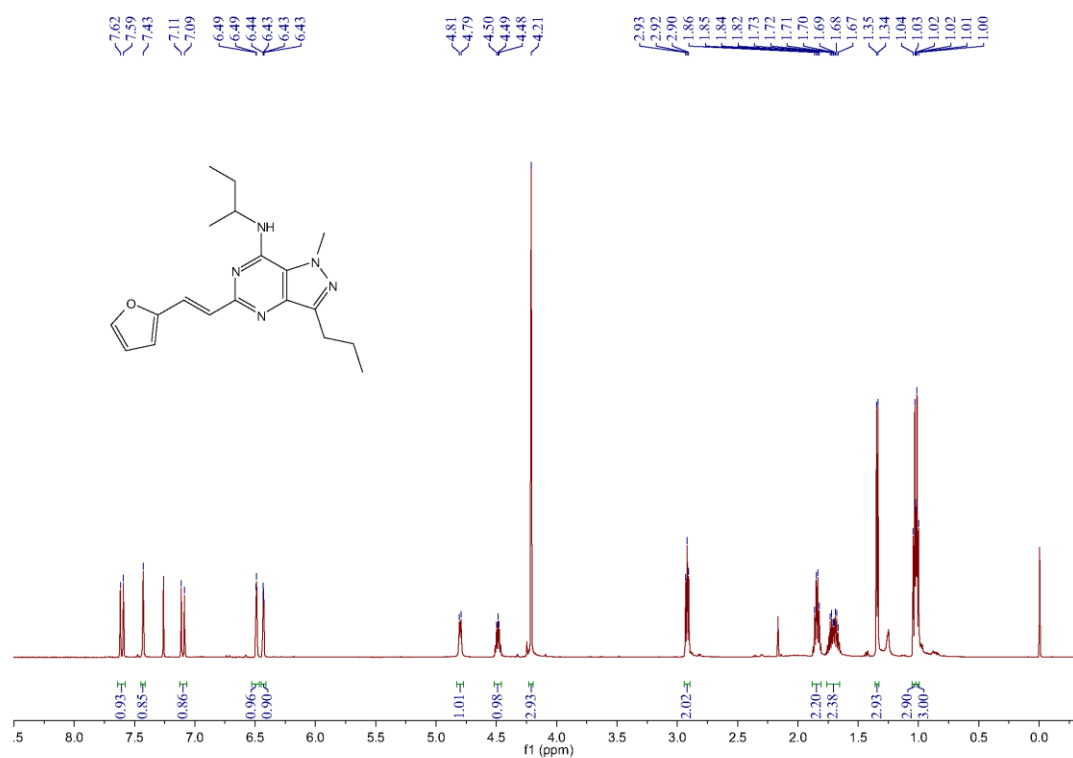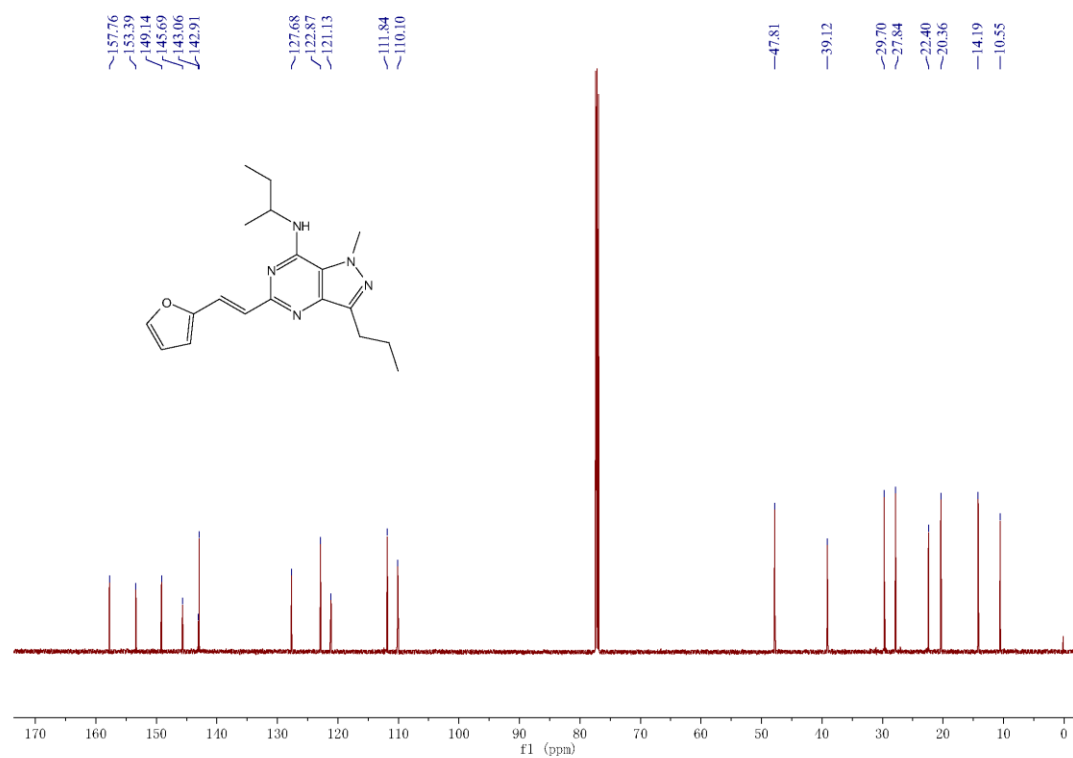

# $^1\text{H}$ NMR and $^{13}\text{C}$ NMR for *3d*

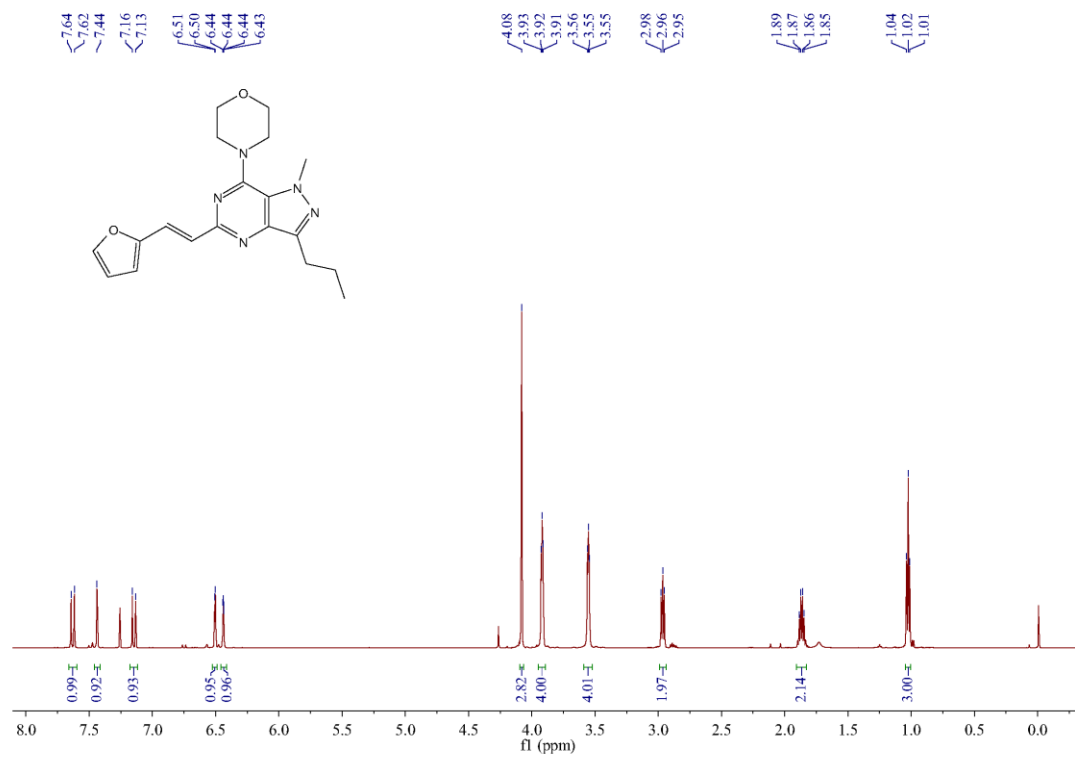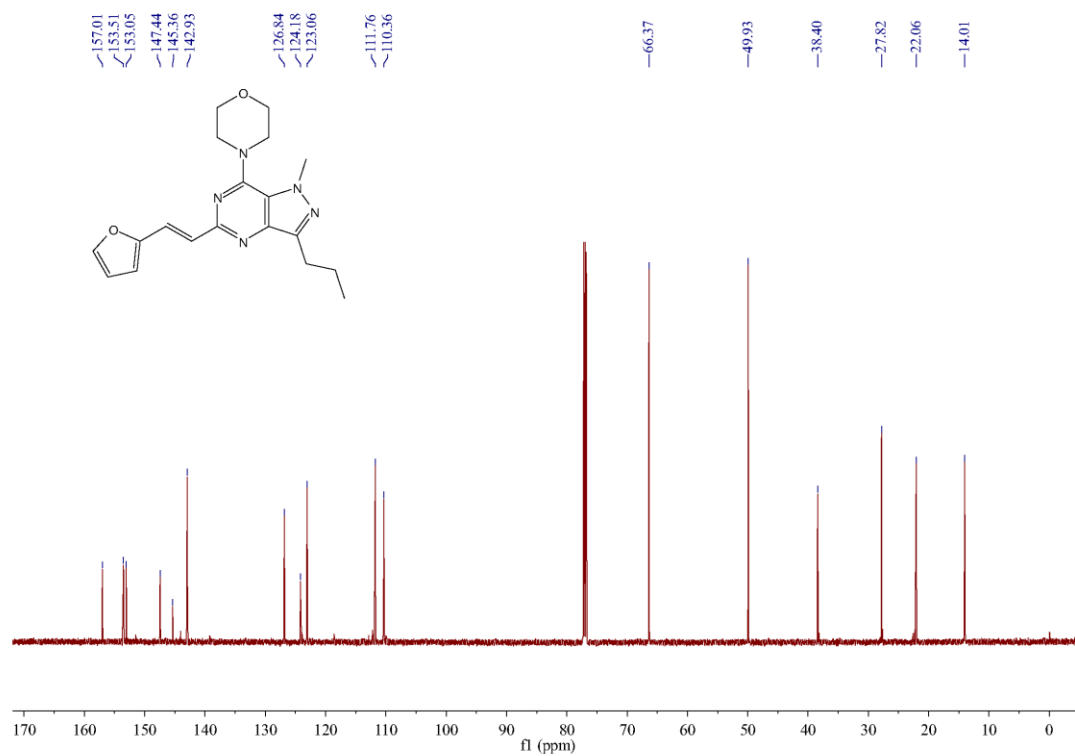

# $^1\text{H}$ NMR and $^{13}\text{C}$ NMR for **3e**

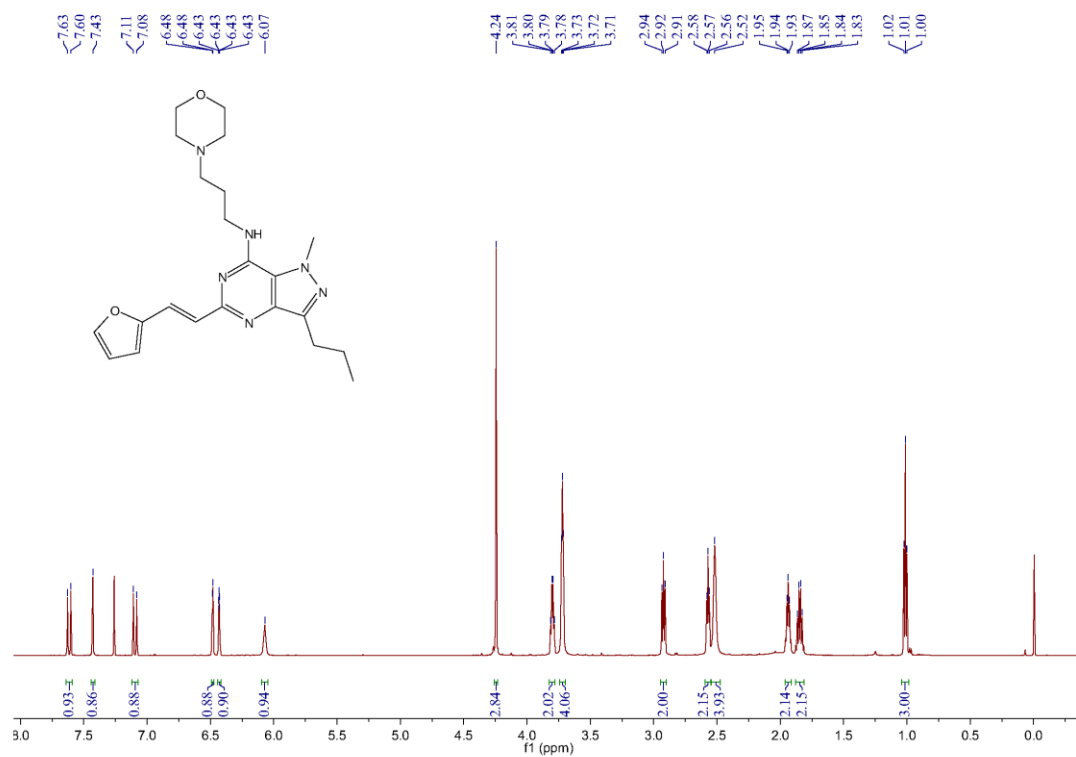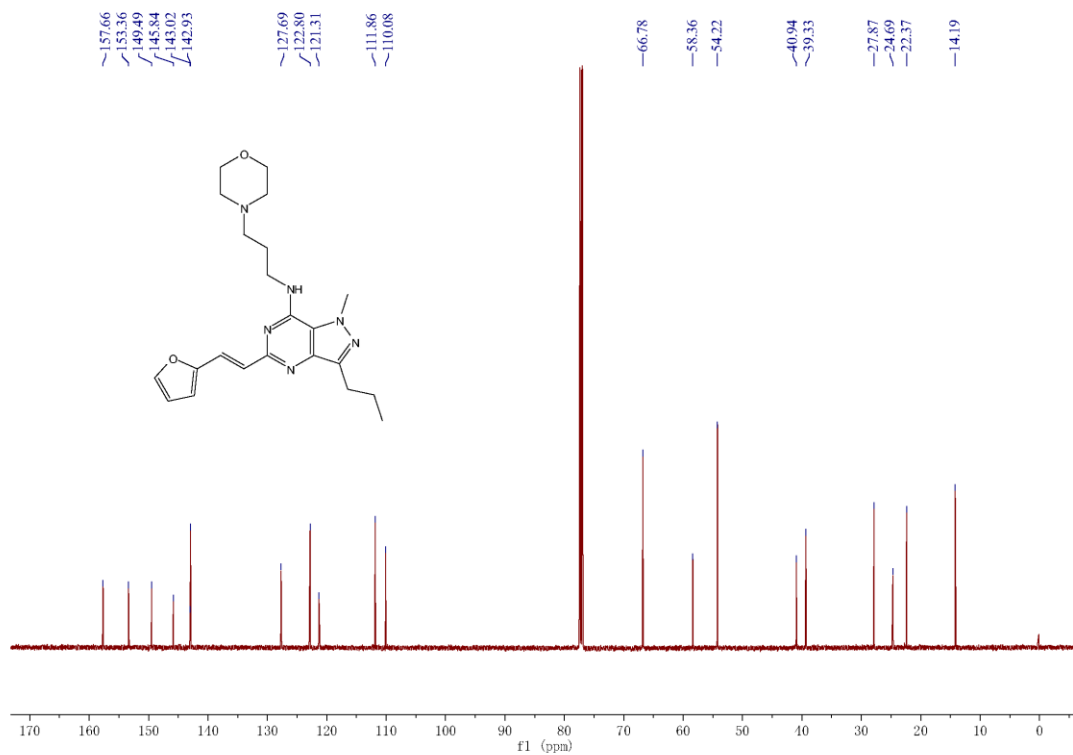

### $^1\text{H}$ NMR and $^{13}\text{C}$ NMR for 3f

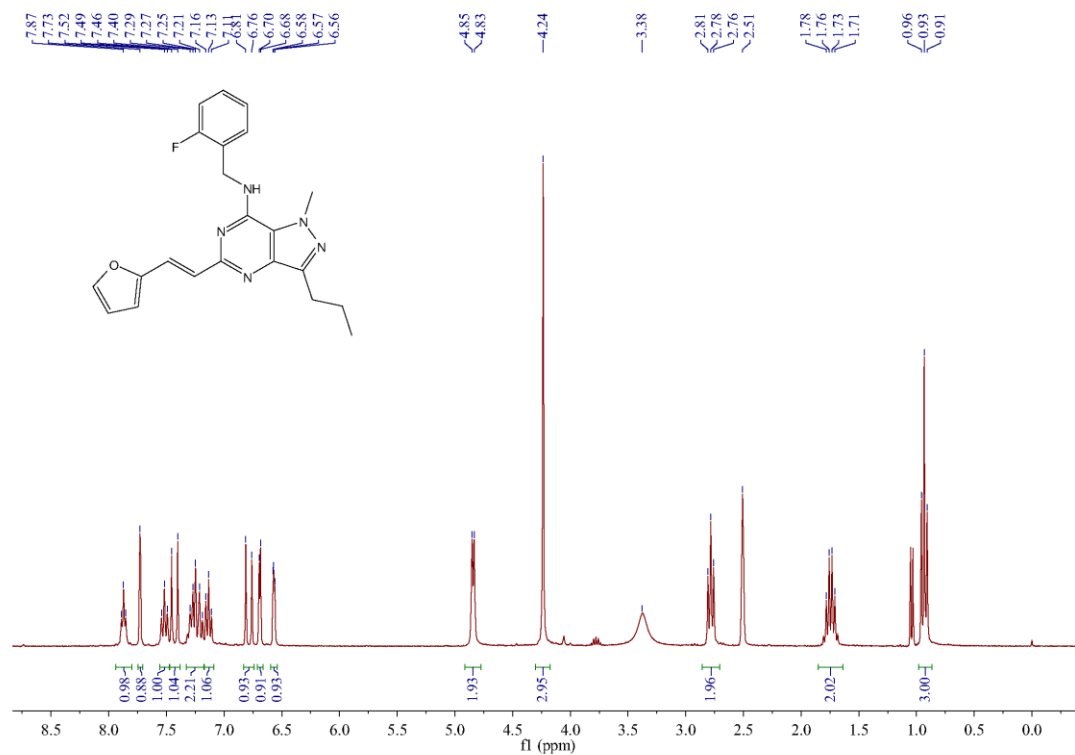

### $^1\text{H}$ NMR and $^{13}\text{C}$ NMR for 3g

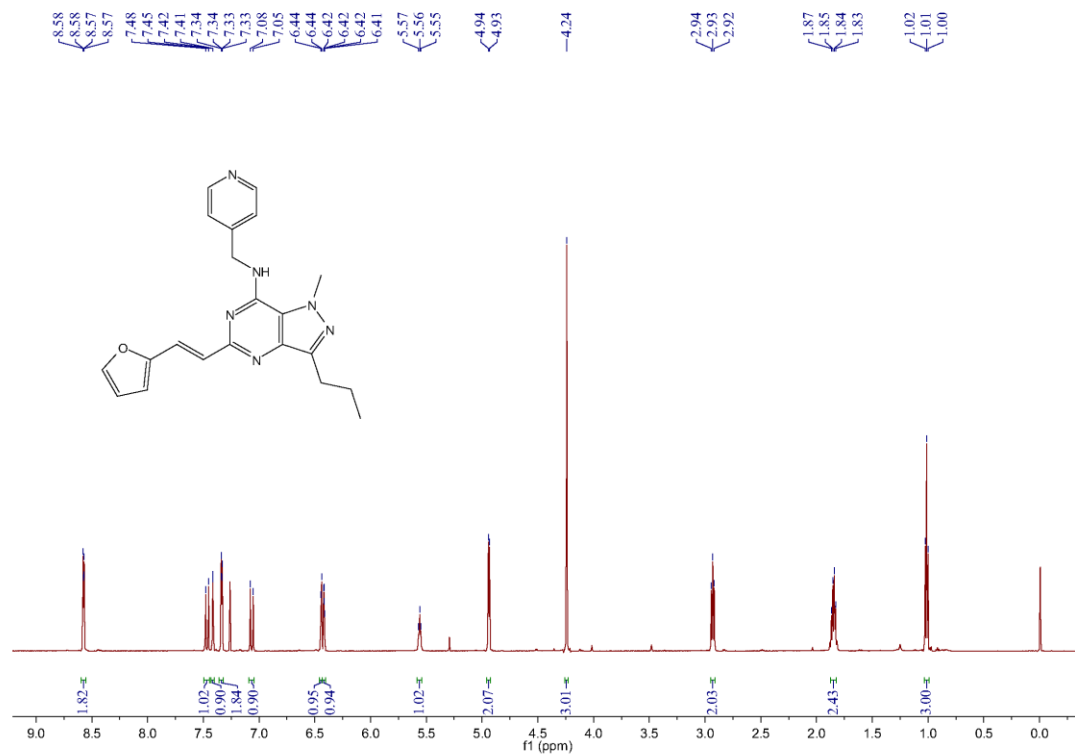

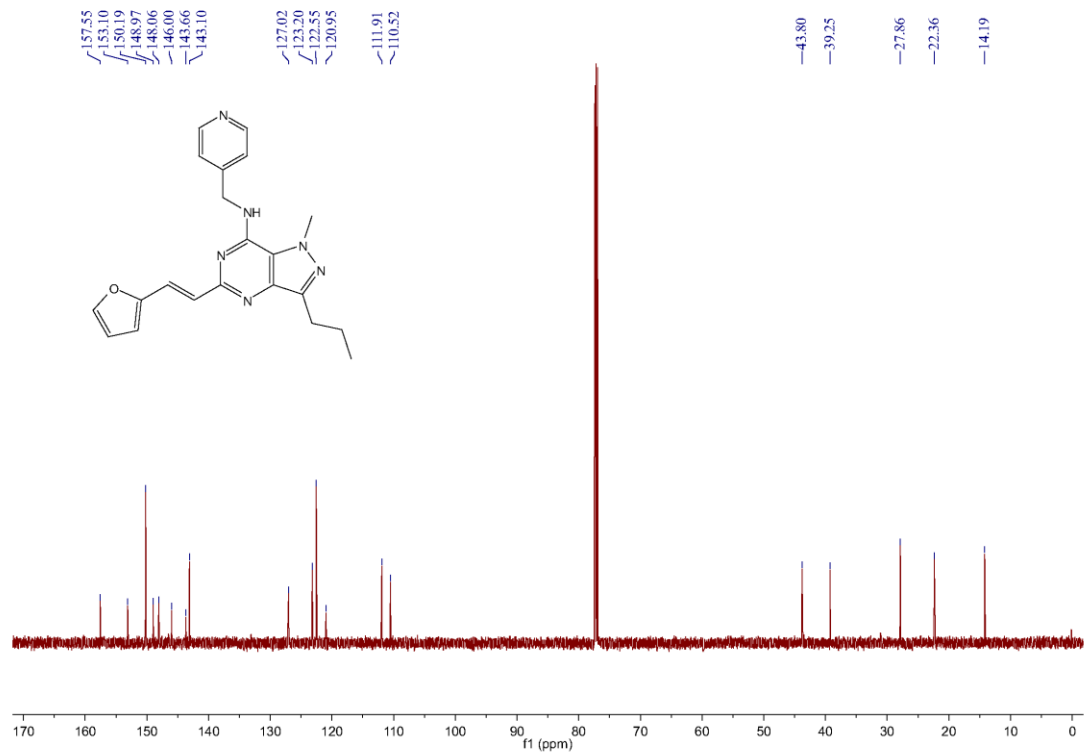

**<sup>1</sup>H NMR and <sup>13</sup>C NMR for 4a**

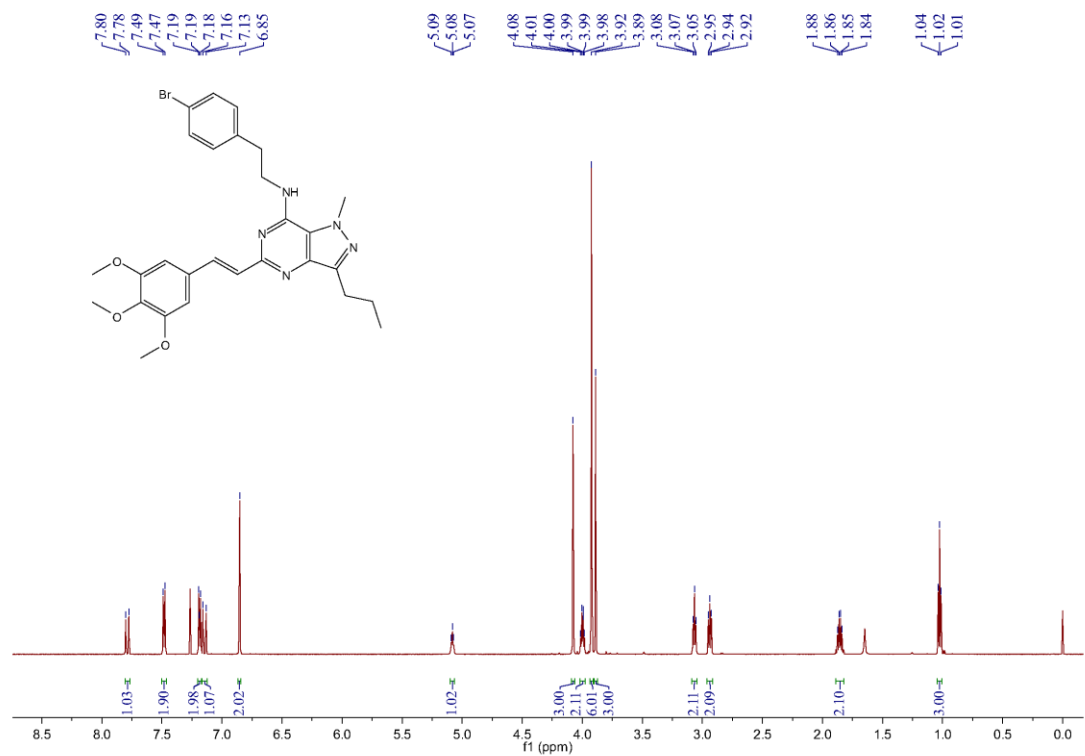

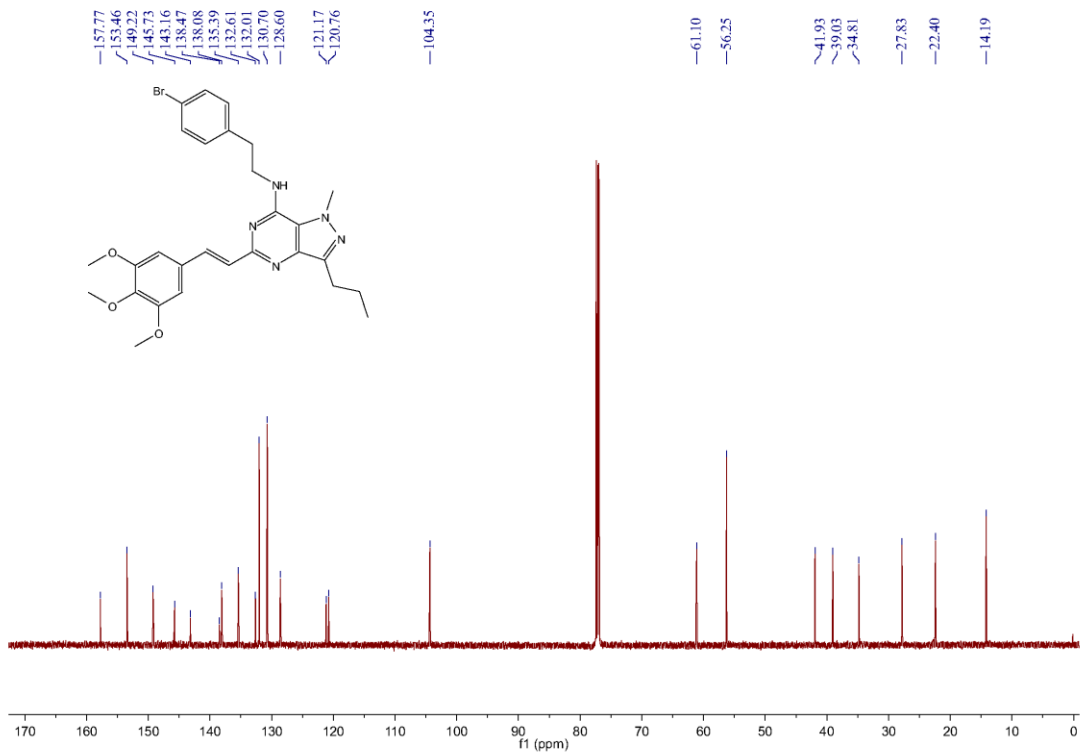

**<sup>1</sup>H NMR and <sup>13</sup>C NMR for 4b**

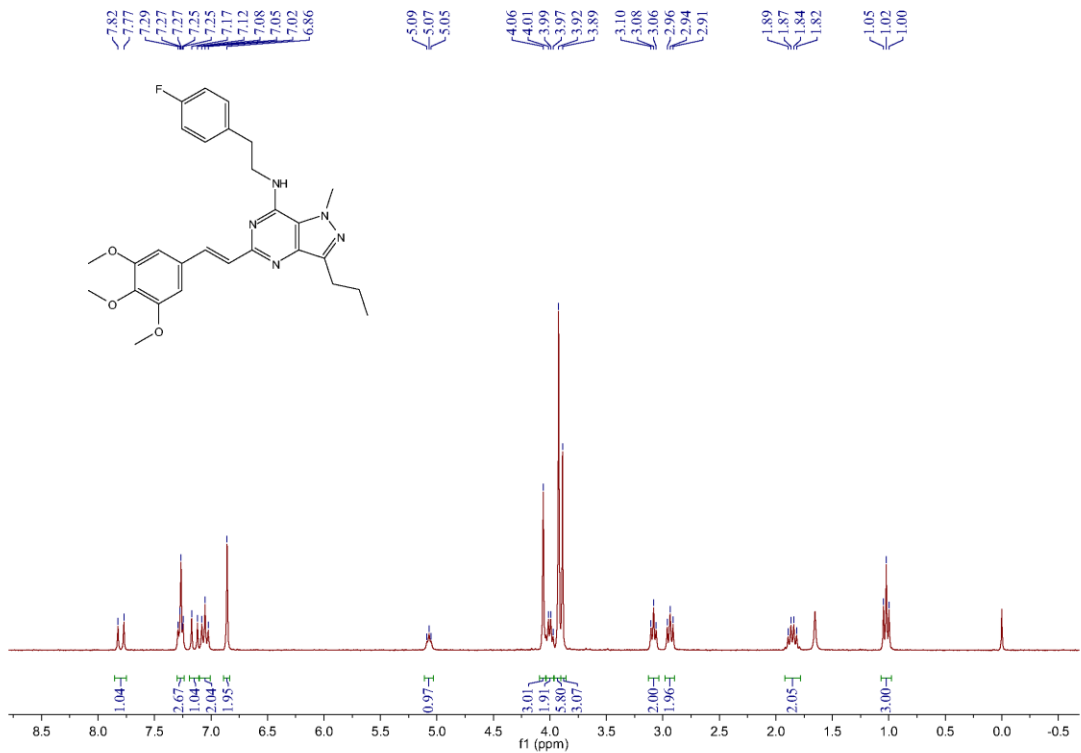



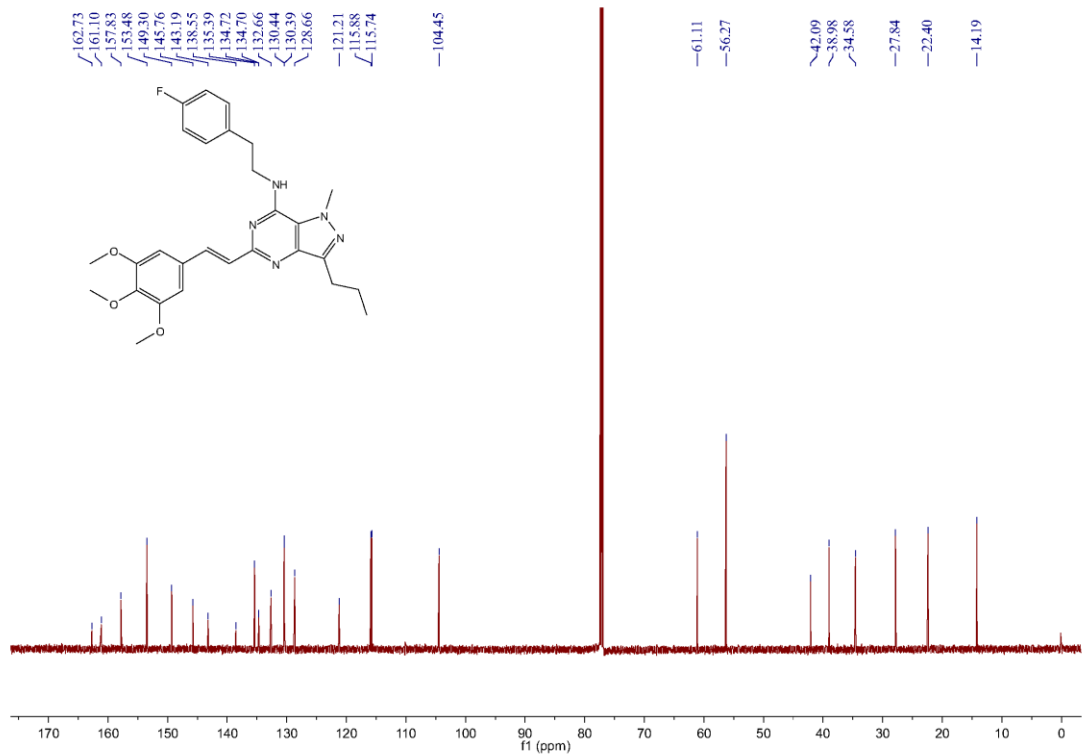

**<sup>1</sup>H NMR and <sup>13</sup>C NMR for 4c**

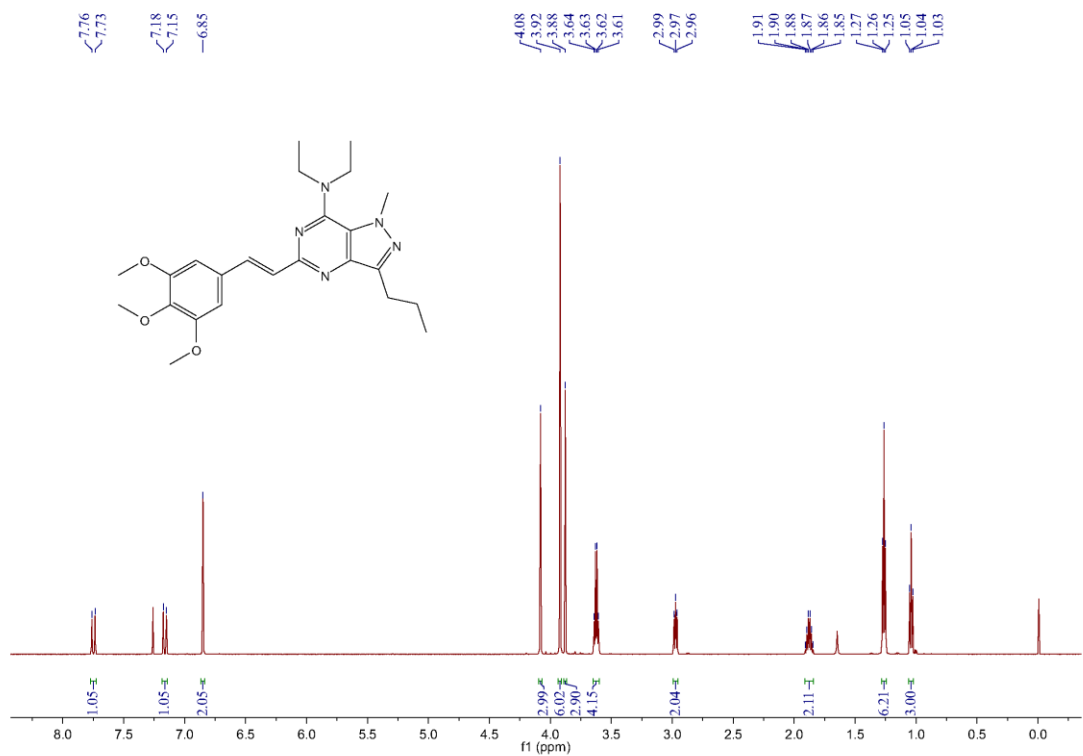

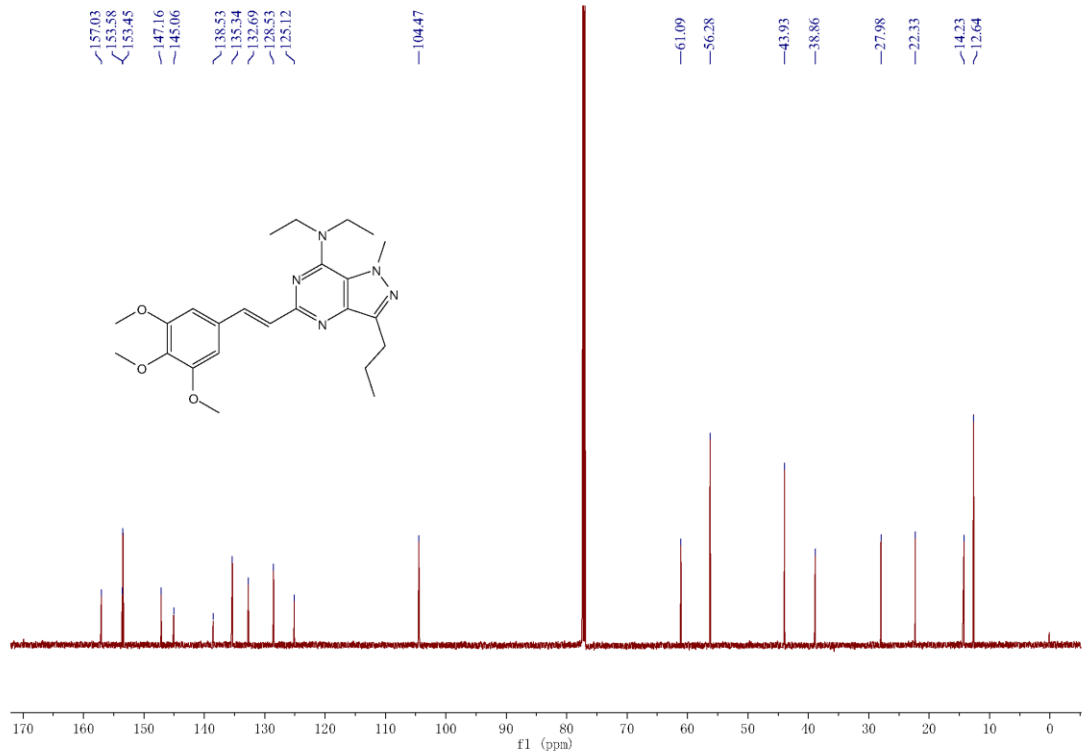

### <sup>1</sup>H NMR and <sup>13</sup>C NMR for 4d

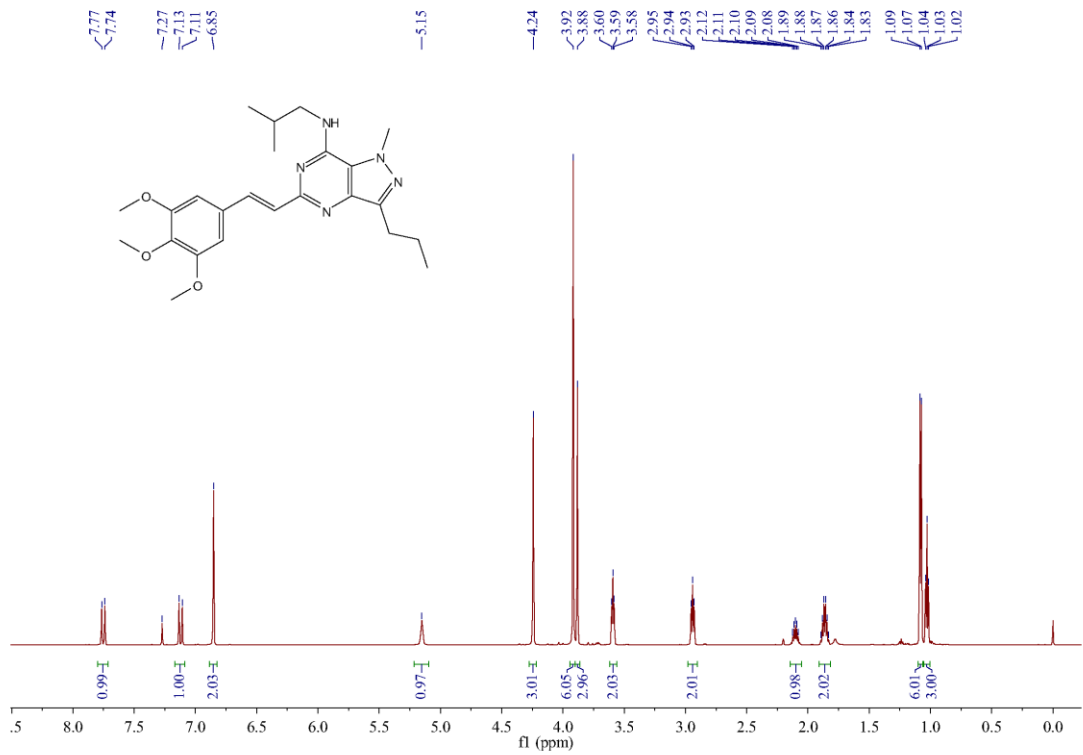

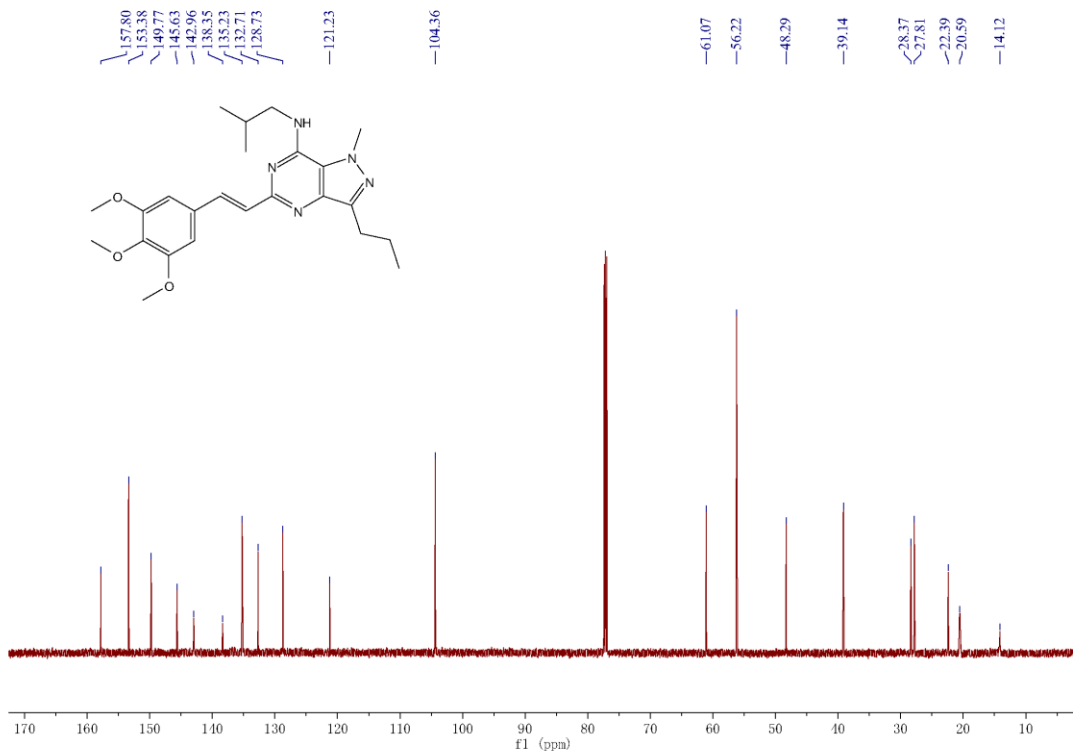

### <sup>1</sup>H NMR and <sup>13</sup>C NMR for 4e

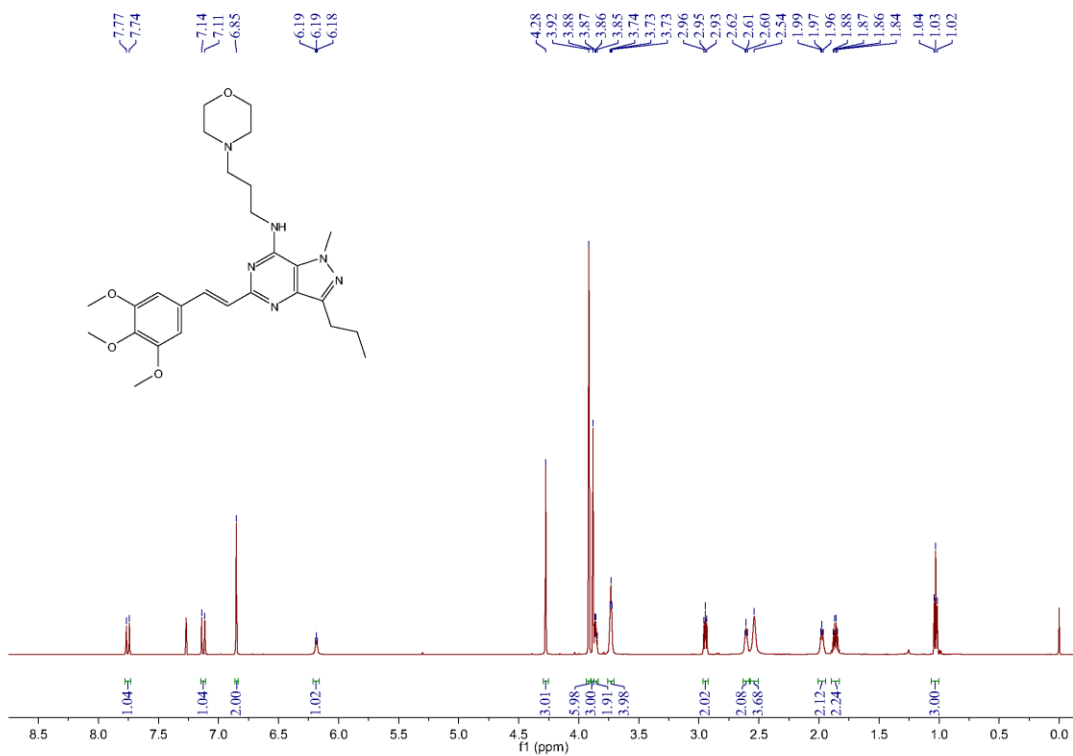

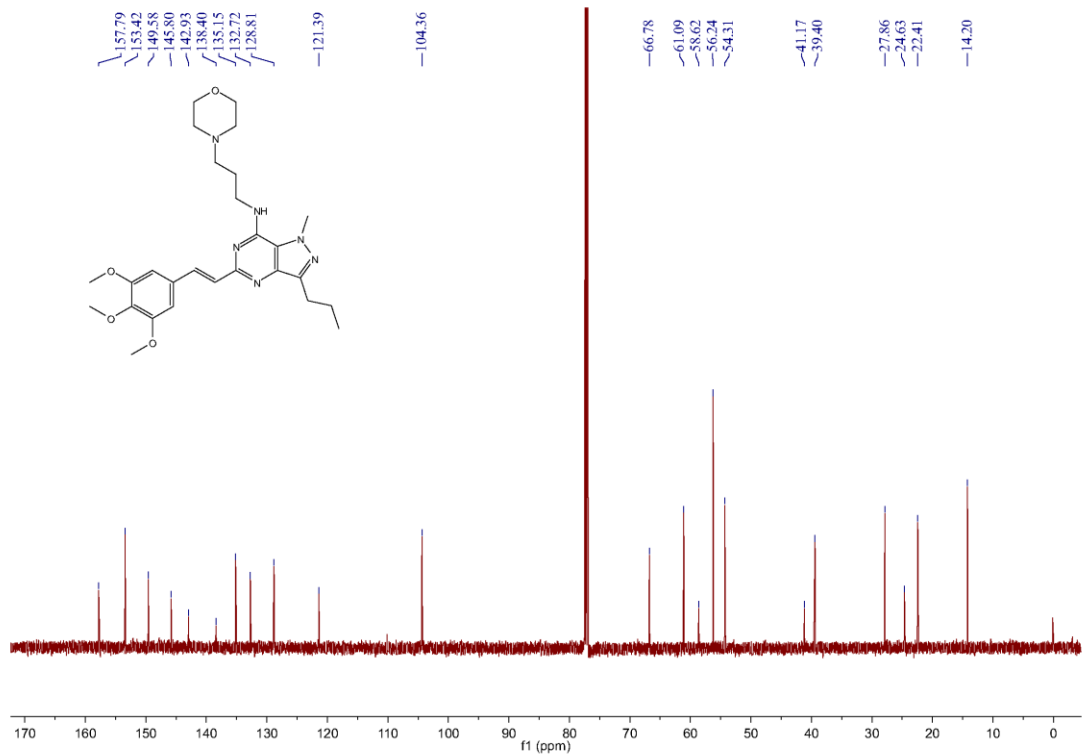

### <sup>1</sup>H NMR and <sup>13</sup>C NMR for 4f

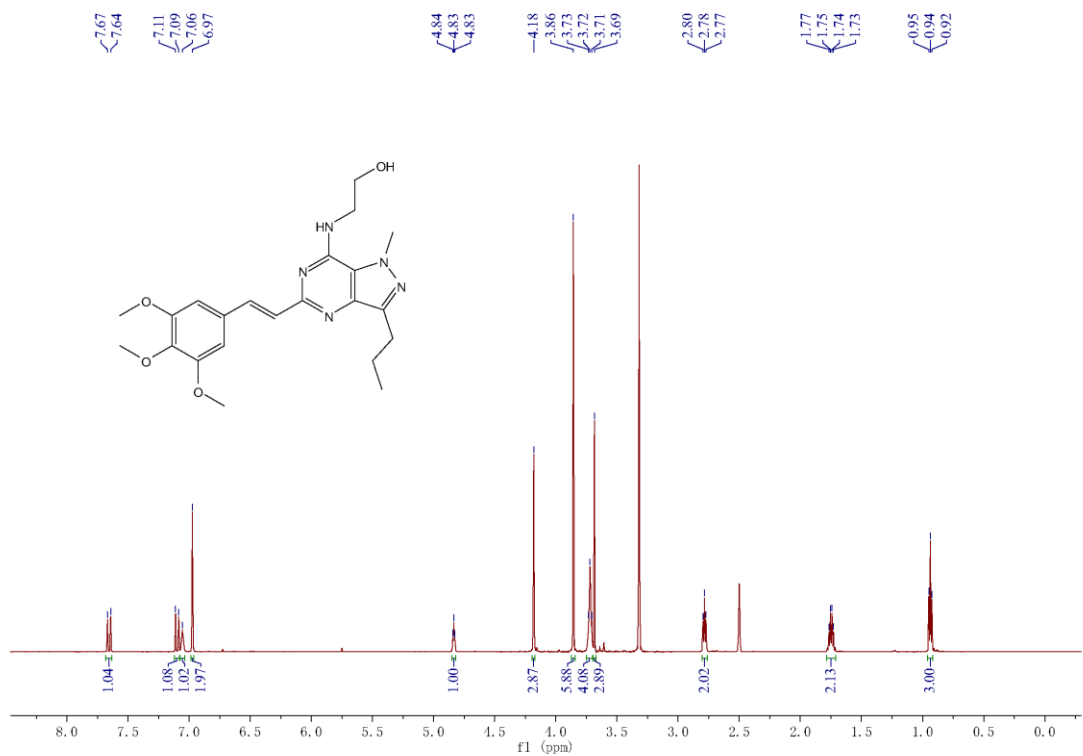

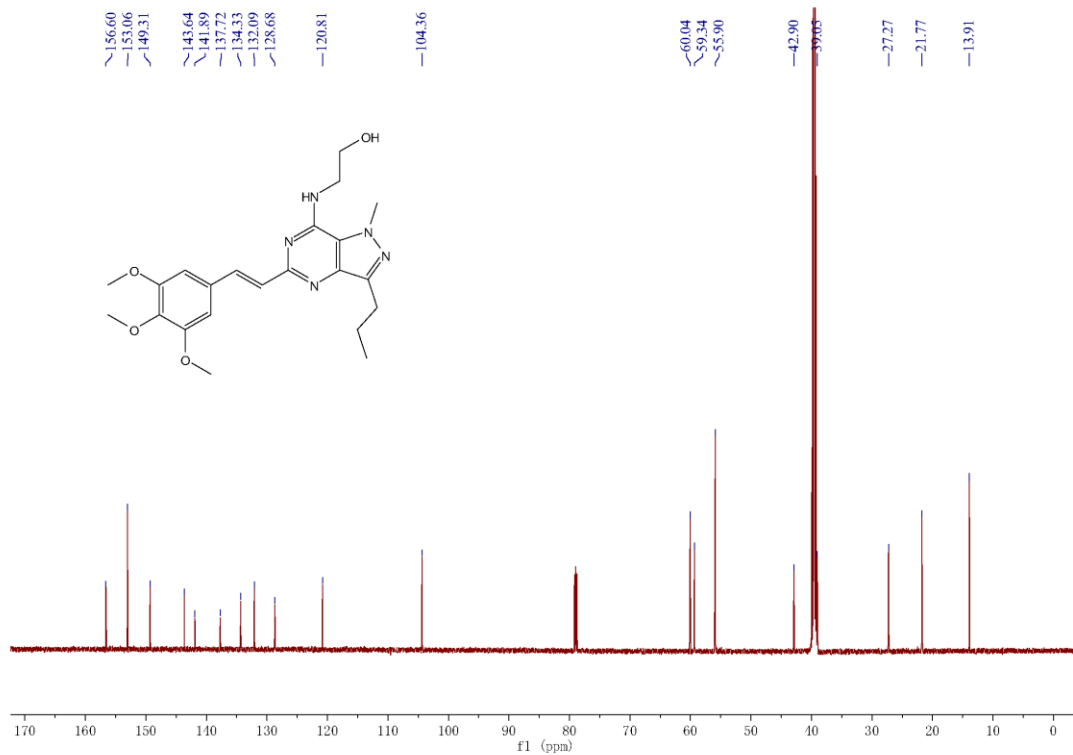

**<sup>1</sup>H NMR and <sup>13</sup>C NMR for 4g**

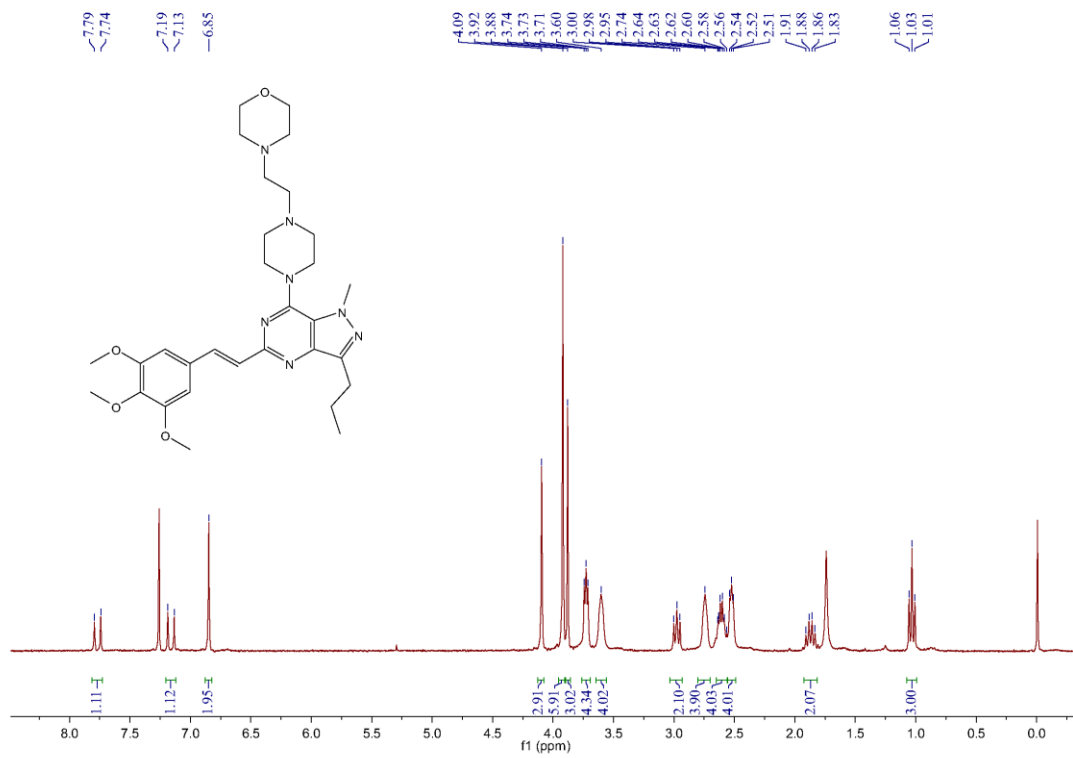

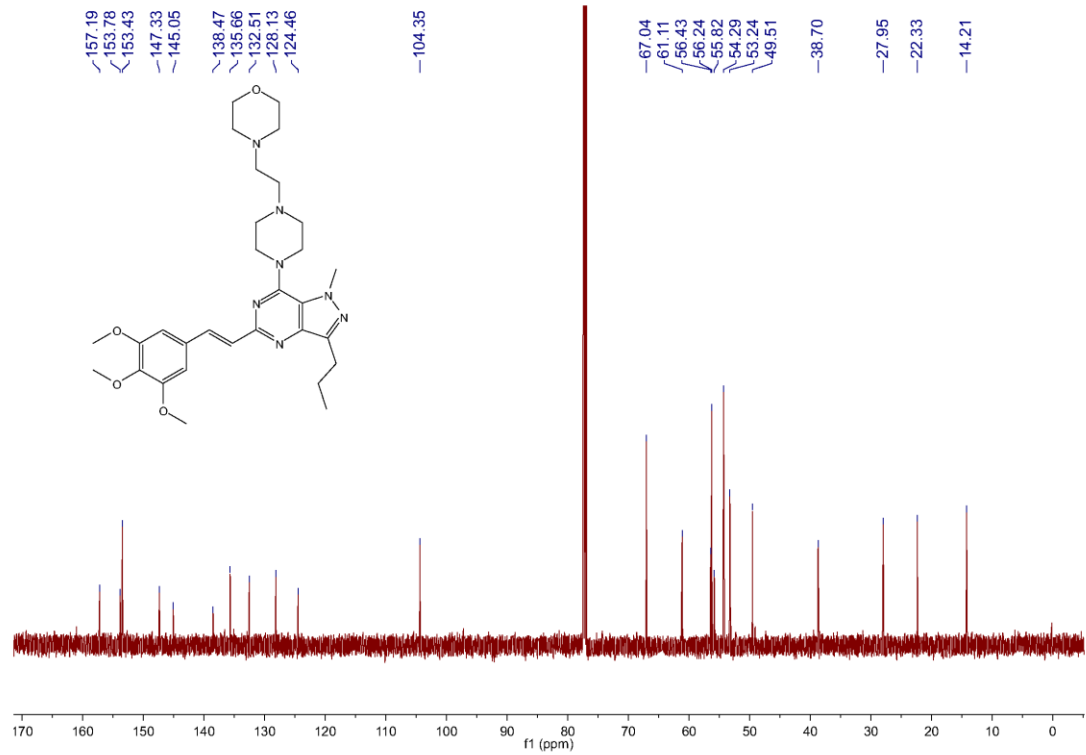

**<sup>1</sup>H NMR and <sup>13</sup>C NMR for 4h**

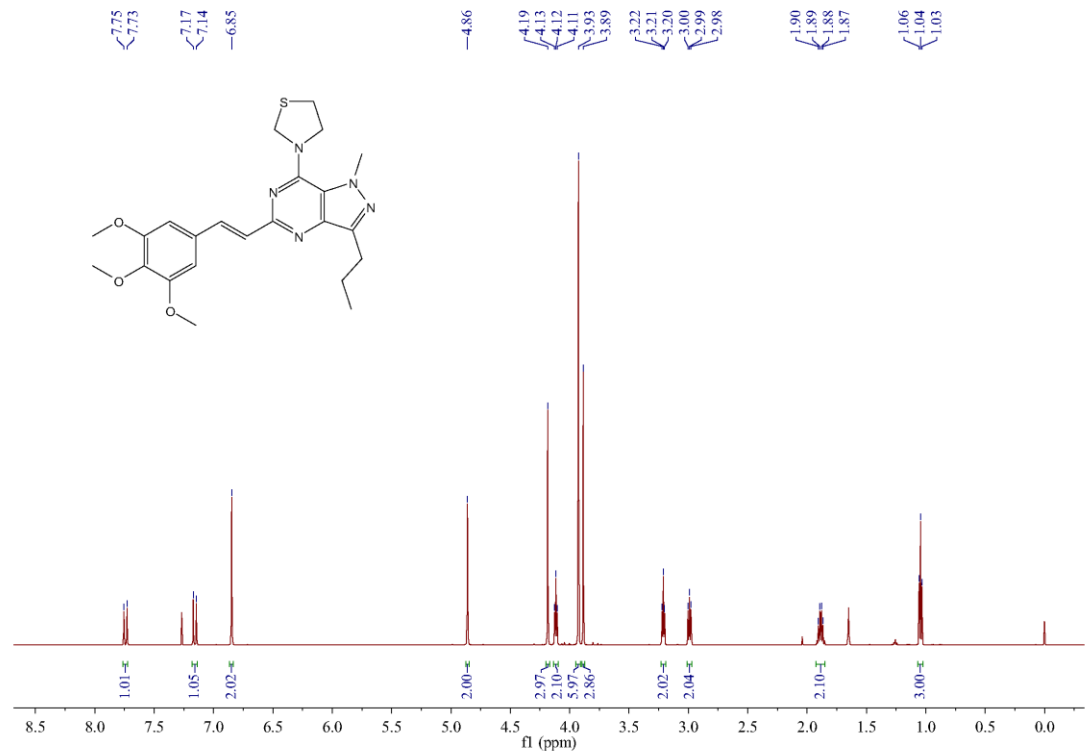

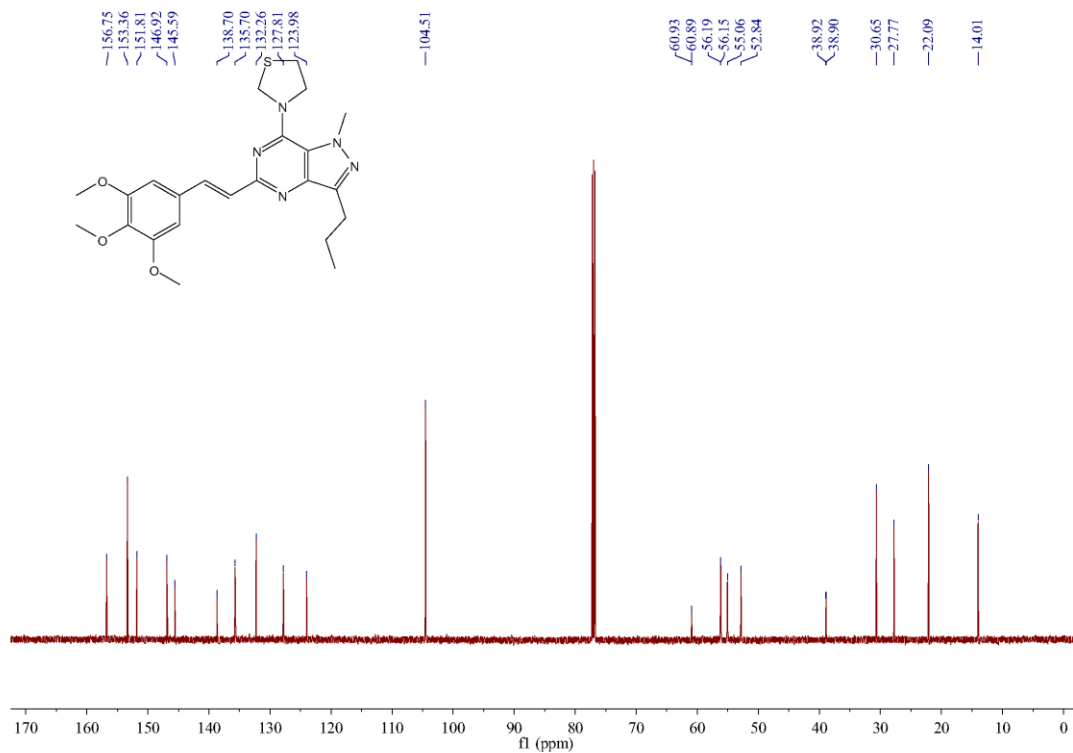

### <sup>1</sup>H NMR and <sup>13</sup>C NMR for 4i

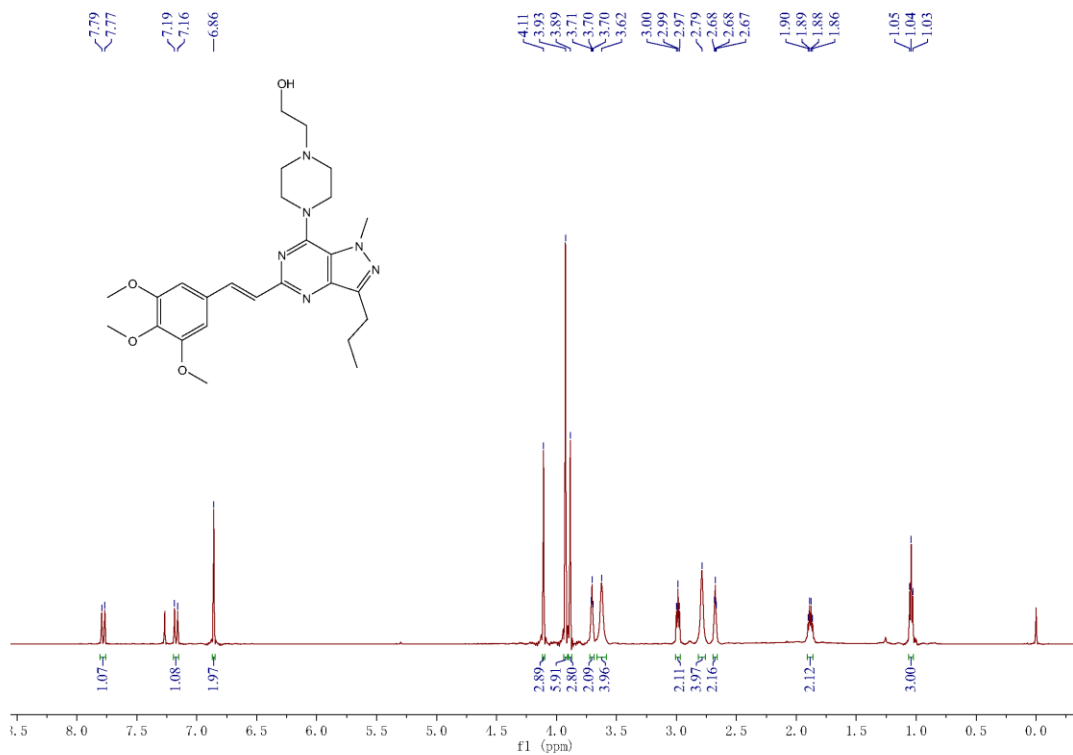

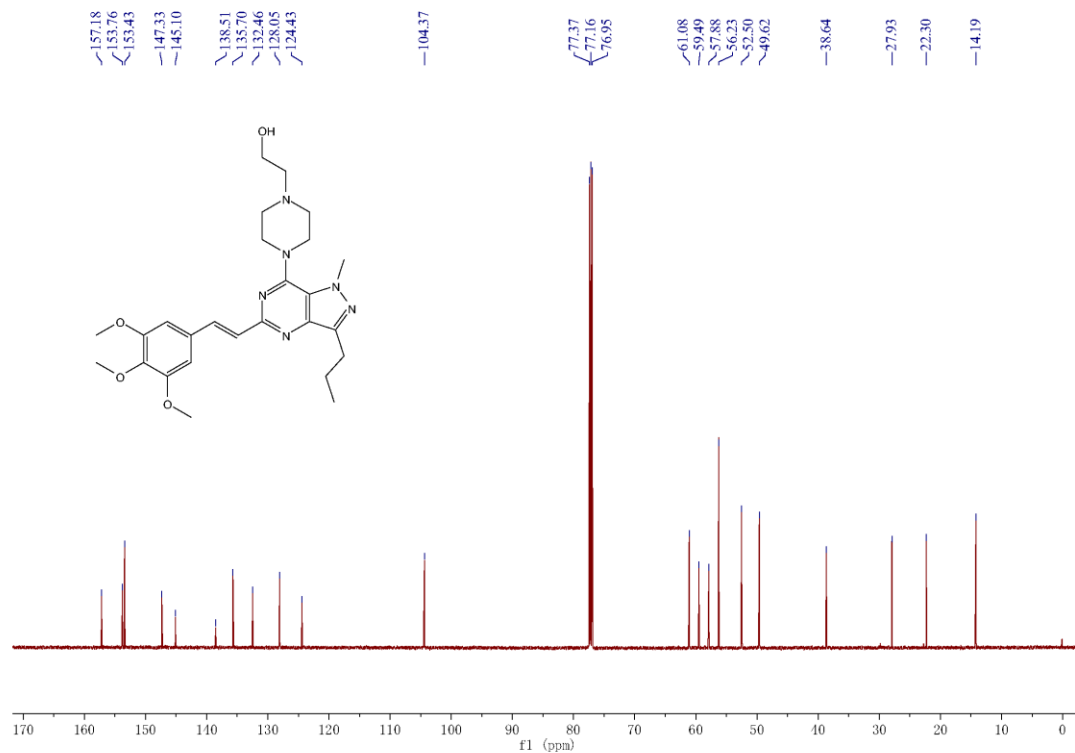

### <sup>1</sup>H NMR and <sup>13</sup>C NMR for 4j

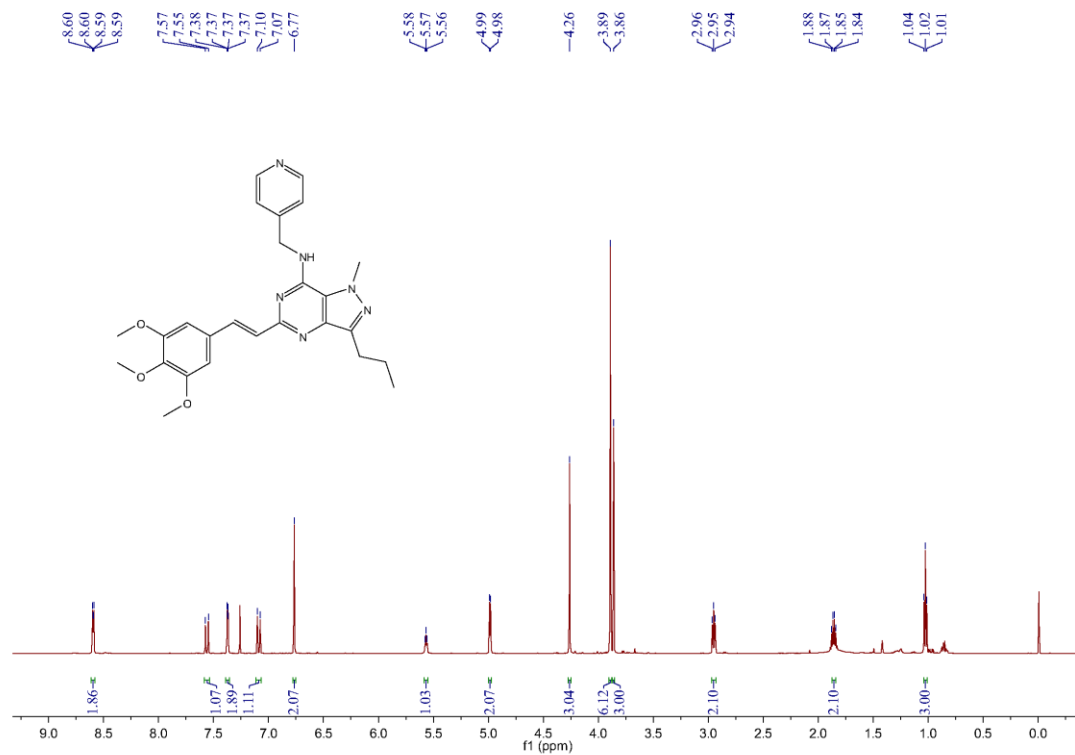



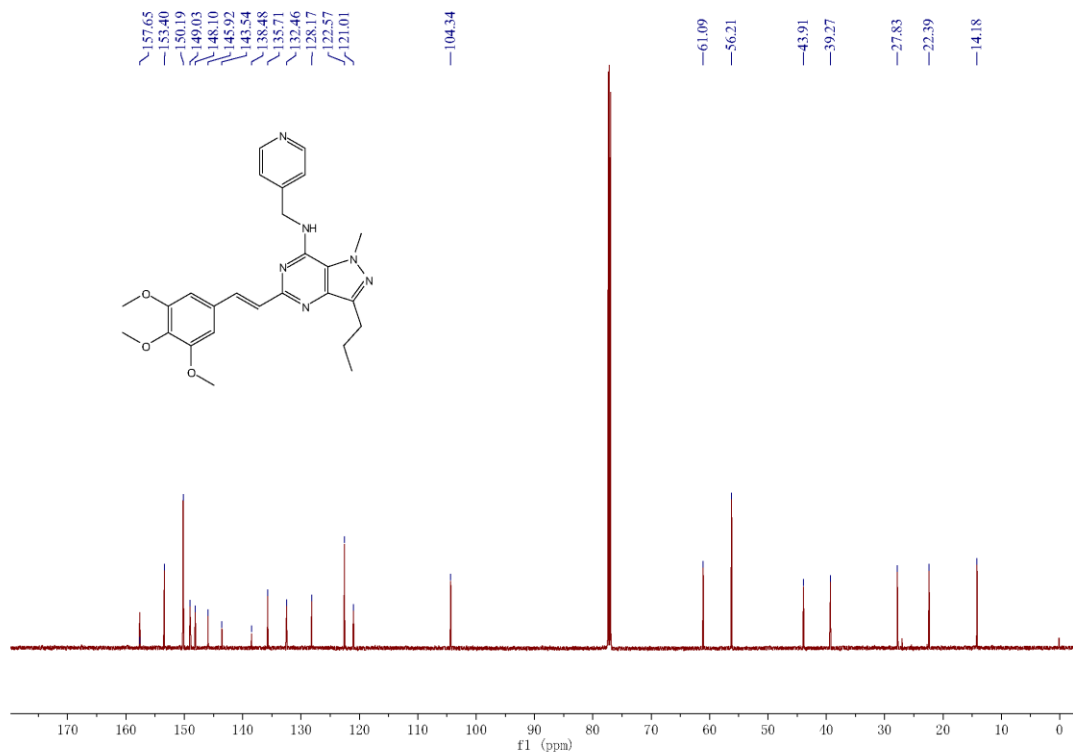

**<sup>1</sup>H NMR and <sup>13</sup>C NMR for 4k**

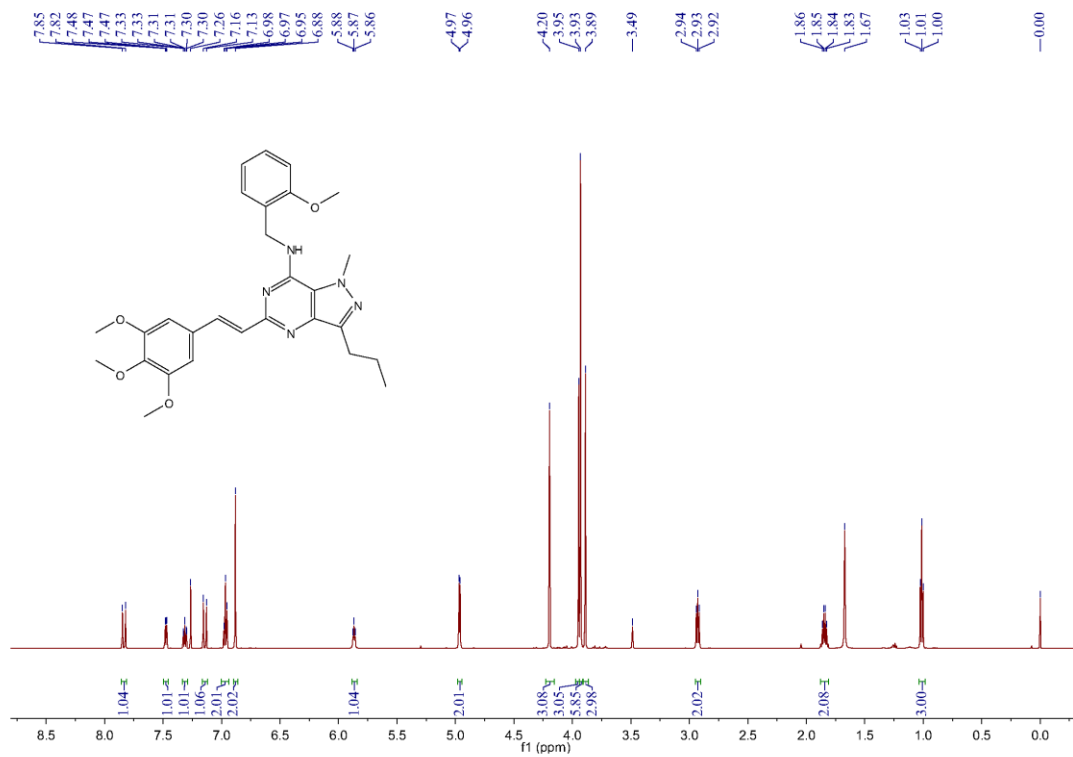

### PART 3. HR-MS data of 1a~1j, 2a~2g, 3a~3g and 4a~4k.

#### HR-MS data for 1a

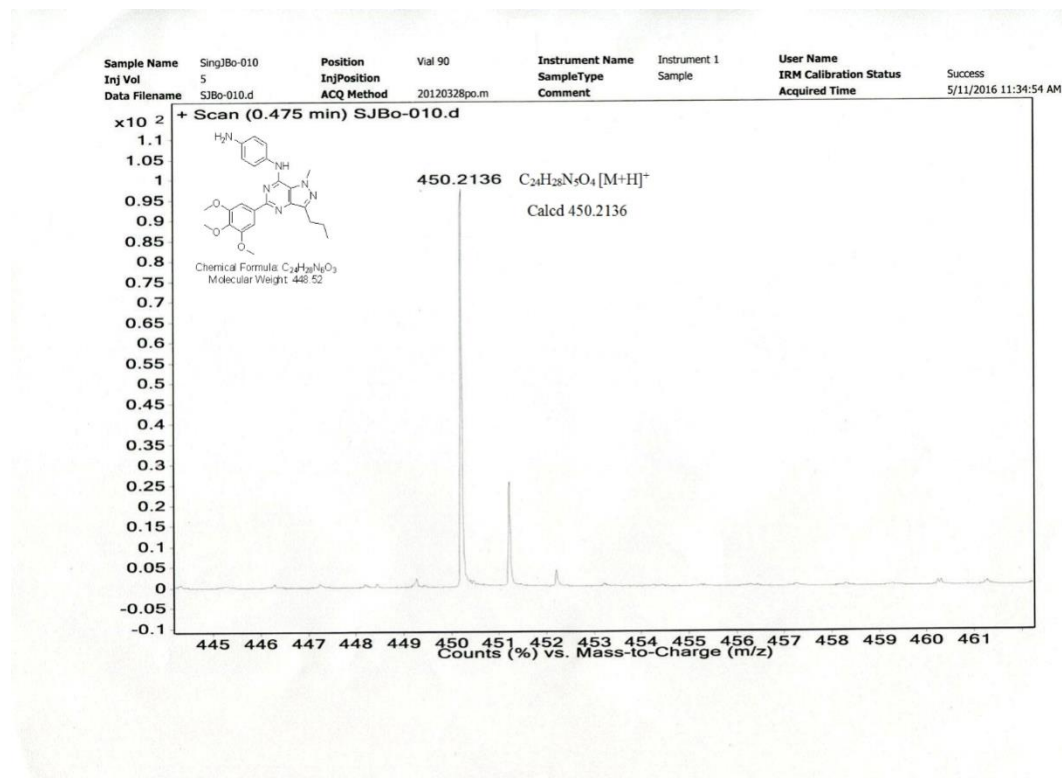

#### HR-MS data for 1b

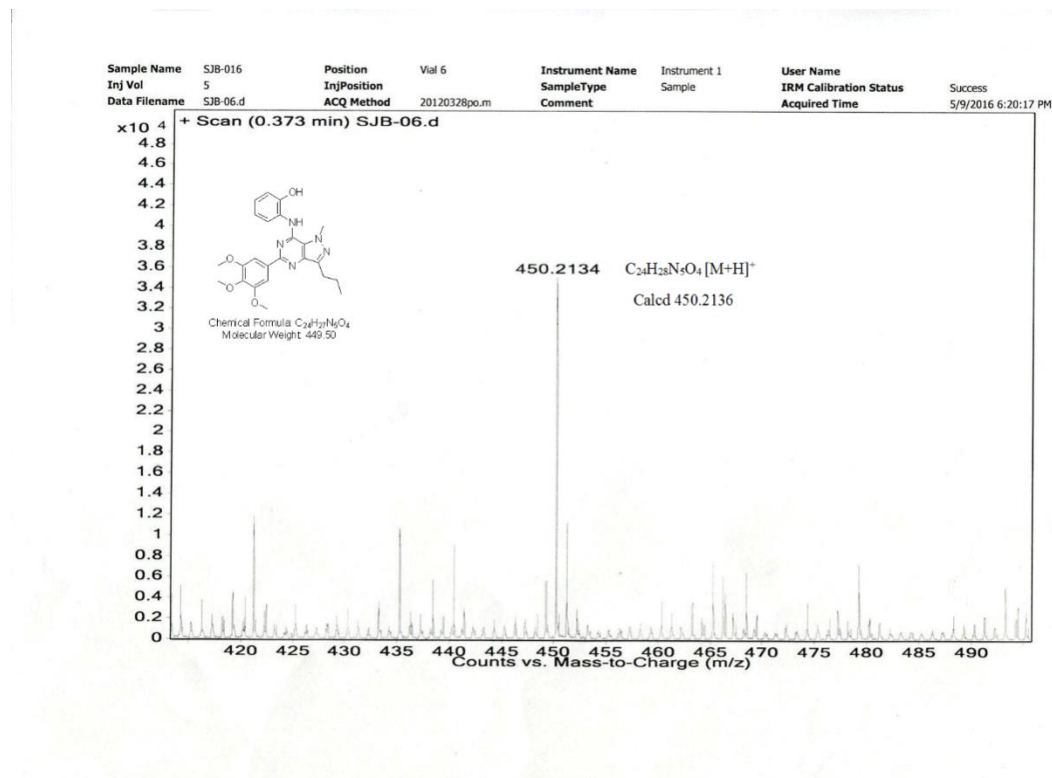

## HR-MS data for *1c*

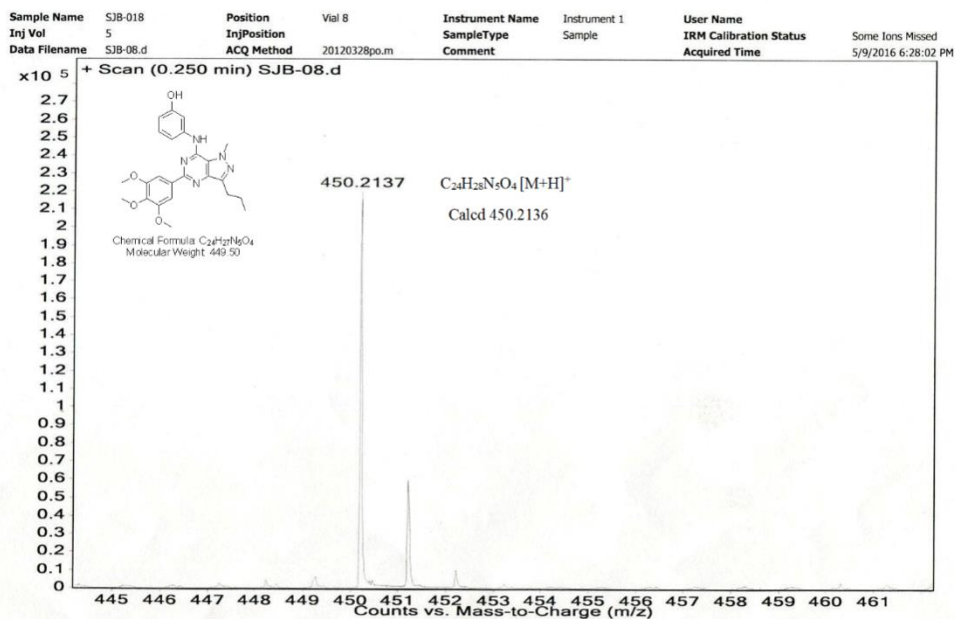

## HR-MS data for *1d*

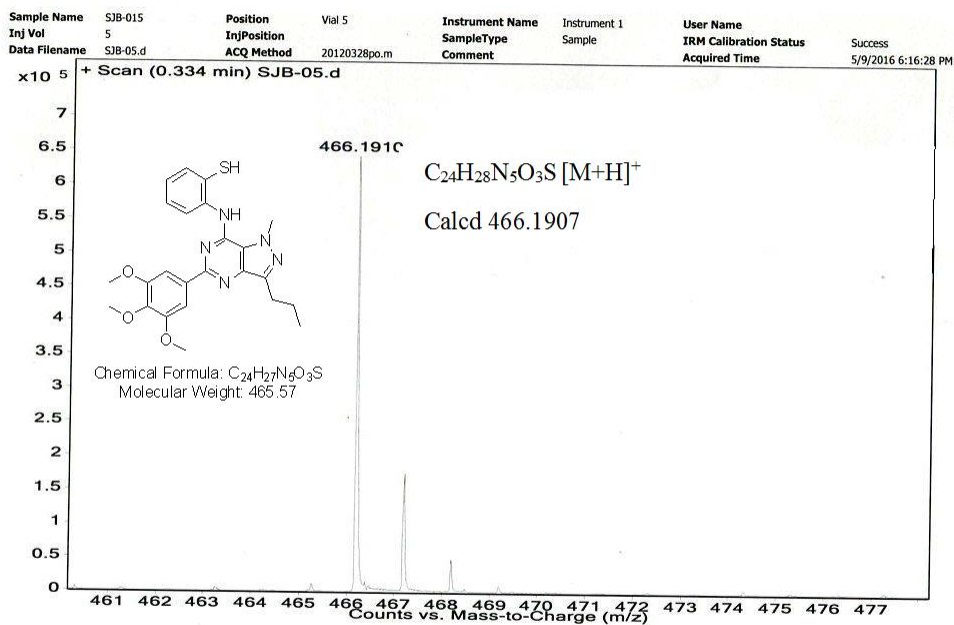

## HR-MS data for *Ie*

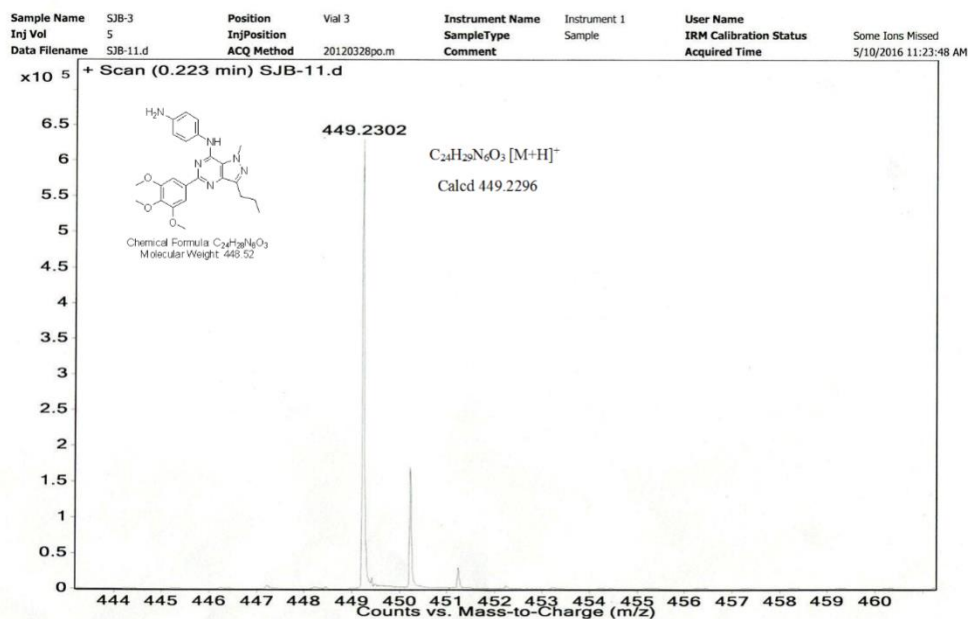

## HR-MS data for *If*

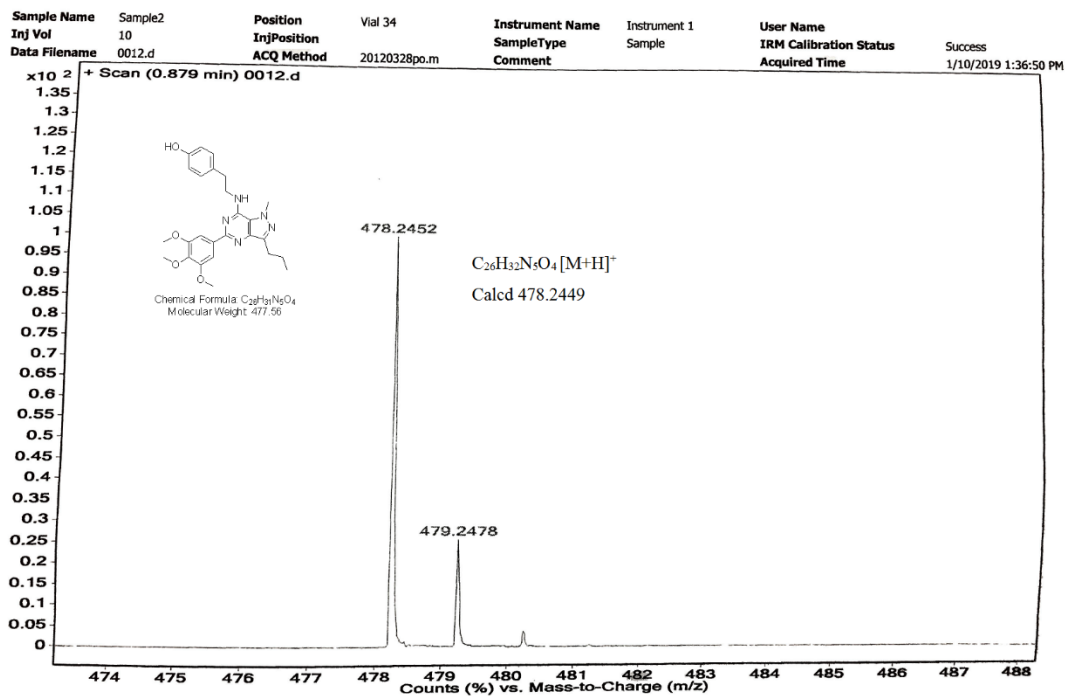

## HR-MS data for *Ig*

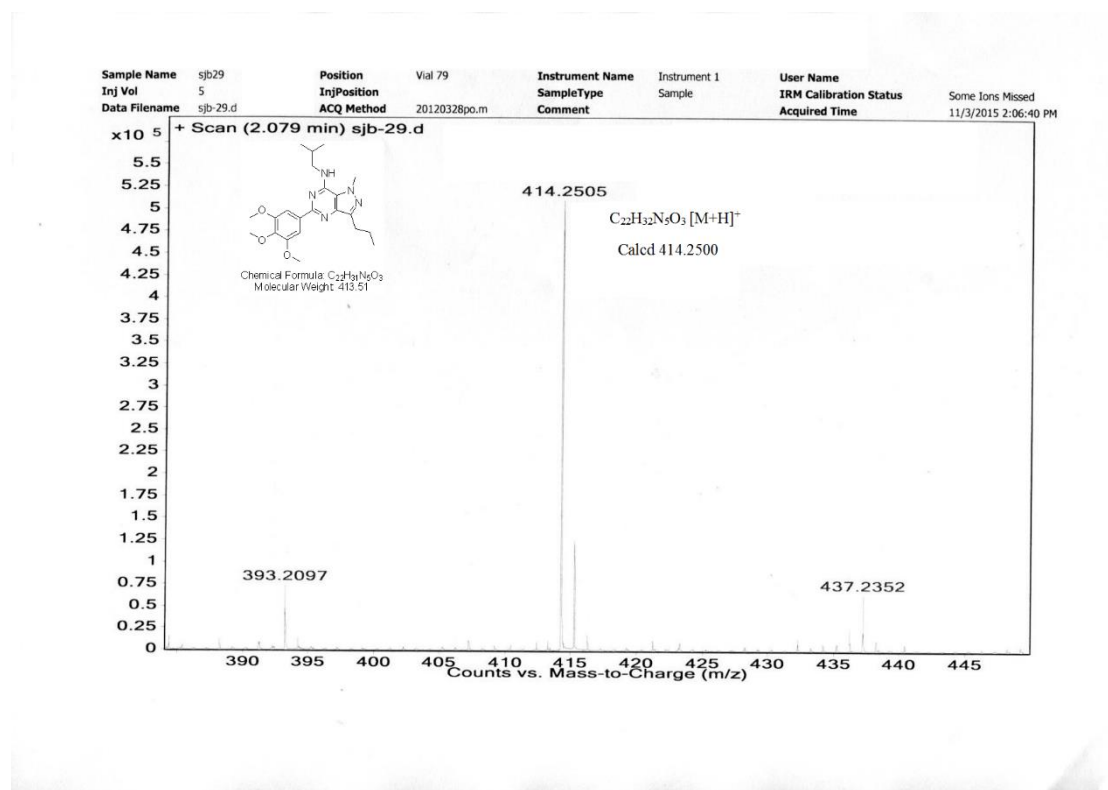

## HR-MS data for *Ih*

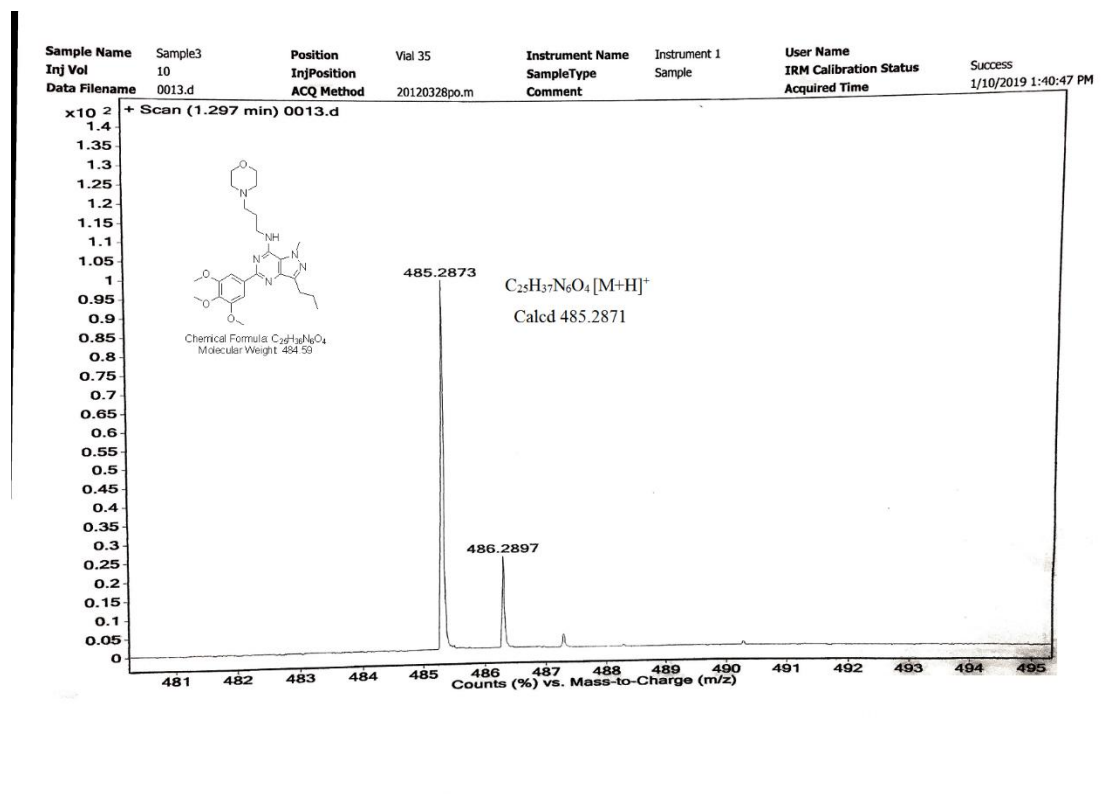

## HR-MS data for *li*

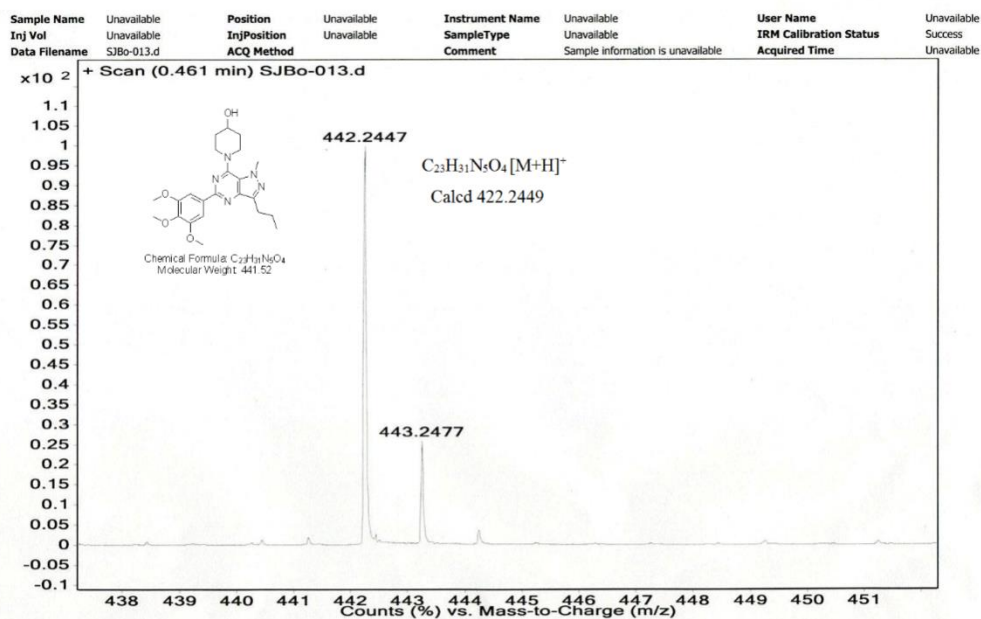

## HR-MS data for *lj*

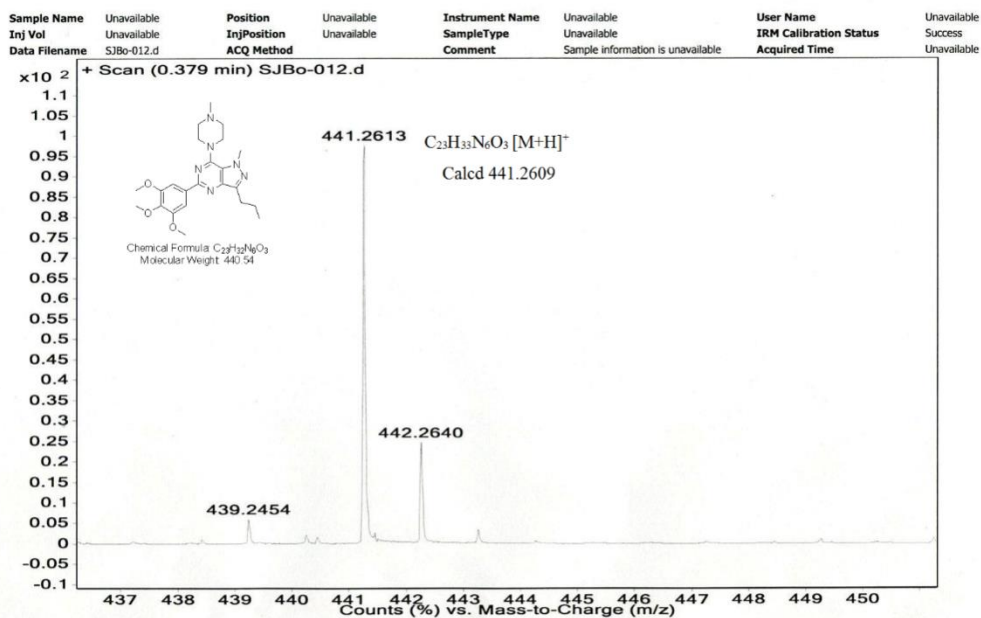

## HR-MS data for 2a

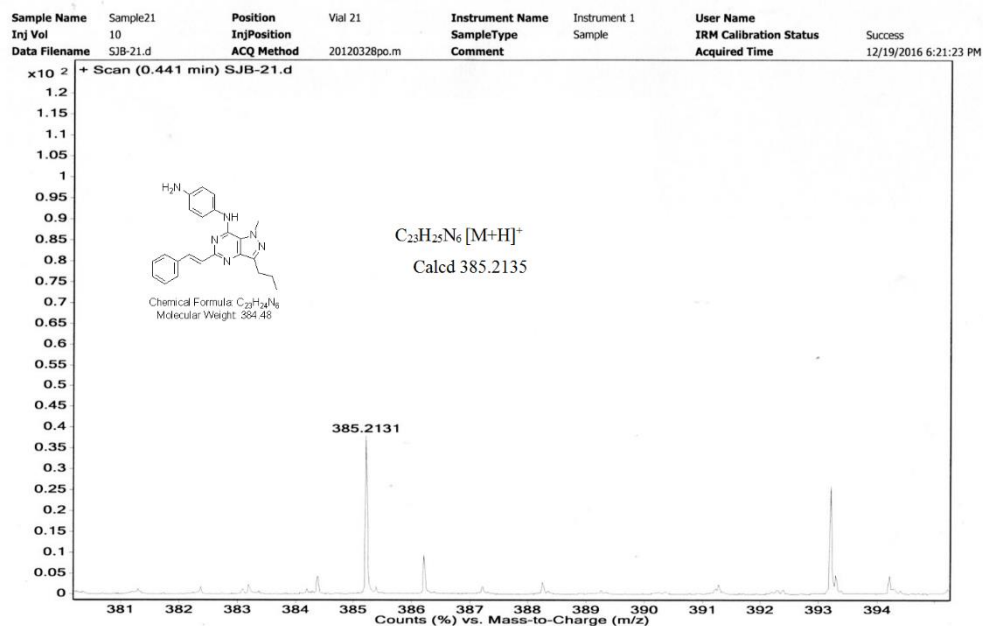

## HR-MS data for 2b

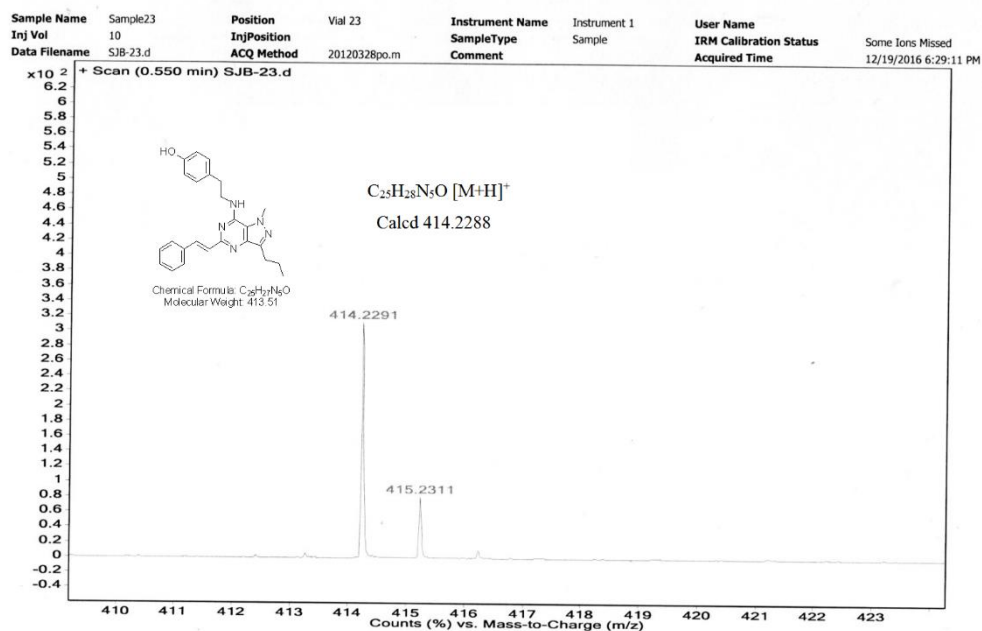

## HR-MS data for 2c

|               |          |             |              |                 |              |                        |                       |
|---------------|----------|-------------|--------------|-----------------|--------------|------------------------|-----------------------|
| Sample Name   | WBS1     | Position    | Vial 1       | Instrument Name | Instrument 1 | User Name              |                       |
| Inj Vol       | 10       | InjPosition |              | SampleType      | Sample       | IRM Calibration Status | Some Ions Missed      |
| Data Filename | WBS-01.d | ACQ Method  | 20120328po.m | Comment         |              | Acquired Time          | 5/27/2017 11:49:49 AM |

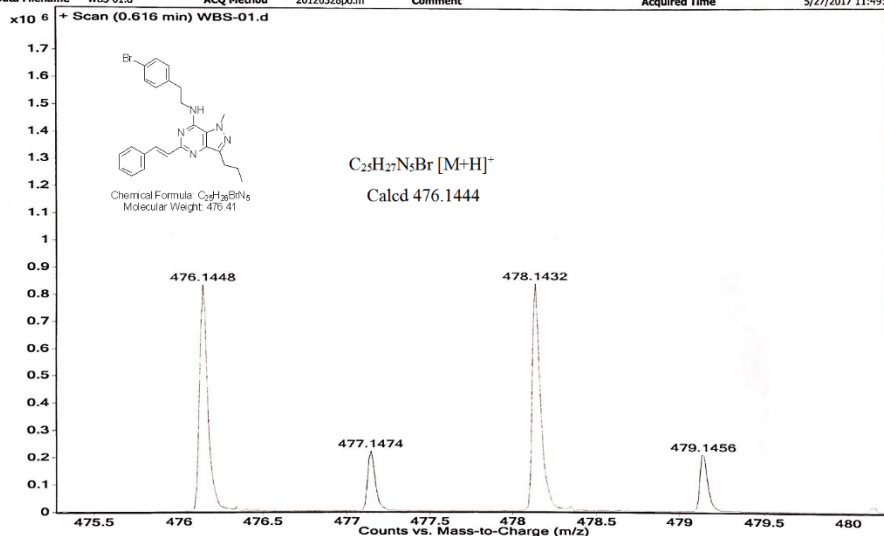

## HR-MS data for 2d

|               |             |             |              |                 |              |                        |                      |
|---------------|-------------|-------------|--------------|-----------------|--------------|------------------------|----------------------|
| Sample Name   | SingJB-012  | Position    | Vial 29      | Instrument Name | Instrument 1 | User Name              |                      |
| Inj Vol       | 5           | InjPosition |              | SampleType      | Sample       | IRM Calibration Status | Success              |
| Data Filename | SingJB-02.d | ACQ Method  | 20120328po.m | Comment         |              | Acquired Time          | 5/10/2016 4:54:18 PM |

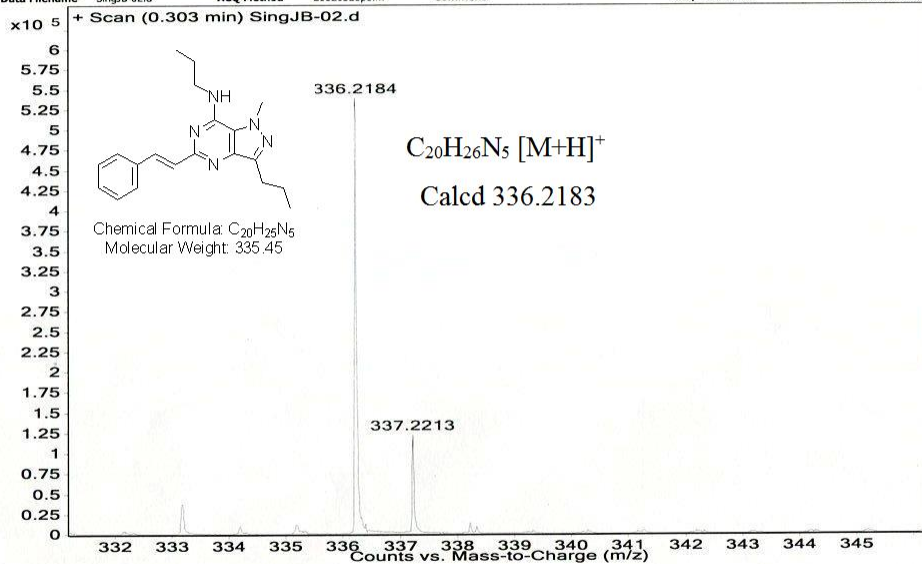



## HR-MS data for 2e

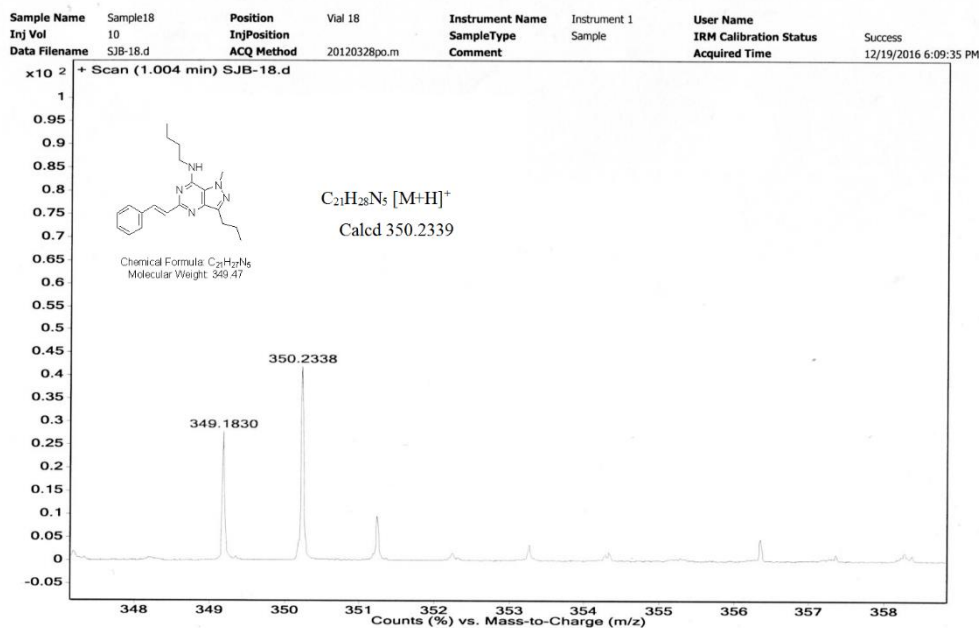

## HR-MS data for 2f

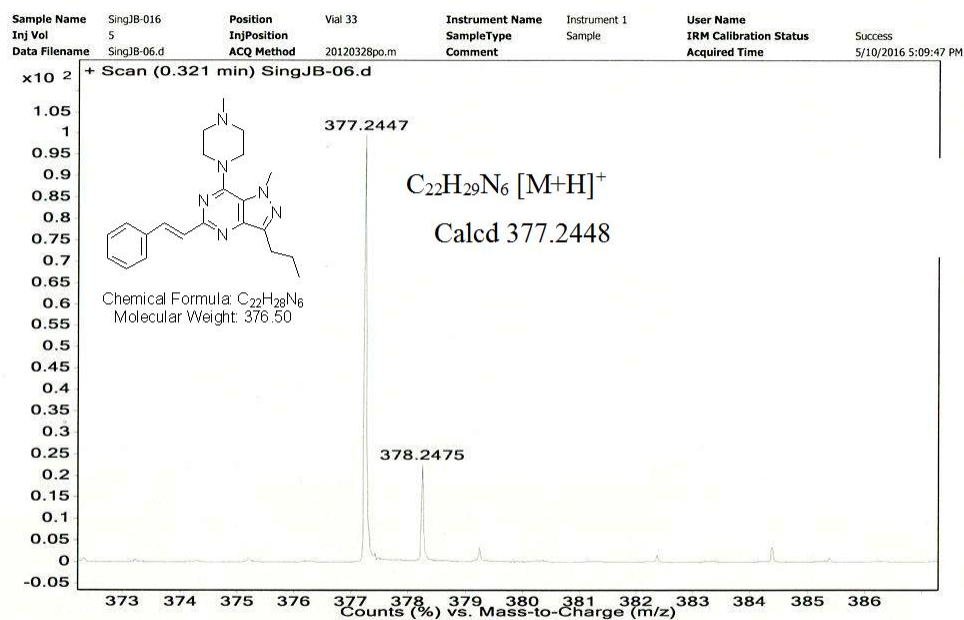

## HR-MS data for 2g

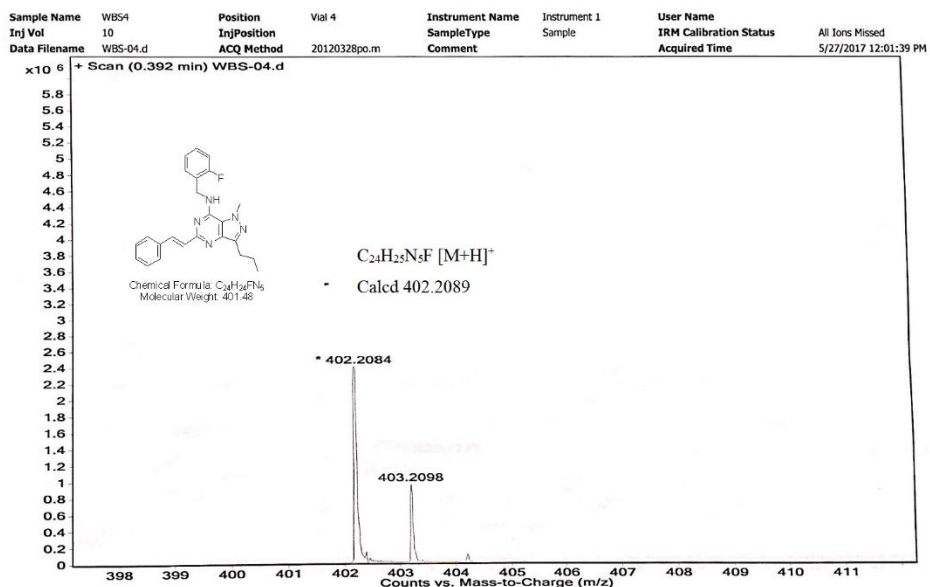

## HR-MS data for 3a

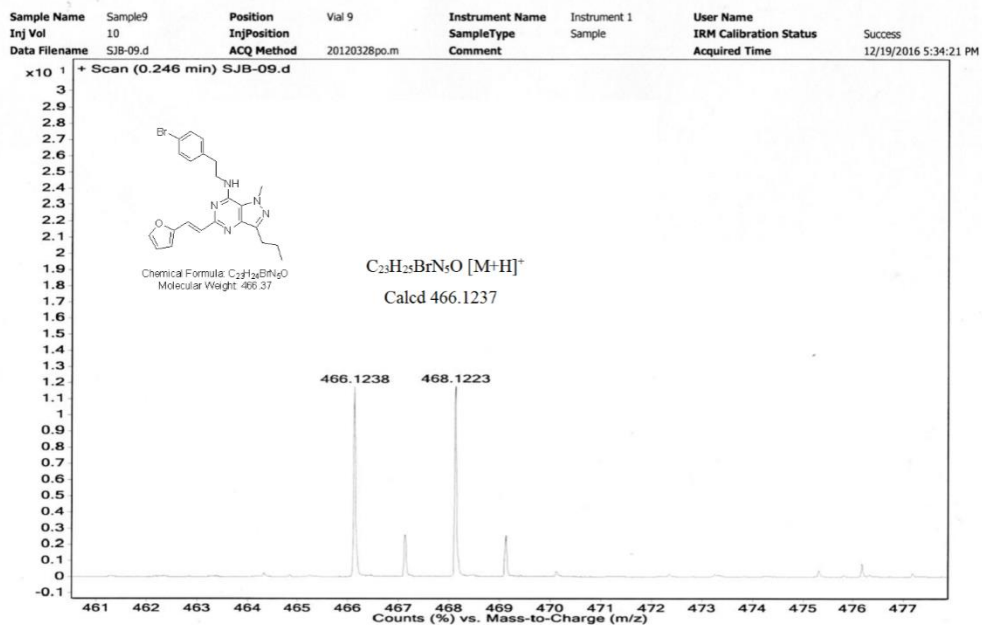

## HR-MS data for 3b

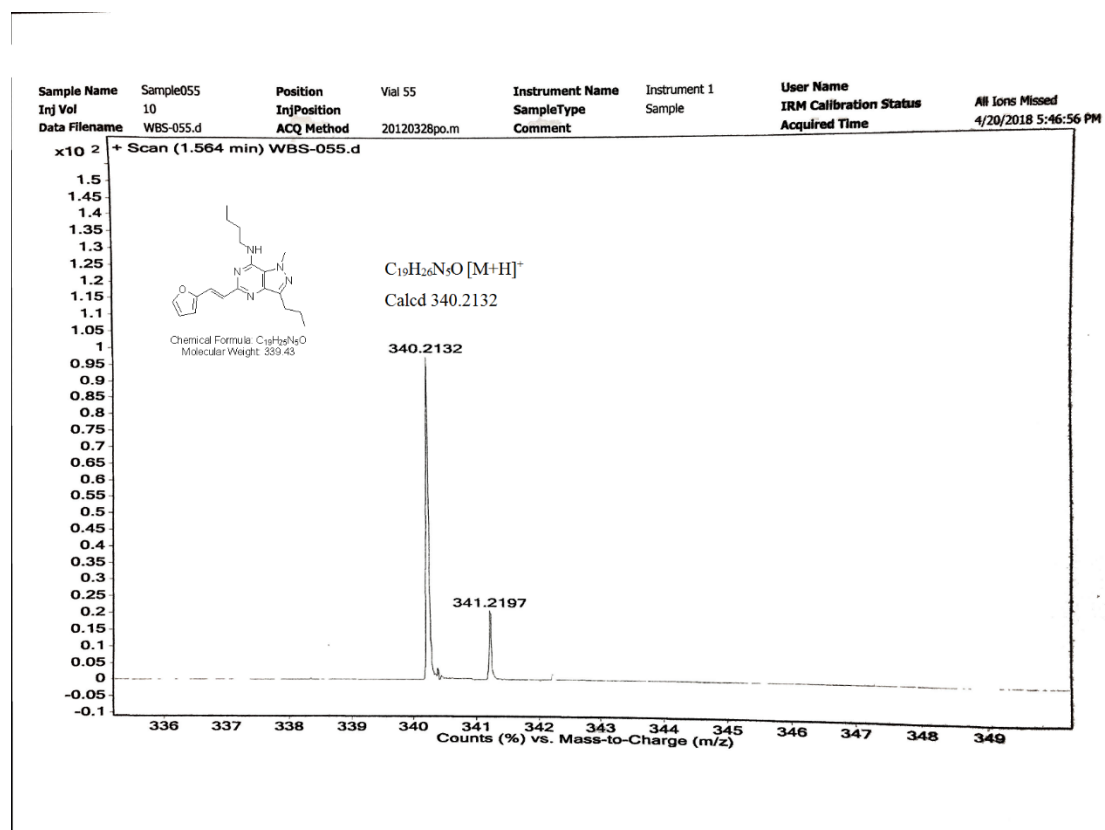

## HR-MS data for 3c

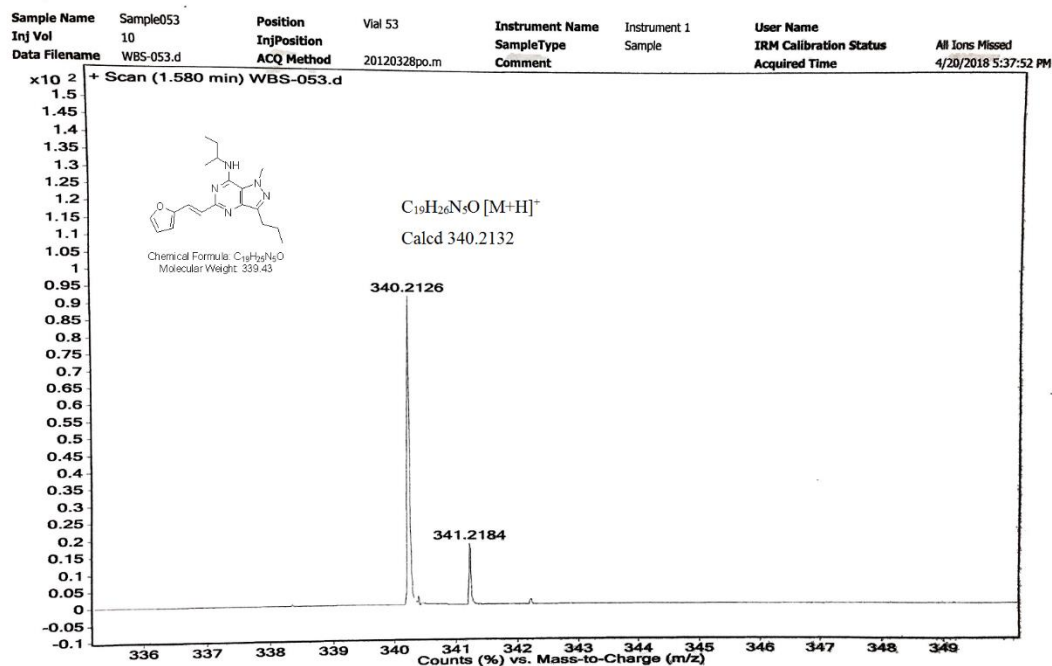

### HR-MS data for 3d

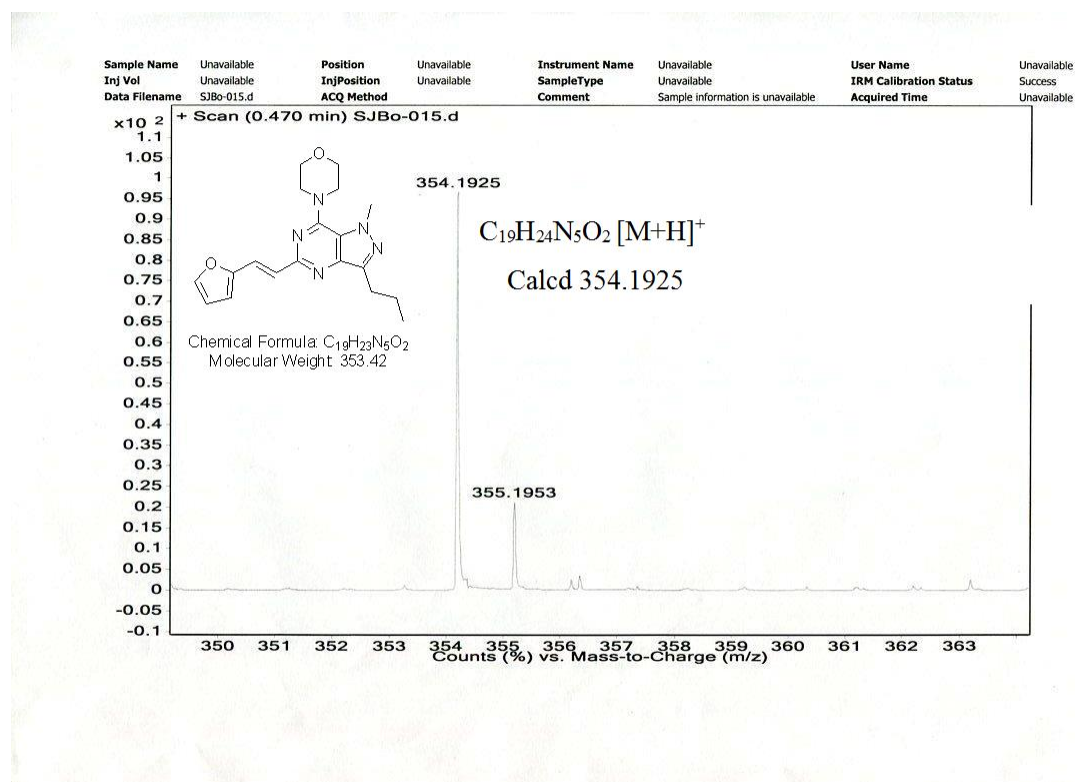

### HR-MS data for 3e

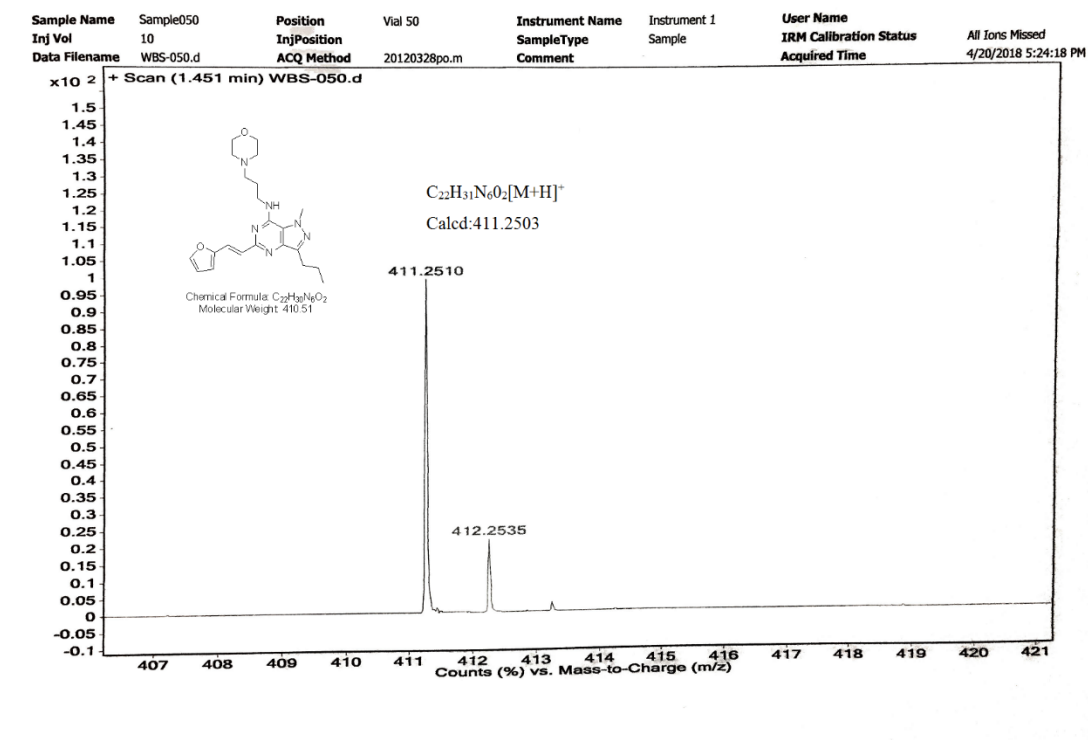

## HR-MS data for 3f

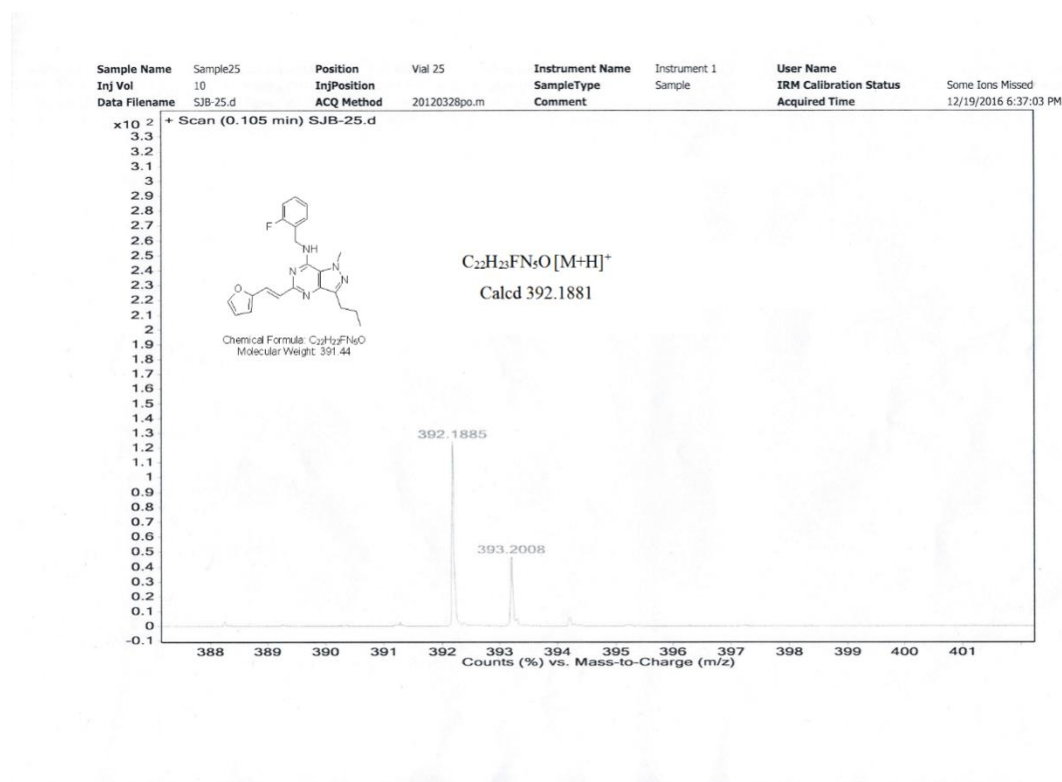

## HR-MS data for 3g

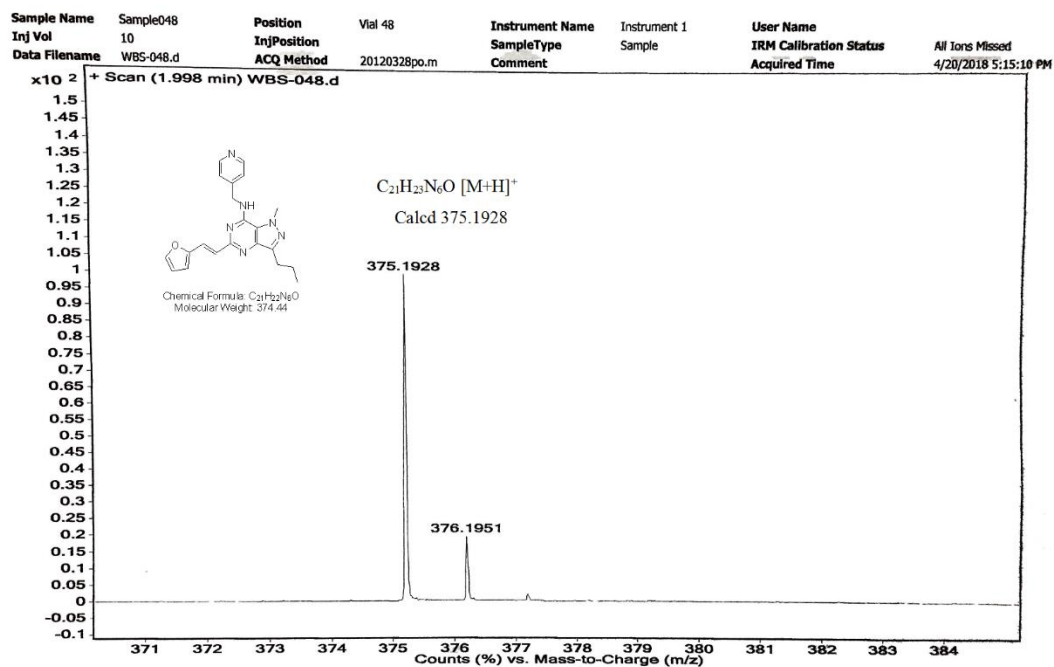

## HR-MS data for 4a

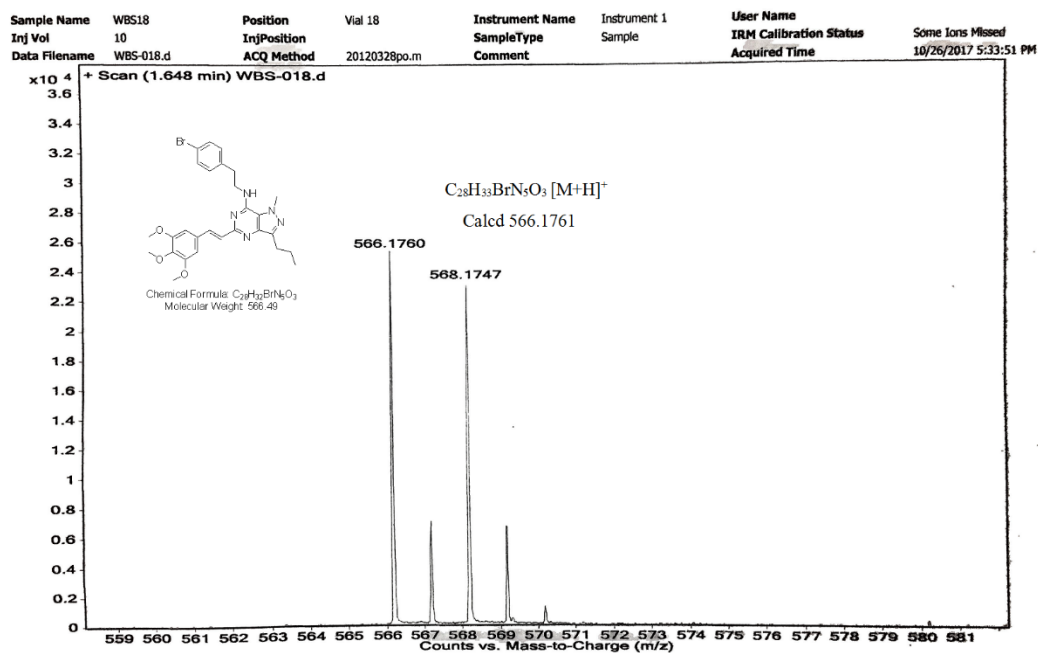

## HR-MS data for 4b

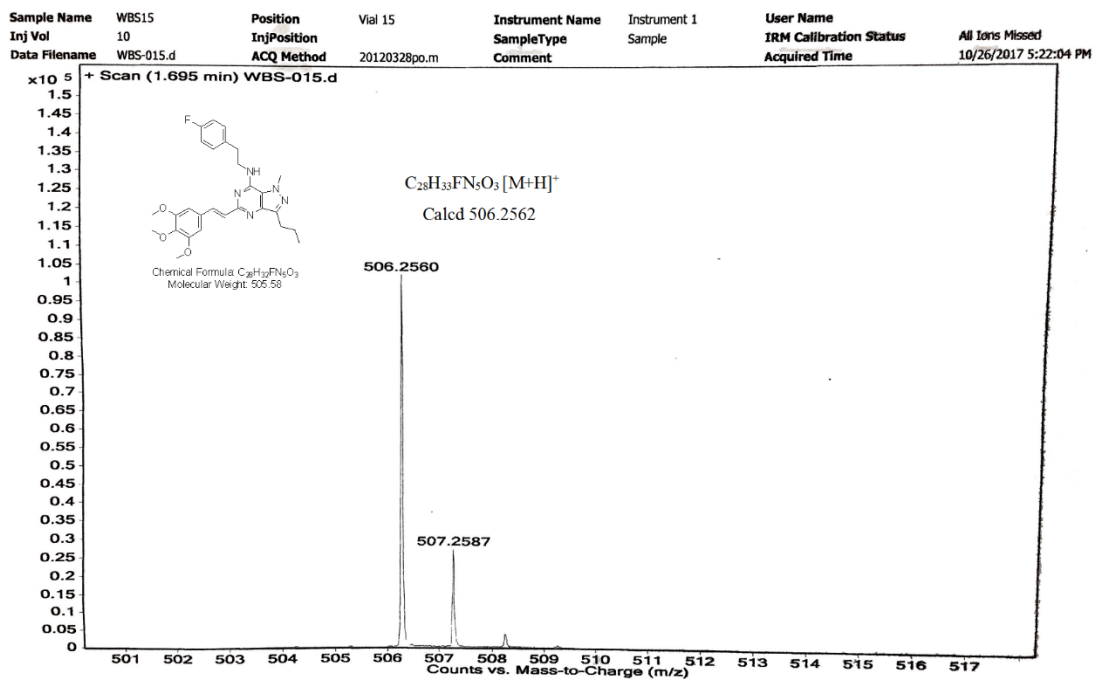

## HR-MS data for 4c

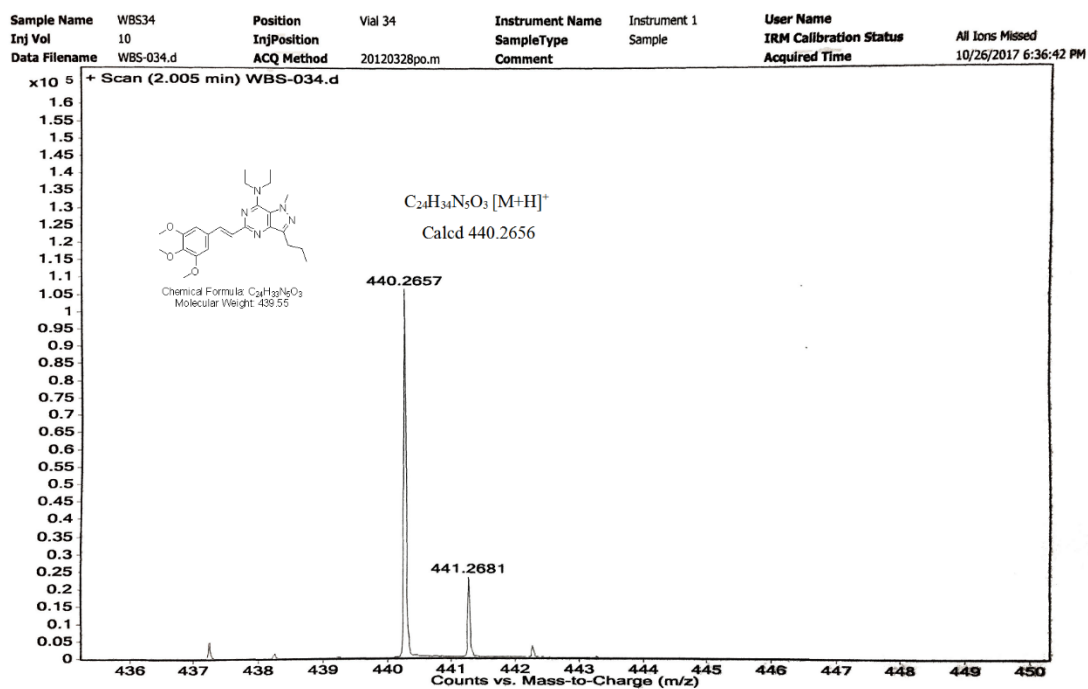

## HR-MS data for 4d

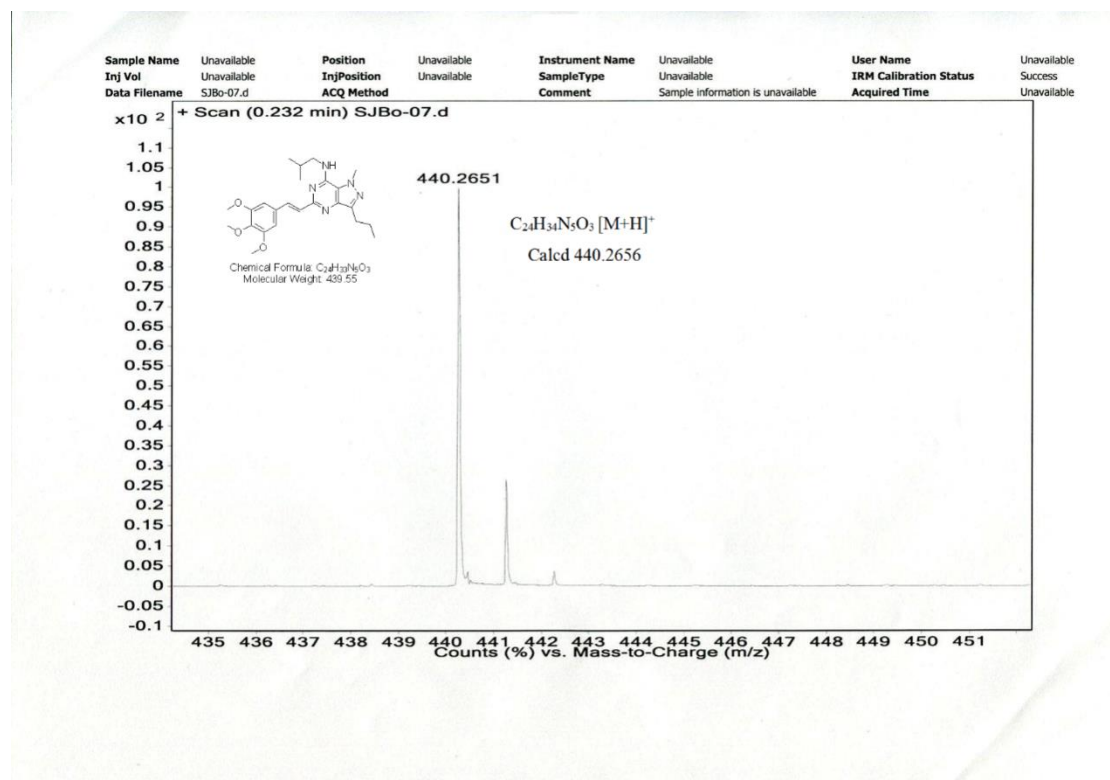

## HR-MS data for 4e

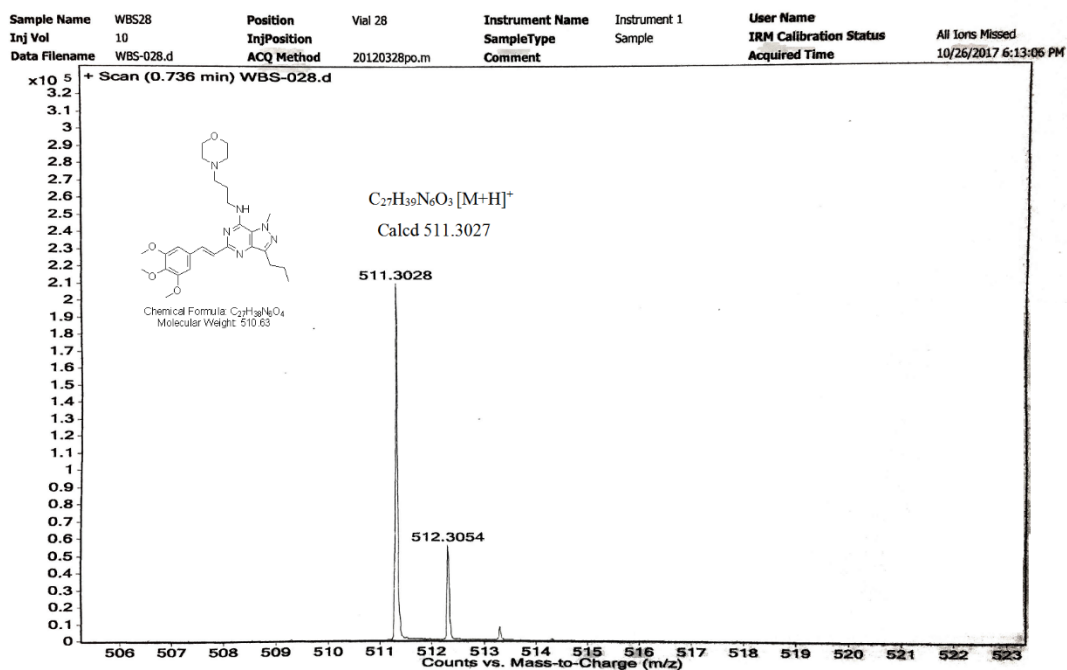

## HR-MS data for 4f

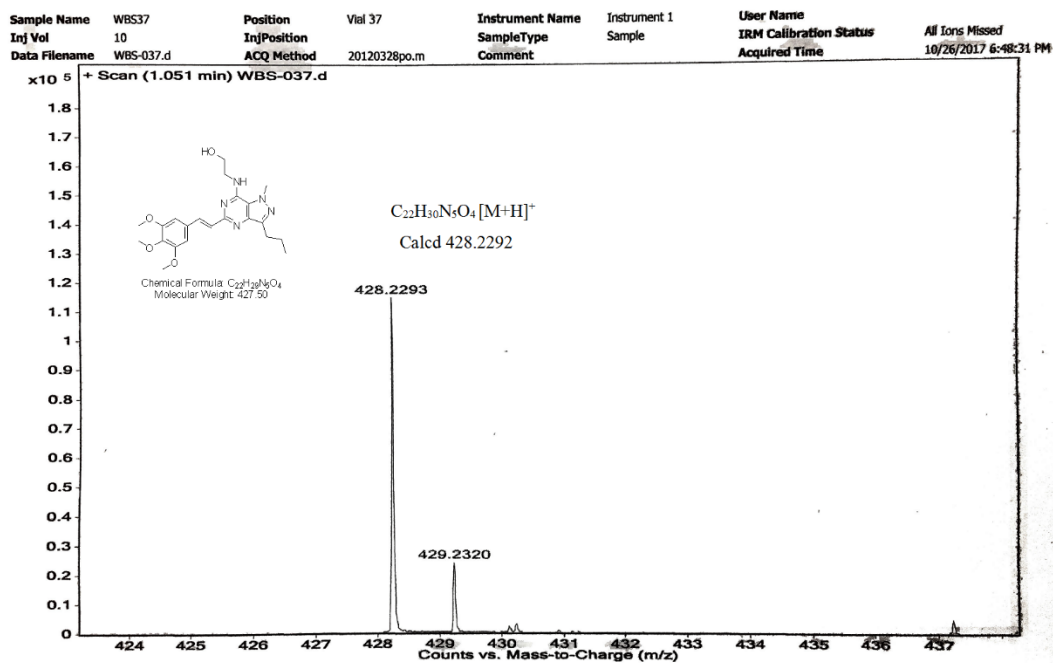



## HR-MS data for 4g

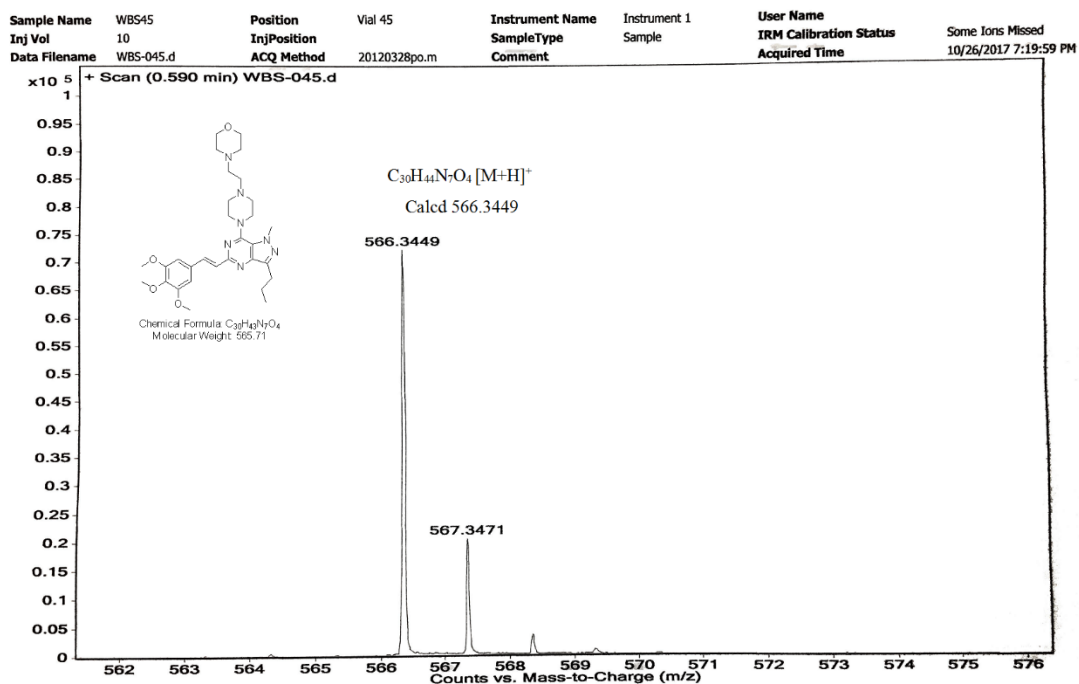

## HR-MS data for 4h

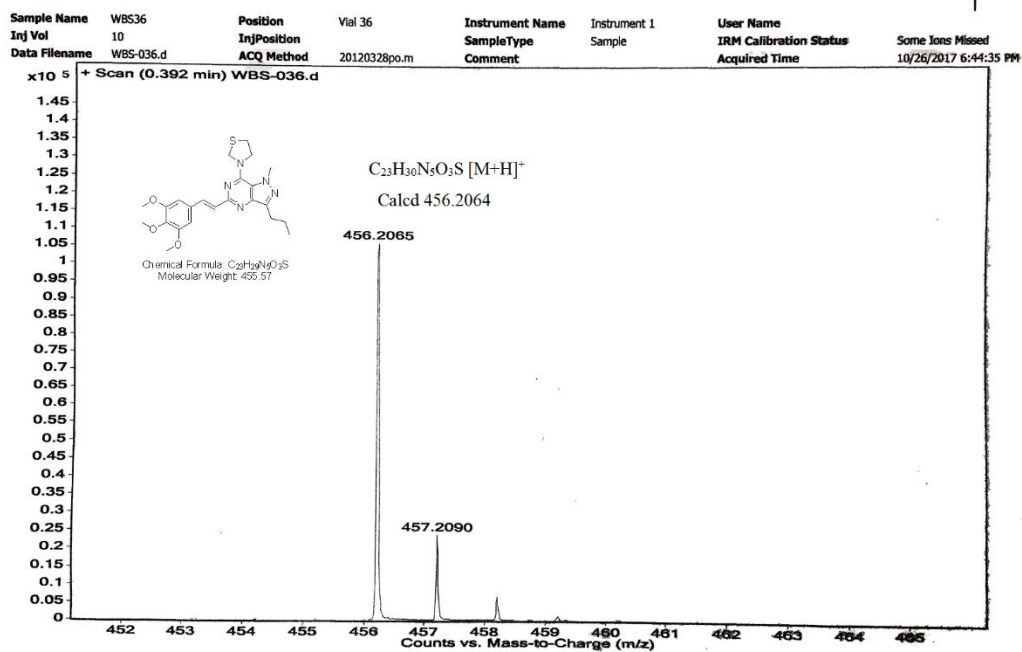

## HR-MS data for 4i

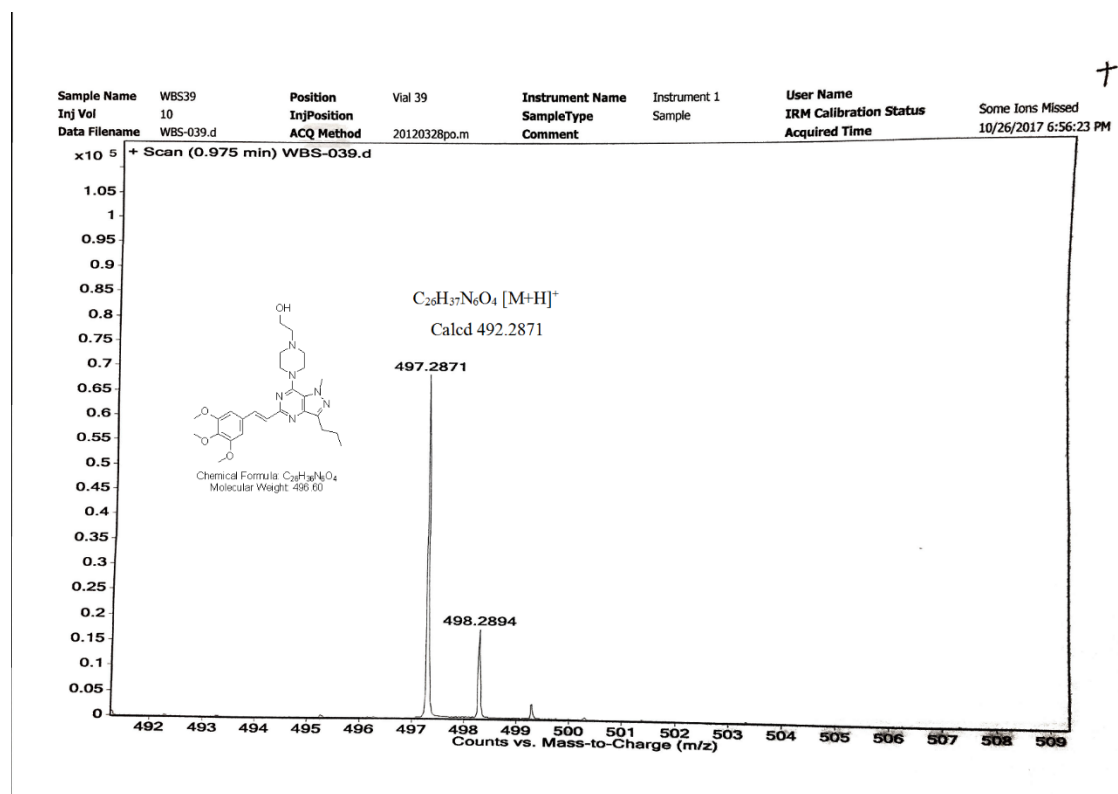

## HR-MS data for 4j

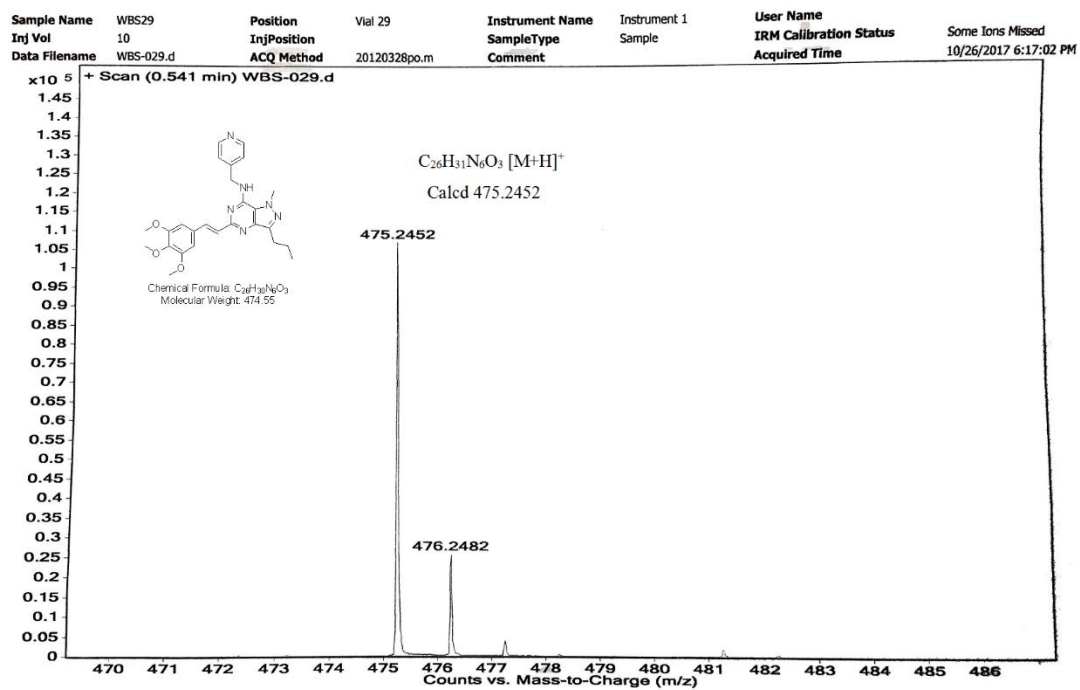

# HR-MS data for 4k

|               |          |             |              |                 |              |                        |                       |
|---------------|----------|-------------|--------------|-----------------|--------------|------------------------|-----------------------|
| Sample Name   | WBS8     | Position    | Vial 8       | Instrument Name | Instrument 1 | User Name              |                       |
| Inj Vol       | 10       | InjPosition |              | SampleType      | Sample       | IRM Calibration Status | Success               |
| Data Filename | WBS-08.d | ACQ Method  | 20120328po.m | Comment         |              | Acquired Time          | 10/26/2017 4:54:35 PM |

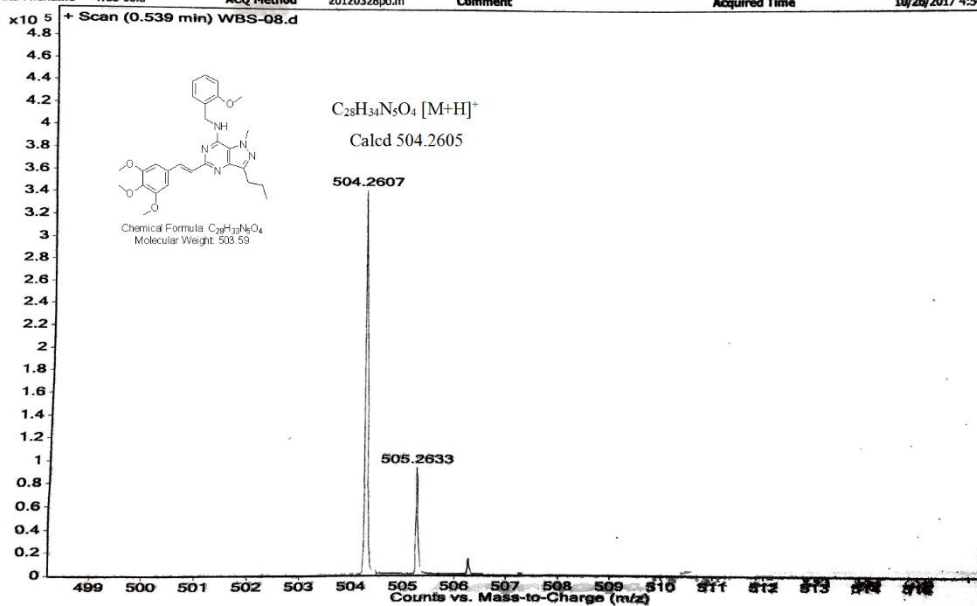

Supplement: IENZ_A_1618291_SM1400.pdf [file IENZ_A_1618291_SM1400.pdf]
